# Supplementary material for: Rh-Catalyzed oxidation and trifluoroethoxylation of N-aryl-pyrrolidin-2-ones: a domino approach for the synthesis of N-aryl-5-(2,2,2-trifluoroethoxy)-1,5-dihydro-2H-pyrrol-2-ones
Source: Royal Society of Chemistry journal article supplement (doi:10.1039/d1qo01319j), 2022-01-01
Supplement: d1qo01319j1.pdf [file d1qo01319j1.pdf]

# **Rh-Catalyzed Oxidation and Trifluoroethoxylation of *N*-Aryl-pyrrolidin-2-ones : A Domino Approach for the Synthesis of *N*-Aryl-5-(2,2,2-trifluoroethoxy)-1,5-dihydro-2*H*-pyrrol-2-ones**

Yang Luo, Mingli Hu, Jun Ge, Bin Li and Ling He \*

*Key Laboratory of Drug-Targeting and Drug Delivery System of the Education Ministry, Sichuan Engineering Laboratory for Plant-Sourced Drug and Sichuan Research Center for Drug Precision Industrial Technology, Department of Medicinal Chemistry, West China School of Pharmacy, Sichuan University, Chengdu, Sichuan, 610041, P. R. China.*

## **Tables of contents**

|                                                                                                                                       |           |
|---------------------------------------------------------------------------------------------------------------------------------------|-----------|
| <b>1. General Information .....</b>                                                                                                   | <b>1</b>  |
| <b>2. Typical Procedure for the Synthesis of Substrates.....</b>                                                                      | <b>1</b>  |
| <b>3. Typical Procedure for the Preparation of 1-substituted- 5-(2,2,2-trifluoroethoxy)-1,5-dihydro-2<i>H</i>-pyrrol-2-ones .....</b> | <b>2</b>  |
| <b>4. Optimization of reaction conditions.....</b>                                                                                    | <b>2</b>  |
| <b>5. Mechanistic Experiments .....</b>                                                                                               | <b>3</b>  |
| <b>6. Further applications .....</b>                                                                                                  | <b>5</b>  |
| 6.1 Further reactions .....                                                                                                           | 5         |
| <b>7. Mass spectrometry.....</b>                                                                                                      | <b>6</b>  |
| <b>8. Analytic Date.....</b>                                                                                                          | <b>7</b>  |
| <b>9. NMR Spectra .....</b>                                                                                                           | <b>15</b> |
| <b>10. References.....</b>                                                                                                            | <b>50</b> |

## 1. General Information

The Silica gel F254 plates were used for thin layer chromatography (TLC) in which the spots were examined under UV light at 254 nm. Flash chromatography was performed on silica gel (300-400 mesh). Anhydrous solvents were obtained according to standard procedures. Tetrahydrofuran (THF) was distilled from sodium-benzophenoneketyl. Methylene chloride ( $\text{CH}_2\text{Cl}_2$ ) was distilled over  $\text{P}_2\text{O}_5$ . Methanol (MeOH) was distilled from magnesium. All other commercial reagents were purchased from commercial sources and used as received. NMR spectra were recorded on Varian Mercury spectrometer (400 MHz and 600 MHz).  $^1\text{H}$  NMR spectra were recorded at ambient temperature at 400 MHz or 600 MHz.  $^{13}\text{C}$  NMR spectra were recorded at ambient temperature at 100 MHz or 150 MHz. For  $^1\text{H}$  NMR spectra acquired in  $\text{CDCl}_3$ , chemical shifts are reported as  $\delta$  values in ppm and are calibrated according to internal  $\text{CHCl}_3$  (7.26 ppm). For  $^{13}\text{C}$  NMR spectra, chemical shifts are reported as  $\delta$  values in ppm relative to  $\text{CHCl}_3$ . The NMR data are reported as follows: chemical shift in ppm on the  $\delta$  scale, multiplicity (app = apparent, br = broad, s = singlet, d = doublet, t = triplet, q = quartet, quin = quintet, m = multiplet), coupling constants (Hz), and integration. LCMS/ HRMS were recorded on a Bruker Daltonics Data analysis 3.4 mass spectrometer.

## 2. Typical Procedure for the Synthesis of Substrates

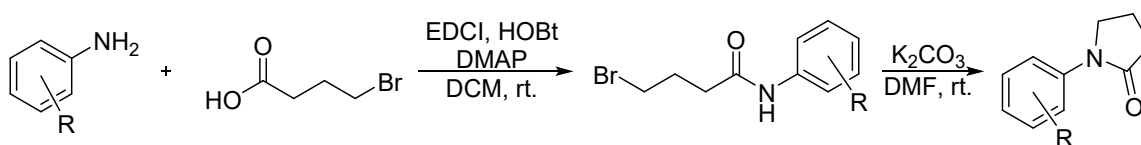

A flame-dried round-bottomed flask was charged with dry  $\text{DCM}$  (10 mL, 0.1 M), Aniline (1 mmol, 1 eq), 4-Bromobutyric acid (1.2 mmol, 1.2 eq), EDCI (1-(3-dimethylaminopropyl)-3-ethylcarbodiimide hydrochloride, 1.2 mmol, 1.2 eq.), HOBT (1-hydroxybenzotriazole, 1.2 mmol, 1.2 eq) and DMAP (0.2 mmol, 20 mol%). The reaction mixture was stirring for 30 minutes at room temperature, and then the substituted aniline (1 mmol, 1 eq.) was added. After consumption of the starting material (monitored by TLC) the reaction mixture was concentrated under reduced pressure. Then diluted with ethyl acetate (40 mL) and the mixture was washed with 1 M  $\text{HCl}$  (20 mL) three times. The organic layer was washed with brine and dried with anhydrous  $\text{Na}_2\text{SO}_4$ . The crude product was concentrated for next step without further purified. A solution of the above crude product in dry  $\text{DMF}$  (5 mL) was added  $\text{K}_2\text{CO}_3$  (2.0 mmol) and the mixture was stirred overnight. After completion of the reaction monitored with TLC, the reaction mixture was diluted with ethyl acetate (40 mL) and washed with saturated  $\text{NaCl}$  solution ( $3 \times 20$  mL). The combined organic layers were dried over  $\text{MgSO}_4$  and filtered. The solvent was removed in vacuo. The resulting product was purified by flash silica gel column chromatography using  $\text{PE} / \text{EA}$  (2:1) as eluent.

### 3. Typical Procedure for the Preparation of 1-substituted- 5-(2,2,2-trifluoroethoxy)-1,5-dihydro-2H-pyrrol-2-ones

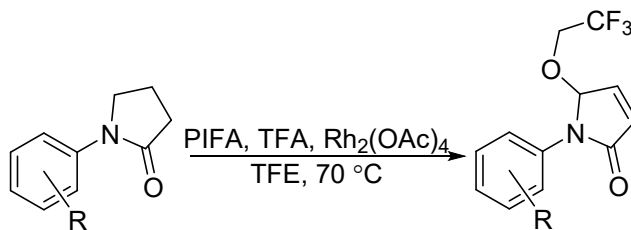

To a solution of 1-substituted pyrrolidin-2-one (0.3 mmol) in TFE (3 mL) was added PIFA (1.05 mmol),  $\text{Rh}_2(\text{OAc})_4$  (2 mol%), TFA (0.3 mmol) at room temperature and the solution was stirred for 5 min. Then heat the mixture to 70 degrees. After consumption of the starting material (monitored by TLC) the reaction mixture was concentrated under reduced pressure. The resulting product was purified by flash silica gel column chromatography using PE / EA (2:1) as eluent.

### 4. Optimization of reaction conditions

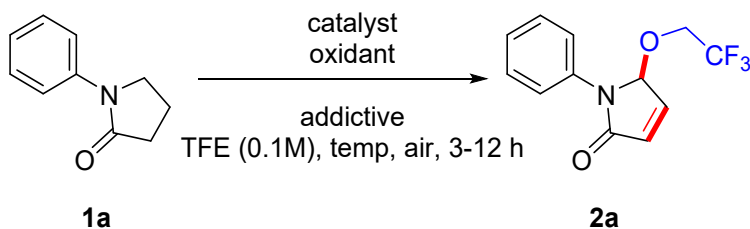

Table S1. Screening of catalyst<sup>a</sup>

| Entry           | Catalyst                                             | Amount (mol%) | Yield (%) | Time (h) |
|-----------------|------------------------------------------------------|---------------|-----------|----------|
| 1               | $\text{Cu}(\text{OAc})_2$                            | 20            | 0         | 12       |
| 2               | $\text{Pd}(\text{OAc})_2$                            | 20            | 0         | 12       |
| 3               | $\text{RhCl}_3$                                      | 10            | 0         | 3        |
| 4               | $\text{Rh}_2(\text{OAc})_4$                          | 10            | 59        | 3        |
| 5               | $\text{RhCl}_3$                                      | 10            | 0         | 3        |
| 6               | $\text{Rh}_2(\text{OAc})_4$                          | 5             | 59        | 3        |
| 7               | $\text{Rh}_2(\text{OAc})_4$                          | 2             | 57        | 3        |
| 8               | $\text{Rh}_2(\text{OAc})_4$                          | 1             | 29        | 9        |
| 9               | $\text{Rh}_2(\text{OAc})_4$                          | 0             | 0         | 12       |
| 10 <sup>b</sup> | $\text{Rh}_2(\text{OAc})_4$                          | 2             | 57        | 3        |
| 11 <sup>c</sup> | $\text{Rh}_2(\text{TFA})_4$                          | 5             | 0         | 3        |
| 12              | $\text{Rh}_2(\text{TFA})_4$                          | 5             | 62        | 3        |
| 13              | $[\text{Rh}(\text{C}_8\text{H}_{15}\text{O}_2)_2]_2$ | 5             | 48        | 3        |

a. Reaction condition: substrate 1a (0.1 mmol), PIFA (0.35 mmol),  $\text{Rh}_2(\text{OAc})_4$  (x mol%), TFA (0.1

mmol), TFE (0.1M).

b. Reaction condition: air instead of N<sub>2</sub>.

c. Reaction condition: substrate 1a (0.1 mmol), PIFA (0.35 mmol), TFE (0.1M).

**Table S2. Screening of oxidant<sup>a</sup>**

| Entry | Oxidant                                       | Amount(eq) | Yield(%) | Time |
|-------|-----------------------------------------------|------------|----------|------|
| 1     | PIFA                                          | 3          | 53       | 6    |
| 2     | PIDA                                          | 3.5        | trace    | 12   |
| 3     | K <sub>2</sub> S <sub>2</sub> O <sub>8</sub>  | 3.5        | 5        | 12   |
| 4     | Na <sub>2</sub> S <sub>2</sub> O <sub>8</sub> | 3.5        | 0        | 12   |
| 5     | OXONE                                         | 3.5        | 0        | 12   |
| 6     | selectfluor                                   | 3.5        | 46       | 12   |
| 7     | PIFA                                          | 3.5        | 59       | 3    |
| 8     | PIFA                                          | 4          | 57       | 3    |
| 9     | PIFA                                          | 2          | 28       | 12   |
| 10    | PIFA                                          | 0          | 0        | 12   |

a. Reaction condition: substrate 1a (0.1 mmol), oxidant (x mmol), Rh<sub>2</sub>(OAc)<sub>4</sub> (2 mol%), TFA (0.1 mmol), TFE (0.1M).

**Table S3. Screening of additive<sup>a</sup>**

| Entry | Additive | Amount (eq) | Yield (%) | Time (h) |
|-------|----------|-------------|-----------|----------|
| 1     | TFA      | 10          | 59        | 3        |
| 2     | TFA      | 5           | 56        | 3        |
| 3     | TFA      | 1           | 57        | 3        |
| 4     | TFA      | 0           | trace     | 12       |

a. Reaction condition: substrate 1a (0.1 mmol), PIFA (0.35 mmol), Rh<sub>2</sub>(OAc)<sub>4</sub> (2 mol%), TFA (x mmol), TFE (0.1M).

## 5. Mechanistic Experiments

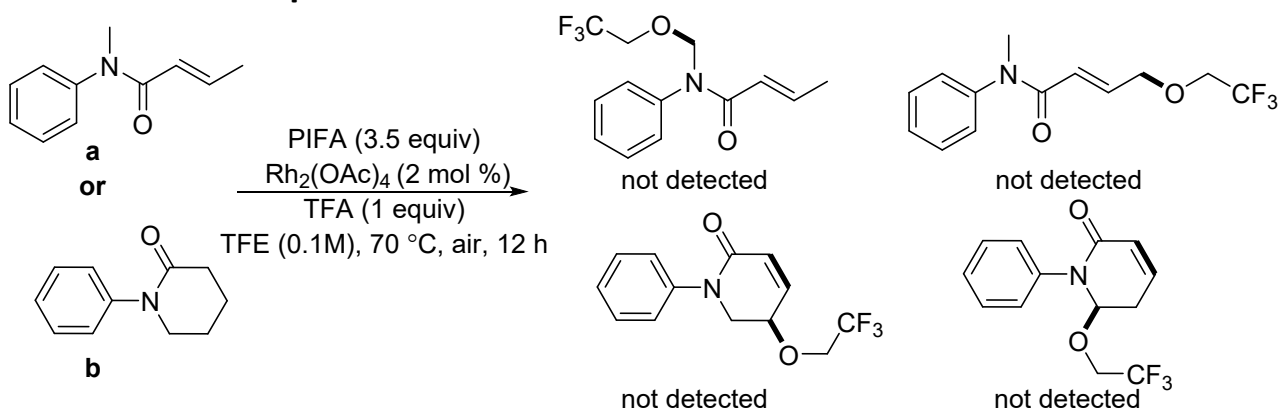

To a solution of **a** or **b** (0.3 mmol) in TFE (3 mL) was added PIFA (1.05 mmol),  $\text{Rh}_2(\text{OAc})_4$  (5 mol%), TFA (0.3 mmol) at room temperature and the solution was stirred for 5 min at that temperature before transfer to 70 °C. Sampling after 12 h for LC-MS detection and analysis. The expected compound was not detected.

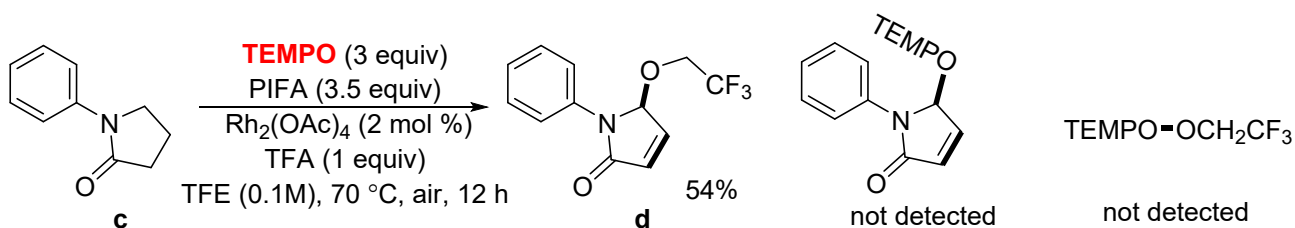

According to the typical procedure for the preparation of 1-substituted- 5-(2,2,2-trifluoroethoxy)-1,5-dihydro-2*H*-pyrrol-2-ones and added TEMPO (3 eq.). Sampling after 12 h for LC-MS detection and analysis. LC-MS results showed that no substrate or TFE captured by TEMPO was detected.

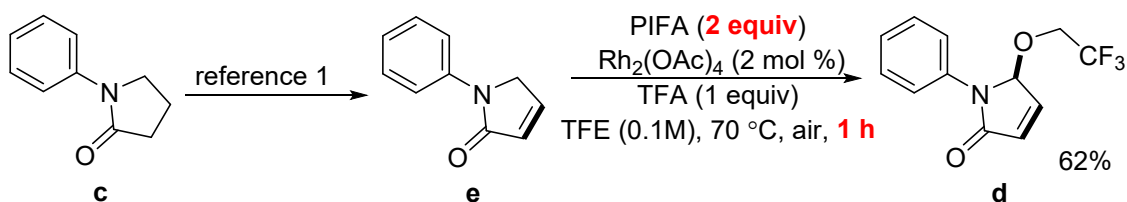

According to the reference 1 transfer **c** to **e**<sup>1</sup>. To a solution of **e** (0.3 mmol) in TFE (3 mL) was added PIFA (0.6 mmol),  $\text{Rh}_2(\text{OAc})_4$  (5 mol%), TFA (0.3 mmol) at room temperature and the solution was stirred for 5 min at that temperature before transfer to 70 °C. After consumption of the starting material (monitored by TLC) the reaction mixture was concentrated under reduced pressure. The resulting product was purified by flash silica gel column chromatography using PE / EA (2:1) as eluent.

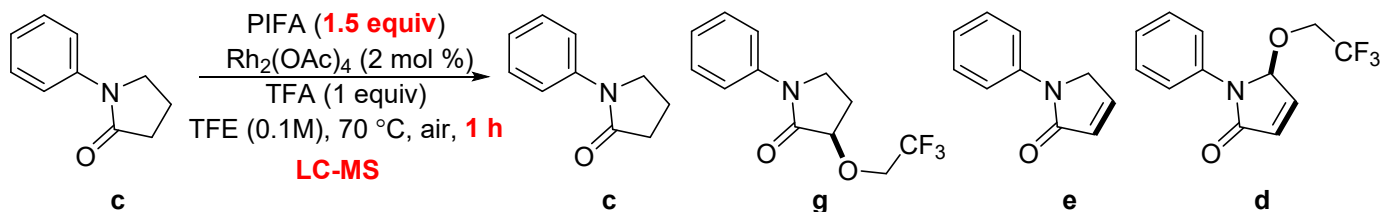

To a solution of **c** (0.3 mmol) in TFE (3 mL) was added PIFA (0.45 mmol),  $\text{Rh}_2(\text{OAc})_4$  (5 mol%), TFA (0.3 mmol) at room temperature and the solution was stirred for 5 min at that temperature before transfer to 70 °C. Sampling after 1 h for LC-MS detection and analysis. The expected compound **c**, **g**, **e** and **d** was detected.

## 6. Further applications

### 6.1 Further reactions

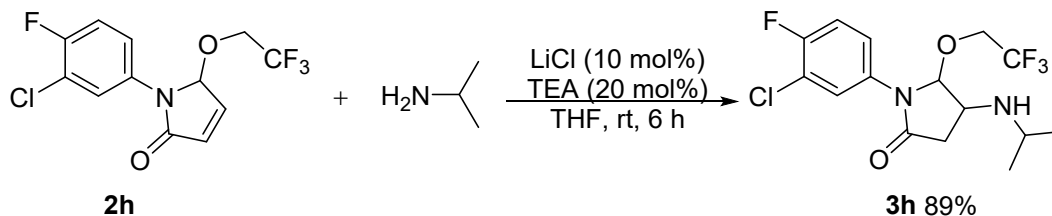

To a solution of **3h** (0.2 mmol) in THF (2 mL) was added isopropamide (0.4 mmol), LiCl (10 mol%), TEA (20 mol%) at room temperature and the solution was stirred for 6 h. Upon completion of reaction (monitored by TLC), the mixture was concentrated under reduced pressure and purified by flash column chromatography on silica gel using PE / EA (2:1) as eluent to afford the desired product.

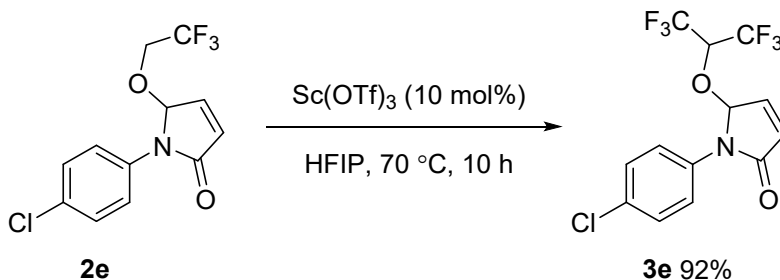

To a solution of **5h** (0.2 mmol) in HFIP (2 mL) was added  $\text{Sc}(\text{OTf})_3$  (10 mol%) and stirred for 10 h at 70 °C. Upon completion of reaction (monitored by TLC), the mixture was concentrated under reduced pressure and purified by flash column chromatography on silica gel using PE / EA (2:1) as eluent to afford the desired product.

## 7. Mass spectrometry

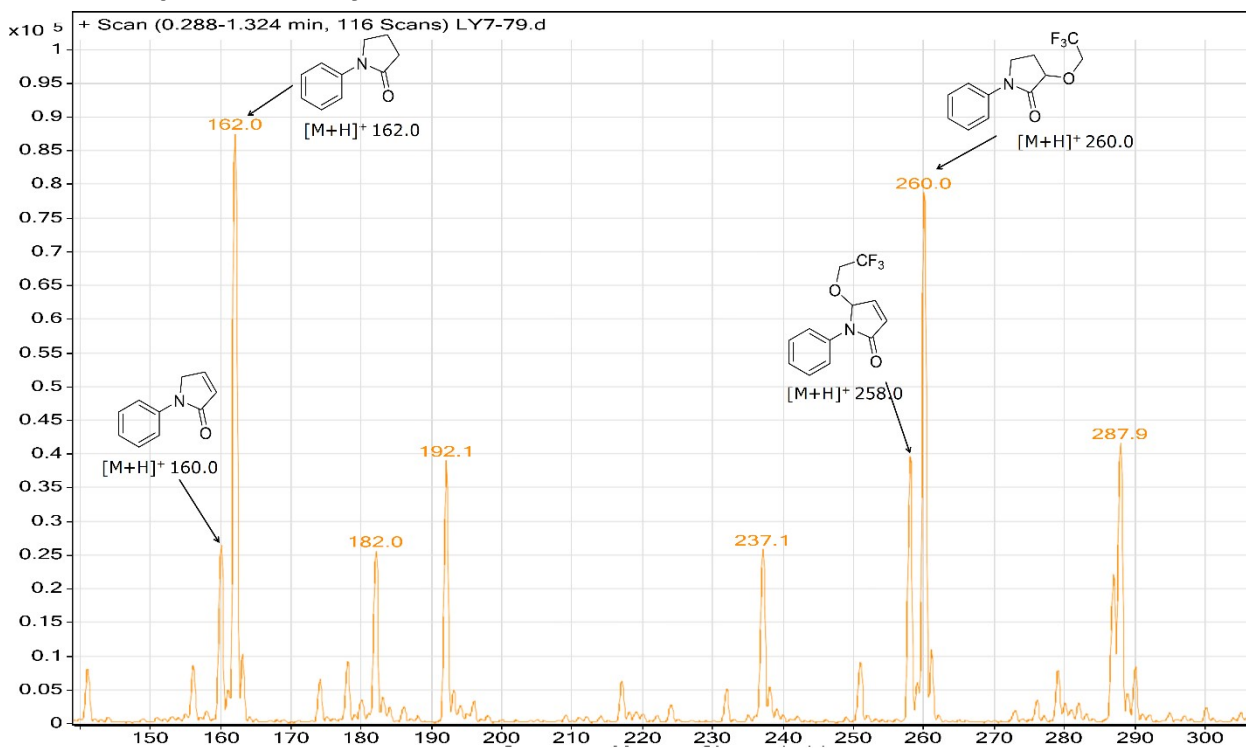

## 8. Analytic Date

### phenylpyrrolidin-2-one (1a) <sup>2</sup>

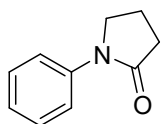

White solid, yield 80%. <sup>1</sup>H NMR (400 MHz, Chloroform-*d*) δ 7.61 (d, *J* = 7.7 Hz, 2H), 7.37 (t, *J* = 7.7 Hz, 2H), 7.14 (t, *J* = 7.4 Hz, 1H), 3.87 (t, *J* = 7.0 Hz, 2H), 2.62 (t, *J* = 8.1 Hz, 2H), 2.16 (p, *J* = 7.7 Hz, 2H).

### (4-fluorophenyl)pyrrolidin-2-one (1b) <sup>2</sup>

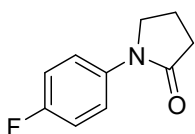

White solid, yield 73%. <sup>1</sup>H NMR (400 MHz, Chloroform-*d*) δ 7.59-7.54 (m, 2H), 7.06 (t, *J* = 8.7 Hz, 2H), 3.84 (t, *J* = 7.0 Hz, 2H), 2.61 (t, *J* = 8.1 Hz, 2H), 2.17 (p, *J* = 7.5 Hz, 2H).

### (3-fluorophenyl)pyrrolidin-2-one (1c) <sup>2</sup>

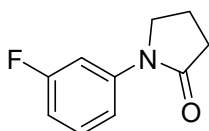

White solid, yield 67%. <sup>1</sup>H NMR (400 MHz, Chloroform-*d*) δ 7.52 (d, *J* = 11.5 Hz, 1H), 7.39 – 7.27 (m, 2H), 6.84 (t, *J* = 7.9 Hz, 1H), 3.85 (t, *J* = 7.0 Hz, 2H), 2.63 (t, *J* = 8.1 Hz, 2H), 2.18 (p, *J* = 7.5 Hz, 2H).

### (2-fluorophenyl)pyrrolidin-2-one (1d) <sup>2</sup>

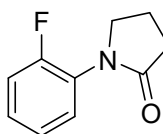

White solid, yield 63%. <sup>1</sup>H NMR (400 MHz, Chloroform-*d*) δ 7.46 – 7.37 (m, 1H), 7.26 – 7.21 (m, 1H), 7.20 – 7.09 (m, 2H), 3.83 (t, *J* = 7.0 Hz, 2H), 2.58 (t, *J* = 8.1 Hz, 2H), 2.21 (p, *J* = 7.5 Hz, 2H).

### (4-chlorophenyl)pyrrolidin-2-one (1e) <sup>2</sup>

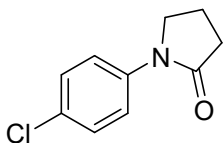

White solid, yield 72%. <sup>1</sup>H NMR (400 MHz, Chloroform-*d*) δ 7.58 (d, *J* = 9.0 Hz, 2H), 7.32 (d, *J* = 9.0 Hz, 2H), 3.84 (t, *J* = 7.0 Hz, 2H), 2.62 (t, *J* = 8.1 Hz, 2H), 2.17 (p, *J* = 7.5 Hz, 2H).

### 1-(3-chlorophenyl)pyrrolidin-2-one (1f) <sup>2</sup>

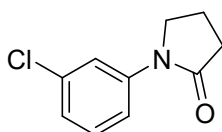

White solid, yield 65%. <sup>1</sup>H NMR (400 MHz, Chloroform-*d*) δ 7.67 (t, *J* = 2.0 Hz, 1H), 7.60 – 7.48 (m, 1H), 7.28 (s, 1H), 7.19 – 7.03 (m, 1H), 3.84 (t, *J* = 7.0 Hz, 2H), 2.62 (t, *J* = 8.1 Hz, 2H), 2.17 (p, *J* = 7.6 Hz, 2H).

### (4-bromophenyl)pyrrolidin-2-one (1g) <sup>3</sup>

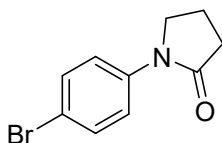

White solid, yield 20%. <sup>1</sup>H NMR (400 MHz, Chloroform-*d*) δ 7.53 (d, *J* = 8.8 Hz, 2H), 7.47 (d, *J* = 8.8 Hz, 2H), 3.84 (t, *J* = 7.0 Hz, 2H), 2.61 (t, *J* = 8.0 Hz, 2H), 2.17 (p, *J* = 7.4 Hz, 2H).

### 1-(3-chloro-4-fluorophenyl)pyrrolidin-2-one (1h)

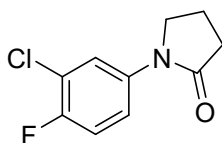

White solid, yield 64%. <sup>1</sup>H NMR (400 MHz, Chloroform-*d*) δ 7.73 (dd, *J* = 6.5, 2.6 Hz, 1H), 7.52-7.48 (m, 1H), 7.12 (t, *J* = 8.8 Hz, 1H), 3.82 (t, *J* = 7.0 Hz, 2H), 2.61 (t, *J* = 8.1 Hz, 2H), 2.18 (p, *J* = 7.6 Hz, 2H). <sup>13</sup>C NMR (101 MHz, Chloroform-*d*) δ 174.2, 154.8 (d, *J* = 246.6 Hz), 136.1 (d, *J* = 3.3 Hz), 121.9,



120.9 (d,  $J = 18.5$  Hz), 119.4 (d,  $J = 6.9$  Hz), 116.4 (d,  $J = 21.9$  Hz), 48.8, 32.5, 17.8. HRMS(ESI)  $m/z$ : calculated for  $C_{10}H_{10}ClFNO$   $[M+H]^+$  214.0430, found 214.0429.

### 1-(4-chloro-2-fluorophenyl)pyrrolidin-2-one (**1i**)

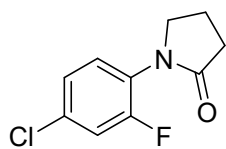

White solid, yield 58%.  $^1H$  NMR (400 MHz, Chloroform- $d$ )  $\delta$  7.42 – 7.33 (m, 1H), 7.21 – 7.12 (m, 2H), 3.81 (t,  $J = 6.6$  Hz, 2H), 2.56 (t,  $J = 8.1$  Hz, 2H), 2.21 (p,  $J = 7.5$  Hz, 2H).  $^{13}C$  NMR (101 MHz, Chloroform- $d$ )  $\delta$  174.8, 156.8 (d,  $J = 253.7$  Hz), 132.9 (d,  $J = 9.9$  Hz), 128.5 (d,  $J = 2.9$  Hz), 125.2 (d,  $J = 11.8$  Hz), 124.9 (d,  $J = 3.6$  Hz), 117.4 (d,  $J = 23.6$  Hz), 49.8, 30.9, 19.0. HRMS(ESI)  $m/z$ : calculated for  $C_{10}H_{10}ClFNO$   $[M+H]^+$  214.0430, found 214.0430.

### 1-(3,5-difluorophenyl)pyrrolidin-2-one (**1j**)

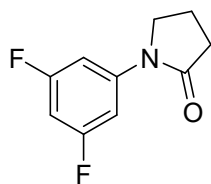

White solid, yield 61%.  $^1H$  NMR (400 MHz, Chloroform- $d$ )  $\delta$  7.27 (d,  $J = 7.8$  Hz, 2H), 6.58 (t,  $J = 8.8$  Hz, 1H), 3.82 (t,  $J = 7.0$  Hz, 2H), 2.63 (t,  $J = 8.1$  Hz, 2H), 2.18 (p,  $J = 7.6$  Hz, 2H).  $^{13}C$  NMR (101 MHz, Chloroform- $d$ )  $\delta$  174.5, 164.3 (d,  $J = 14.8$  Hz), 161.9 (d,  $J = 14.7$  Hz), 141.5 (t,  $J = 13.1$  Hz), 102.4 (dd,  $J = 60.6, 9.0$  Hz), 99.4 (t,  $J = 25.7$  Hz), 48.5, 32.9, 17.7. HRMS(ESI)  $m/z$ : calculated for  $C_{10}H_{10}F_2NO$   $[M+H]^+$  198.0725, found 198.0729.

### 1-(3,5-dichlorophenyl)pyrrolidin-2-one (**1k**)<sup>4</sup>

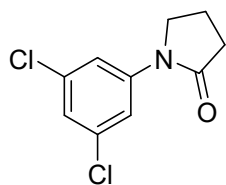

White solid, yield 63%.  $^1H$  NMR (400 MHz, Chloroform- $d$ )  $\delta$  7.61 (s, 2H), 7.13 (s, 1H), 3.82 (t,  $J = 7.0$  Hz, 2H), 2.63 (t,  $J = 8.1$  Hz, 2H), 2.18 (p,  $J = 7.5$  Hz, 2H).

### 1-(4-(trifluoromethyl)phenyl)pyrrolidin-2-one (**1l**)<sup>2</sup>

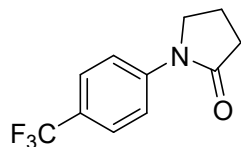

White solid, yield 20%.  $^1H$  NMR (400 MHz, Chloroform- $d$ )  $\delta$  7.77 (d,  $J = 8.6$  Hz, 2H), 7.62 (d,  $J = 8.6$  Hz, 2H), 3.90 (t,  $J = 7.0$  Hz, 2H), 2.65 (t,  $J = 8.1$  Hz, 2H), 2.20 (p,  $J = 7.6$  Hz, 2H).

### 1-(3-(trifluoromethyl)phenyl)pyrrolidin-2-one (**1m**)<sup>2</sup>

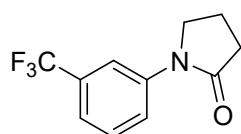

White solid, yield 59%.  $^1H$  NMR (400 MHz, Chloroform- $d$ )  $\delta$  7.92 (d,  $J = 8.1$  Hz, 1H), 7.84 (s, 1H), 7.49 (t,  $J = 8.0$  Hz, 1H), 7.40 (d,  $J = 8.0$  Hz, 1H), 3.90 (t,  $J = 7.0$  Hz, 2H), 2.65 (t,  $J = 8.1$  Hz, 2H), 2.20 (p,  $J = 7.4$  Hz, 2H).

### 1-(4-(tert-butyl)phenyl)pyrrolidin-2-one (**1n**)<sup>2</sup>

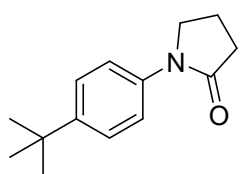

White solid, yield 79%.  $^1H$  NMR (400 MHz, Chloroform- $d$ )  $\delta$  7.51 (d,  $J = 8.7$  Hz, 2H), 7.38 (d,  $J = 8.7$  Hz, 2H), 3.85 (t,  $J = 7.0$  Hz, 2H), 2.60 (t,  $J = 8.1$  Hz, 2H), 2.15 (p,  $J = 7.5$  Hz, 2H), 1.31 (s, 9H).  $^{13}C$  NMR (101 MHz, Chloroform- $d$ )  $\delta$  174.1, 147.5, 136.8, 125.7, 119.8, 48.9, 34.4, 32.7, 31.4.

### 1-(4-isopropylphenyl)pyrrolidin-2-one (**1o**)<sup>2</sup>

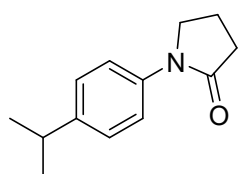

White solid, yield 77%.  $^1H$  NMR (400 MHz, Chloroform- $d$ )  $\delta$  7.50 (d,  $J = 8.4$  Hz, 2H), 7.23 (d,  $J = 8.4$  Hz, 2H), 3.85 (t,  $J = 7.0$  Hz, 2H), 2.89 (hept,  $J = 6.8$

Hz, 1H), 2.60 (t,  $J = 8.1$  Hz, 2H), 2.15 (p,  $J = 7.5$  Hz, 2H), 1.24 (d,  $J = 6.9$  Hz, 6H).

### methyl 4-(2-oxopyrrolidin-1-yl)benzoate (**1p**)<sup>5</sup>

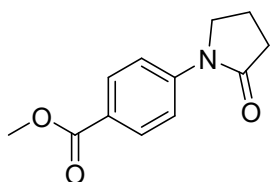

White solid, yield 44%. <sup>1</sup>H NMR (400 MHz, Chloroform-*d*)  $\delta$  8.04 (d,  $J = 8.8$  Hz, 2H), 7.73 (d,  $J = 8.8$  Hz, 2H), 4.00 – 3.83 (m, 5H), 2.65 (t,  $J = 8.1$  Hz, 2H), 2.19 (p,  $J = 7.6$  Hz, 2H).

### 1-(4-nitrophenyl)pyrrolidin-2-one (**1q**)<sup>6</sup>

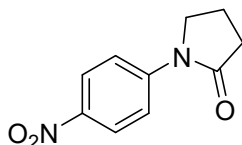

White solid, yield 23%. <sup>1</sup>H NMR (400 MHz, Chloroform-*d*)  $\delta$  8.24 (d,  $J = 9.3$  Hz, 2H), 7.85 (d,  $J = 9.3$  Hz, 2H), 3.94 (t,  $J = 7.1$  Hz, 2H), 2.68 (t,  $J = 8.1$  Hz, 2H), 2.24 (p,  $J = 7.6$  Hz, 2H).

### 1-(4-acetylphenyl)pyrrolidin-2-one (**1r**)<sup>7</sup>

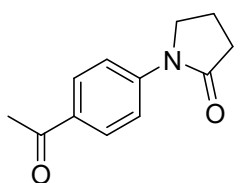

White solid, yield 34%. <sup>1</sup>H NMR (400 MHz, Chloroform-*d*)  $\delta$  7.98 (d,  $J = 8.8$  Hz, 2H), 7.76 (d,  $J = 8.9$  Hz, 2H), 3.91 (t,  $J = 7.0$  Hz, 2H), 2.66 (t,  $J = 8.1$  Hz, 2H), 2.59 (s, 3H), 2.20 (p,  $J = 7.6$  Hz, 2H).

### 1-(4-ethylphenyl)pyrrolidin-2-one (**1s**)<sup>2</sup>

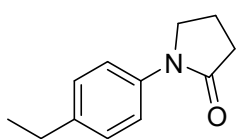

White solid, yield 75%. <sup>1</sup>H NMR (400 MHz, Chloroform-*d*)  $\delta$  7.50 (d,  $J = 8.4$  Hz, 2H), 7.19 (d,  $J = 8.4$  Hz, 2H), 3.85 (t,  $J = 7.0$  Hz, 2H), 2.70 – 2.49 (m, 4H), 2.15 (p,  $J = 7.5$  Hz, 2H), 1.22 (t,  $J = 7.6$  Hz, 3H).

### 1-(*p*-tolyl)pyrrolidin-2-one (**1t**)<sup>2</sup>

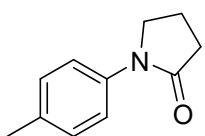

White solid, yield 78%. <sup>1</sup>H NMR (400 MHz, Chloroform-*d*)  $\delta$  7.48 (d,  $J = 8.4$  Hz, 2H), 7.17 (d,  $J = 8.4$  Hz, 2H), 3.84 (t,  $J = 7.0$  Hz, 2H), 2.60 (t,  $J = 8.1$  Hz, 2H), 2.33 (s, 3H), 2.15 (p,  $J = 7.6$  Hz, 2H). <sup>13</sup>C NMR (101 MHz, Chloroform-*d*)  $\delta$  174.1, 136.9, 134.2, 129.4, 120.1, 48.9, 32.7, 20.9, 18.1.

### 1-phenyl-5-(2,2,2-trifluoroethoxy)-1,5-dihydro-2*H*-pyrrol-2-one (**2a**)

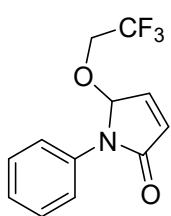

Slight yellow viscous liquid, yield 59%. <sup>1</sup>H NMR (400 MHz, Chloroform-*d*)  $\delta$  7.74 – 7.61 (m, 2H), 7.42 (t,  $J = 8.0$  Hz, 2H), 7.26 – 7.18 (m, 1H), 7.01 (dd,  $J = 6.1, 1.8$  Hz, 1H), 6.45 (d,  $J = 6.1$  Hz, 1H), 6.18 (s, 1H), 3.68 – 3.53 (m, 2H). <sup>13</sup>C NMR (151 MHz, Chloroform-*d*)  $\delta$  168.1, 141.9, 136.3, 131.8, 129.3, 125.5, 123.4 (q,  $J = 277.6$  Hz), 120.6, 88.1, 60.3 (q,  $J = 35.5$  Hz). <sup>19</sup>F NMR (376 MHz, CDCl<sub>3</sub>)  $\delta$  -73.96. HRMS(ESI)  $m/z$ : calculated for C<sub>12</sub>H<sub>11</sub>F<sub>3</sub>NO<sub>2</sub> [M+H]<sup>+</sup> 258.0736, found 258.0734.

### 1-(4-fluorophenyl)-5-(2,2,2-trifluoroethoxy)-1,5-dihydro-2*H*-pyrrol-2-one (**2b**)

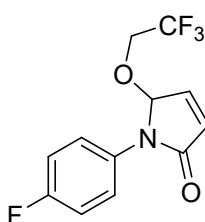

Slight yellow viscous liquid, yield 89%. <sup>1</sup>H NMR (400 MHz, Chloroform-*d*)  $\delta$  7.72 – 7.52 (m, 2H), 7.11 (t,  $J = 8.7$  Hz, 2H), 7.05 – 6.95 (m, 1H), 6.45 (d,  $J = 6.1$  Hz, 1H), 6.11 (s, 1H), 3.70 – 3.51 (m, 2H). <sup>13</sup>C NMR (101 MHz, Chloroform-*d*)  $\delta$

168.1, 160.2 (d,  $J = 245.6$  Hz), 141.9, 132.4 (d,  $J = 3.0$  Hz), 131.7, 123.3 (q,  $J = 277.6$  Hz), 122.6 (d,  $J = 8.1$  Hz), 116.1 (d,  $J = 22.6$  Hz), 88.3, 60.4 (q,  $J = 35.6$  Hz). HRMS(ESI)  $m/z$ : calculated for  $C_{12}H_{10}F_4NO_2$   $[M+H]^+$  276.0642, found 276.0639.

### 1-(3-fluorophenyl)-5-(2,2,2-trifluoroethoxy)-1,5-dihydro-2H-pyrrol-2-one(2c)

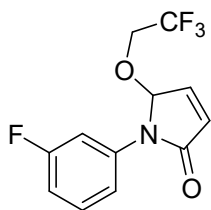

Slight yellow viscous liquid, yield 76%.  $^1H$  NMR (400 MHz, Chloroform- $d$ )  $\delta$  7.67 – 7.56 (m, 1H), 7.50 – 7.42 (m, 1H), 7.42 – 7.31 (m, 1H), 7.02 (dd,  $J = 6.0$ , 1.8 Hz, 1H), 6.96 – 6.87 (m, 1H), 6.51 – 6.39 (m, 1H), 6.15 (s, 1H), 3.69 – 3.50 (m, 2H).  $^{13}C$  NMR (101 MHz, Chloroform- $d$ )  $\delta$  168.0, 163.1 (d,  $J = 245.4$  Hz), 142.1, 137.9 (d,  $J = 10.6$  Hz), 131.8, 130.4 (d,  $J = 9.3$  Hz), 123.3 (q,  $J = 277.6$  Hz), 115.1 (d,  $J = 3.1$  Hz), 112.1 (d,  $J = 21.2$  Hz), 107.5 (d,  $J = 26.5$  Hz), 87.9, 60.1 (q,  $J = 35.7$  Hz).

HRMS(ESI)  $m/z$ : calculated for  $C_{12}H_{10}F_4NO_2$   $[M+H]^+$  276.0642, found 276.0630.

### 1-(2-fluorophenyl)-5-(2,2,2-trifluoroethoxy)-1,5-dihydro-2H-pyrrol-2-one(2d)

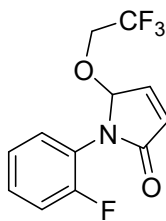

Slight yellow viscous liquid, yield 82%.  $^1H$  NMR (400 MHz, Chloroform- $d$ )  $\delta$  7.45 – 7.29 (m, 2H), 7.26 – 7.16 (m, 2H), 7.08 (d,  $J = 6.0$  Hz, 1H), 6.48 (d,  $J = 6.0$  Hz, 1H), 6.11 (s, 1H), 3.71 (q,  $J = 8.4$  Hz, 2H).  $^{13}C$  NMR (101 MHz, Chloroform- $d$ )  $\delta$  168.2, 157.6 (d,  $J = 249.9$  Hz), 143.5, 130.9, 129.4 (d,  $J = 8.1$  Hz), 128.7 (d,  $J = 1.1$  Hz), 124.9 (d,  $J = 3.7$  Hz), 123.3 (q,  $J = 277.9$  Hz), 122.7 (d,  $J = 11.9$  Hz), 116.8 (d,  $J = 20.2$  Hz), 89.4 (d,  $J = 4.7$  Hz), 61.7 (q,  $J = 35.4$  Hz). HRMS(ESI)  $m/z$ : calculated for  $C_{12}H_{10}F_4NO_2$   $[M+H]^+$  276.0642, found 276.0641.

### 1-(4-chlorophenyl)-5-(2,2,2-trifluoroethoxy)-1,5-dihydro-2H-pyrrol-2-one(2e)

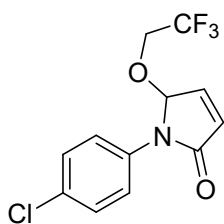

Slight yellow viscous liquid, yield 86%.  $^1H$  NMR (400 MHz, Chloroform- $d$ )  $\delta$  7.67 (d,  $J = 8.9$  Hz, 2H), 7.38 (d,  $J = 8.9$  Hz, 2H), 7.07 – 6.94 (m, 1H), 6.45 (d,  $J = 6.1$  Hz, 1H), 6.14 (s, 1H), 3.67 – 3.49 (m, 2H).  $^{13}C$  NMR (101 MHz, Chloroform- $d$ )  $\delta$  167.9, 141.9, 135.0, 131.8, 130.7, 129.4, 123.3 (q,  $J = 277.6$  Hz), 121.4, 87.9, 60.2 (q,  $J = 35.7$  Hz). HRMS(ESI)  $m/z$ : calculated for  $C_{12}H_{10}ClF_3NO_2$   $[M+H]^+$  292.0347, found 292.0344.

### 1-(3-chlorophenyl)-5-(2,2,2-trifluoroethoxy)-1,5-dihydro-2H-pyrrol-2-one(2f)

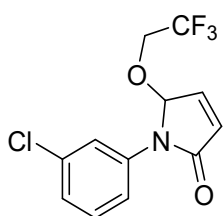

Slight yellow viscous liquid, yield 79%.  $^1H$  NMR (400 MHz, Chloroform- $d$ )  $\delta$  7.82 (s, 1H), 7.58 (d,  $J = 8.1$  Hz, 1H), 7.34 (t,  $J = 8.1$  Hz, 1H), 7.19 (d,  $J = 8.0$  Hz, 1H), 7.03 (d,  $J = 6.0$  Hz, 1H), 6.45 (d,  $J = 6.0$  Hz, 1H), 6.15 (s, 1H), 3.68 – 3.52 (m, 2H).  $^{13}C$  NMR (101 MHz, Chloroform- $d$ )  $\delta$  167.9, 142.1, 137.6, 135.0, 131.8, 130.3, 125.4, 123.3 (q,  $J = 277.6$  Hz), 120.2, 117.9, 87.8, 60.2 (q,  $J = 35.7$  Hz). HRMS(ESI)  $m/z$ : calculated for  $C_{12}H_{10}ClF_3NO_2$   $[M+H]^+$  292.0347, found 292.0343.

### 1-(4-bromophenyl)-5-(2,2,2-trifluoroethoxy)-1,5-dihydro-2H-pyrrol-2-one(2g)

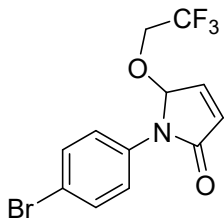

Slight yellow viscous liquid, yield 71%.  $^1H$  NMR (400 MHz, Chloroform- $d$ )  $\delta$  7.62 (d,  $J = 8.9$  Hz, 2H), 7.52 (d,  $J = 8.9$  Hz, 2H), 7.02 (d,  $J = 5.9$  Hz, 1H), 6.44 (d,  $J = 6.0$  Hz, 1H), 6.14 (s, 1H), 3.69 – 3.46 (m, 2H).  $^{13}C$  NMR (101 MHz, Chloroform- $d$ )  $\delta$  167.9, 141.9, 135.6, 132.3, 131.9, 123.3 (q,  $J = 277.6$  Hz), 121.6,

118.4, 87.8, 60.2 (q,  $J = 35.7$  Hz). HRMS(ESI)  $m/z$ : calculated for  $C_{12}H_{10}F_3BrNO_2$   $[M+H]^+$  335.9842, found 335.9840.

**1-(3-chloro-4-fluorophenyl)-5-(2,2,2-trifluoroethoxy)-1,5-dihydro-2H-pyrrol-2-one(2h)**

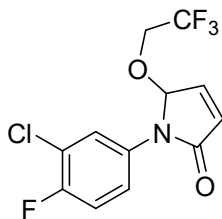

Slight yellow viscous liquid, yield 81%.  $^1H$  NMR (400 MHz, Chloroform- $d$ )  $\delta$  7.87 (dd,  $J = 6.4, 2.6$  Hz, 1H), 7.62 – 7.51 (m, 1H), 7.18 (t,  $J = 8.8$  Hz, 1H), 7.03 (d,  $J = 6.0$  Hz, 1H), 6.45 (d,  $J = 6.0$  Hz, 1H), 6.10 (s, 1H), 3.69 – 3.52 (m, 2H).  $^{13}C$  NMR (101 MHz, Chloroform- $d$ )  $\delta$  167.9, 155.5 (d,  $J = 247.9$  Hz), 142.1, 133.1 (d,  $J = 3.4$  Hz), 131.7, 123.2 (q,  $J = 277.6$  Hz), 122.6, 121.6 (d,  $J = 18.6$  Hz), 119.9 (d,  $J = 7.0$  Hz), 116.9 (d,  $J = 22.1$  Hz), 88.1, 60.3 (q,  $J = 35.7$  Hz).

HRMS(ESI)  $m/z$ : calculated for  $C_{12}H_8ClF_4NO_2Na$   $[M+Na]^+$  332.0072, found 332.0088.

**1-(4-chloro-2-fluorophenyl)-5-(2,2,2-trifluoroethoxy)-1,5-dihydro-2H-pyrrol-2-one(2i)**

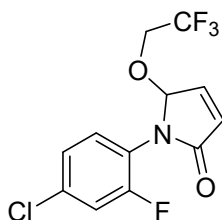

Slight yellow viscous liquid, yield 70%.  $^1H$  NMR (400 MHz, Chloroform- $d$ )  $\delta$  7.34 (t,  $J = 8.4$  Hz, 1H), 7.26 – 7.19 (m, 2H), 7.12 – 7.06 (m, 1H), 6.47 (d,  $J = 6.0$  Hz, 1H), 6.08 (s, 1H), 3.70 (q,  $J = 8.3$  Hz, 2H).  $^{13}C$  NMR (101 MHz, Chloroform- $d$ )  $\delta$  167.9, 157.2 (d,  $J = 253.4$  Hz), 143.6, 134.3 (d,  $J = 10.0$  Hz), 130.9, 129.3 (d,  $J = 2.1$  Hz), 125.4 (d,  $J = 3.7$  Hz), 123.2 (q,  $J = 277.9$  Hz), 121.5 (d,  $J = 12.0$  Hz), 117.7 (d,  $J = 23.6$  Hz), 89.2, 61.8 (q,  $J = 35.5$  Hz). HRMS(ESI)

$m/z$ : calculated for  $C_{12}H_8ClF_4NO_2Na$   $[M+Na]^+$  332.0072, found 332.0084.

**1-(3,5-difluorophenyl)-5-(2,2,2-trifluoroethoxy)-1,5-dihydro-2H-pyrrol-2-one(2j)**

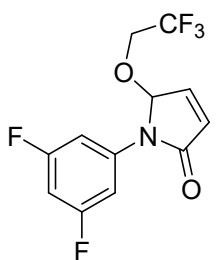

Slight yellow viscous liquid, yield 73%.  $^1H$  NMR (400 MHz, Chloroform- $d$ )  $\delta$  7.42 (d,  $J = 7.4$  Hz, 2H), 7.04 (d,  $J = 6.0$  Hz, 1H), 6.65 (t,  $J = 8.7$  Hz, 1H), 6.45 (d,  $J = 6.1$  Hz, 1H), 6.12 (s, 1H), 3.70 – 3.49 (m, 2H).  $^{13}C$  NMR (101 MHz, Chloroform- $d$ )  $\delta$  167.9, 163.3 (dd,  $J = 246.7, 14.6$  Hz), 142.2, 138.7 (t,  $J = 13.2$  Hz), 131.8, 123.2 (q,  $J = 277.6$  Hz), 102.5 (d,  $J = 30.3$  Hz), 100.3 (t,  $J = 25.5$  Hz), 87.7, 59.9 (q,  $J = 35.9$  Hz). HRMS(ESI)  $m/z$ : calculated for  $C_{12}H_9F_5NO_2$   $[M+H]^+$  294.0548, found 294.0547.

**1-(3,5-dichlorophenyl)-5-(2,2,2-trifluoroethoxy)-1,5-dihydro-2H-pyrrol-2-one(2k)**

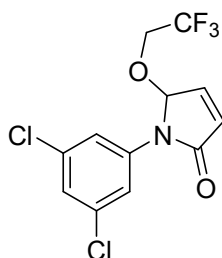

Slight yellow viscous liquid, yield 69%.  $^1H$  NMR (400 MHz, Chloroform- $d$ )  $\delta$  7.73 (d,  $J = 1.4$  Hz, 2H), 7.20 (s, 1H), 7.04 (d,  $J = 6.0$  Hz, 1H), 6.45 (d,  $J = 6.0$  Hz, 1H), 6.13 (s, 1H), 3.70 – 3.49 (m, 2H).  $^{13}C$  NMR (101 MHz, Chloroform- $d$ )  $\delta$  167.8, 142.3, 138.3, 135.6, 131.7, 125.2, 123.2 (q,  $J = 277.7$  Hz), 117.9, 87.7, 60.1 (q,  $J = 35.8$  Hz). HRMS(ESI)  $m/z$ : calculated for  $C_{12}H_8Cl_2F_3NO_2Na$   $[M+Na]^+$  347.9776, found 347.9778.

**5-(2,2,2-trifluoroethoxy)-1-(4-(trifluoromethyl)phenyl)-1,5-dihydro-2H-pyrrol-2-one(2l)**

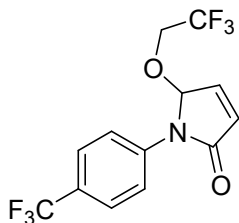

Slight yellow viscous liquid, yield 72%.  $^1H$  NMR (400 MHz, Chloroform- $d$ )  $\delta$  7.90 (d,  $J = 8.6$  Hz, 2H), 7.67 (d,  $J = 8.6$  Hz, 2H), 7.06 (d,  $J = 6.0$  Hz, 1H), 6.47

(d,  $J = 6.1$  Hz, 1H), 6.22 (s, 1H), 3.69 – 3.49 (m, 2H).  $^{13}\text{C}$  NMR (101 MHz, Chloroform- $d$ )  $\delta$  168.1, 142.2, 139.5, 131.9, 126.4 (q,  $J = 3.8$  Hz), 126.9 (q,  $J = 32.9$  Hz), 123.9 (q,  $J = 271.8$  Hz), 123.2 (q,  $J = 277.6$  Hz), 119.3, 87.6, 60.1 (q,  $J = 35.8$  Hz). HRMS(ESI)  $m/z$ : calculated for  $\text{C}_{13}\text{H}_9\text{F}_6\text{NO}_2\text{Na}$  [ $\text{M}+\text{Na}$ ] $^+$  348.0430, found 348.0434.

### 5-(2,2,2-trifluoroethoxy)-1-(3-(trifluoromethyl)phenyl)-1,5-dihydro-2H-pyrrol-2-one(2m)

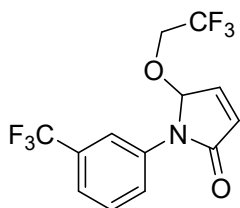

Slight yellow viscous liquid, yield 69%.  $^1\text{H}$  NMR (400 MHz, Chloroform- $d$ )  $\delta$  8.06 (s, 1H), 7.93 (d,  $J = 8.1$  Hz, 1H), 7.54 (t,  $J = 8.0$  Hz, 1H), 7.46 (d,  $J = 7.7$  Hz, 1H), 7.10 – 7.02 (m, 1H), 6.47 (d,  $J = 6.1$  Hz, 1H), 6.21 (s, 1H), 3.71 – 3.51 (m, 2H).  $^{13}\text{C}$  NMR (101 MHz, Chloroform- $d$ )  $\delta$  168.0, 142.2, 137.1, 131.8, 131.7 (q,  $J = 32.7$  Hz), 129.8, 123.8 (q,  $J = 272.5$  Hz), 123.2 (q,  $J = 277.6$  Hz), 122.9, 121.8 (q,  $J = 3.8$  Hz), 116.7 (q,  $J = 4.0$  Hz), 87.8, 60.2 (q,  $J = 35.8$  Hz).

HRMS(ESI)  $m/z$ : calculated for  $\text{C}_{13}\text{H}_9\text{F}_6\text{NO}_2\text{Na}$  [ $\text{M}+\text{Na}$ ] $^+$  348.0430, found 348.0428.

### 1-(4-(tert-butyl)phenyl)-5-(2,2,2-trifluoroethoxy)-1,5-dihydro-2H-pyrrol-2-one(2n)

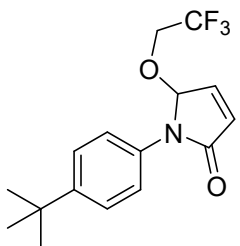

Slight yellow viscous liquid, yield 42%.  $^1\text{H}$  NMR (400 MHz, Chloroform- $d$ )  $\delta$  7.55 (d,  $J = 8.9$  Hz, 2H), 7.43 (d,  $J = 8.9$  Hz, 2H), 6.98 (dd,  $J = 6.1, 1.7$  Hz, 1H), 6.43 (dd,  $J = 6.1, 0.8$  Hz, 1H), 6.12 (s, 1H), 3.62 (q,  $J = 8.4$  Hz, 2H), 1.32 (s, 9H).  $^{13}\text{C}$  NMR (101 MHz, Chloroform- $d$ )  $\delta$  168.2, 148.6, 141.9, 133.7, 131.8, 126.2, 123.5 (q,  $J = 277.6$  Hz), 120.7, 88.4, 60.3 (q,  $J = 35.4$  Hz), 34.5, 31.3. HRMS(ESI)  $m/z$ : calculated for  $\text{C}_{16}\text{H}_{19}\text{F}_3\text{NO}_2$  [ $\text{M}+\text{H}$ ] $^+$  314.1362, found 314.1363.

### 1-(4-isopropylphenyl)-5-(2,2,2-trifluoroethoxy)-1,5-dihydro-2H-pyrrol-2-one (2o)

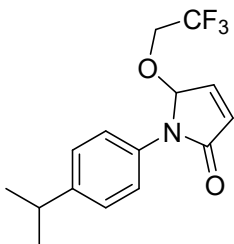

Slight yellow viscous liquid, yield 19%.  $^1\text{H}$  NMR (400 MHz, Chloroform- $d$ )  $\delta$  7.54 (d,  $J = 8.5$  Hz, 2H), 7.27 (d,  $J = 8.5$  Hz, 2H), 6.99 (d,  $J = 6.0$  Hz, 1H), 6.43 (d,  $J = 5.9$  Hz, 1H), 6.12 (s, 1H), 3.62 (q,  $J = 8.4$  Hz, 2H), 2.91 (hept,  $J = 6.7$  Hz, 1H), 1.25 (d,  $J = 6.9$  Hz, 6H).  $^{13}\text{C}$  NMR (101 MHz, Chloroform- $d$ )  $\delta$  168.2, 146.4, 141.9, 133.9, 131.8, 127.3, 123.4 (q,  $J = 277.7$  Hz), 121.1, 88.4, 60.4 (q,  $J = 35.5$  Hz), 33.7, 23.9. HRMS(ESI)  $m/z$ : calculated for  $\text{C}_{15}\text{H}_{17}\text{F}_3\text{NO}_2$  [ $\text{M}+\text{H}$ ] $^+$  300.1206, found 300.1204.

### methyl 4-(2-oxo-5-(2,2,2-trifluoroethoxy)-2,5-dihydro-1H-pyrrol-1-yl)benzoate(2p)

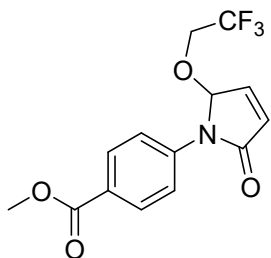

Slight yellow viscous liquid, yield 73%.  $^1\text{H}$  NMR (400 MHz, Chloroform- $d$ )  $\delta$  8.08 (d,  $J = 8.7$  Hz, 2H), 7.86 (d,  $J = 8.7$  Hz, 2H), 7.06 (d,  $J = 6.0$  Hz, 1H), 6.47 (d,  $J = 6.1$  Hz, 1H), 6.24 (s, 1H), 3.92 (s, 3H), 3.69 – 3.50 (m, 2H).  $^{13}\text{C}$  NMR (151 MHz, Chloroform- $d$ )  $\delta$  168.0, 166.4, 142.2, 140.5, 131.9, 130.8, 126.4, 123.2 (q,  $J = 277.6$  Hz), 118.8, 87.5, 60.0 (q,  $J = 35.8$  Hz), 52.1. HRMS(ESI)  $m/z$ : calculated for  $\text{C}_{14}\text{H}_{13}\text{F}_3\text{NO}_4$  [ $\text{M}+\text{H}$ ] $^+$  316.0791, found 316.0792.

### 1-(4-nitrophenyl)-5-(2,2,2-trifluoroethoxy)-1,5-dihydro-2H-pyrrol-2-one (2q)

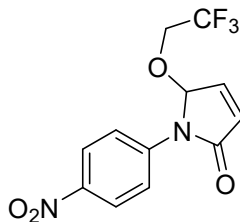

Slight yellow solid, yield 66%.  $^1\text{H}$  NMR (400 MHz, Chloroform- $d$ )  $\delta$  8.29 (d,  $J = 9.3$  Hz, 2H), 8.01 (d,  $J = 9.3$  Hz, 2H), 7.12 (dd,  $J = 6.1, 1.9$  Hz, 1H), 6.51

(d,  $J = 6.1$  Hz, 1H), 6.28 (s, 1H), 3.72 – 3.49 (m, 2H).  $^{13}\text{C}$  NMR (101 MHz, Chloroform- $d$ )  $\delta$  168.0, 143.9, 142.6, 142.2, 131.9, 125.0, 123.1 (q,  $J = 277.6$  Hz), 118.7, 87.4, 60.1 (q,  $J = 35.9$  Hz). HRMS(ESI)  $m/z$ : calculated for  $\text{C}_{12}\text{H}_8\text{F}_3\text{N}_2\text{O}_4$   $[\text{M}-\text{H}]^-$  301.0442, found 301.0440.

### 1-(4-acetylphenyl)-5-(2,2,2-trifluoroethoxy)-1,5-dihydro-2H-pyrrol-2-one (2r)

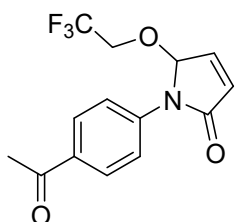

Slight yellow solid, yield 85%.  $^1\text{H}$  NMR (400 MHz, DMSO- $d_6$ )  $\delta$  8.01 (d,  $J = 8.7$  Hz, 2H), 7.83 (d,  $J = 8.7$  Hz, 2H), 7.43 (d,  $J = 6.0$  Hz, 1H), 6.59 (s, 1H), 6.54 (d,  $J = 6.2$  Hz, 1H), 4.11 – 3.86 (m, 2H), 2.57 (s, 3H).  $^{13}\text{C}$  NMR (101 MHz, DMSO- $d_6$ )  $\delta$  197.3, 168.6, 141.1, 133.1, 130.7, 129.7, 129.20 – 120.11 (m), 120.05, 87.6, 61.15 (q,  $J = 34.0$  Hz), 27.0.

### 5-(2,2,2-trifluoroethoxy)-1-(4-(1-(2,2,2-trifluoroethoxy)ethyl)phenyl)-1,5-dihydro-2H-pyrrol-2-one(2s)

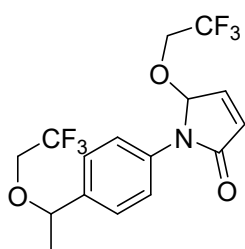

Slight yellow viscous liquid, yield 13%.  $^1\text{H}$  NMR (400 MHz, Chloroform- $d$ )  $\delta$  7.68 (dd,  $J = 8.7, 2.2$  Hz, 2H), 7.37 (d,  $J = 8.6$  Hz, 2H), 7.02 (dd,  $J = 6.1, 1.7$  Hz, 1H), 6.46 (dd,  $J = 6.1, 0.8$  Hz, 1H), 6.17 (s, 1H), 4.58 (qd,  $J = 6.4, 2.2$  Hz, 1H), 3.80 – 3.51 (m, 4H), 1.50 (dd,  $J = 6.5, 1.3$  Hz, 3H).  $^{13}\text{C}$  NMR (151 MHz, Chloroform- $d$ )  $\delta$  168.1, 142.9, 138.9 (d,  $J = 4.0$  Hz), 136.1 (d,  $J = 6.4$  Hz), 131.8, 130.2, 127.2 (d,  $J = 4.2$  Hz), 124.0 (q,  $J = 278.9$  Hz), 123.3 (q,  $J = 277.6$  Hz), 120.8, 120.8, 88.0 (d,  $J = 2.4$  Hz), 79.0 (d,  $J = 2.6$  Hz), 65.8 (q,  $J = 34.0$  Hz), 60.2 (q,  $J = 35.3$  Hz), 23.7. HRMS(ESI)  $m/z$ : calculated for  $\text{C}_{16}\text{H}_{16}\text{F}_6\text{NO}_3$   $[\text{M}+\text{H}]^+$  384.1029, found 384.1029.

### 5-(2,2,2-trifluoroethoxy)-1-(4-((2,2,2-trifluoroethoxy)methyl)phenyl)-1,5-dihydro-2H-pyrrol-2-one(2t)

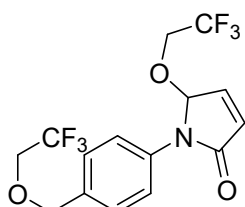

Slight yellow viscous liquid, yield 11%.  $^1\text{H}$  NMR (400 MHz, Chloroform- $d$ )  $\delta$  7.70 (d,  $J = 8.4$  Hz, 2H), 7.40 (d,  $J = 8.4$  Hz, 2H), 7.02 (d,  $J = 6.0$  Hz, 1H), 6.45 (d,  $J = 6.0$  Hz, 1H), 6.18 (s, 1H), 4.67 (s, 2H), 3.83 (q,  $J = 8.7$  Hz, 2H), 3.71 – 3.48 (m, 2H).  $^{13}\text{C}$  NMR (101 MHz, Chloroform- $d$ )  $\delta$  168.1, 141.9, 136.4, 133.5, 131.8, 128.9, 124.0 (q,  $J = 279.3$  Hz), 123.3 (q,  $J = 277.6$  Hz), 120.5, 87.9, 73.5, 67.2 (q,  $J = 34.1$  Hz), 60.2 (q,  $J = 35.6$  Hz). HRMS(ESI)  $m/z$ : calculated for  $\text{C}_{15}\text{H}_{14}\text{F}_6\text{NO}_3$   $[\text{M}+\text{H}]^+$  370.0872, found 370.0879.

### 1-(3-chloro-4-fluorophenyl)-4-(isopropylamino)-5-(2,2,2-trifluoroethoxy)pyrrolidin-2-one (3h)

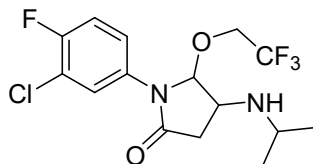

Slight yellow viscous liquid, yield 89%.  $^1\text{H}$  NMR (400 MHz, Chloroform- $d$ )  $\delta$  7.56 (dd,  $J = 6.6, 2.6$  Hz, 1H), 7.33 (ddd,  $J = 8.9, 4.1, 2.6$  Hz, 1H), 7.18 (t,  $J = 8.7$  Hz, 1H), 5.10 (s, 1H), 3.95 – 3.75 (m, 2H), 3.53 – 3.46 (m, 1H), 3.06 – 2.88 (m, 2H), 2.35 – 2.25 (m, 1H), 1.12 (t,  $J = 6.5$  Hz, 6H).  $^{13}\text{C}$  NMR (101 MHz, Chloroform- $d$ )  $\delta$  173.1, 156.7 (d,  $J = 249.5$  Hz), 133.8 (d,  $J = 3.7$  Hz), 126.7, 124.1 (d,  $J = 7.3$  Hz), 123.3 (q,  $J = 278.8$  Hz), 121.6 (d,  $J = 18.7$  Hz), 117.0 (d,  $J = 22.1$  Hz), 97.7, 65.5 (q,  $J = 35.1$  Hz), 53.9, 46.6, 37.4, 23.1. HRMS(ESI)  $m/z$ : calculated for  $\text{C}_{15}\text{H}_{18}\text{ClF}_4\text{N}_2\text{O}_2$   $[\text{M}+\text{H}]^+$  369.0987, found 369.0992.

**1-(4-chlorophenyl)-5-((1,1,1,3,3,3-hexafluoropropan-2-yl)oxy)-1,5-dihydro-2H-pyrrol-2-one (3e)**

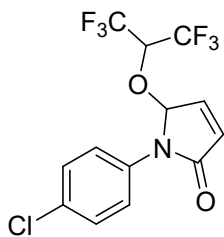

White solid, yield 92%.  $^1\text{H}$  NMR (400 MHz, Chloroform-*d*)  $\delta$  7.58 (d,  $J = 8.9$  Hz, 2H), 7.38 (d,  $J = 8.9$  Hz, 2H), 7.06 (d,  $J = 5.9$  Hz, 1H), 6.49 (d,  $J = 6.1$  Hz, 1H), 6.31 (s, 1H), 4.13 (hept,  $J = 5.6$  Hz, 1H).  $^{13}\text{C}$  NMR (101 MHz, Chloroform-*d*)  $\delta$  167.9, 140.9, 134.9, 132.1, 130.9, 129.2, 121.9, 120.9 (q,  $J = 285.8$ ), 120.8 (q,  $J = 284.8$ ), 88.9, 70.0 (hept,  $J = 67.0$ ). HRMS(ESI)  $m/z$ : calculated for  $\text{C}_{13}\text{H}_7\text{ClF}_6\text{NO}_2$   $[\text{M}-\text{H}]^-$  358.0075, found 358.0076.

**1-phenyl-1,5-dihydro-2H-pyrrol-2-one (compound e)<sup>1</sup>**

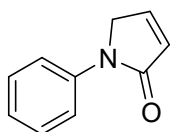

Brown solid, Yield 95%.  $^1\text{H}$  NMR (400 MHz, Chloroform-*d*)  $\delta$  7.71 (d,  $J = 8.0$  Hz, 2H), 7.38 (t,  $J = 8.0$  Hz, 2H), 7.18 (dt,  $J = 6.1, 1.9$  Hz, 1H), 7.14 (t,  $J = 6.1$  Hz, 1H), 6.28 (dt,  $J = 6.0, 1.9$  Hz, 1H), 4.45 (t,  $J = 1.9$  Hz, 2H).

**9. NMR Spectra**

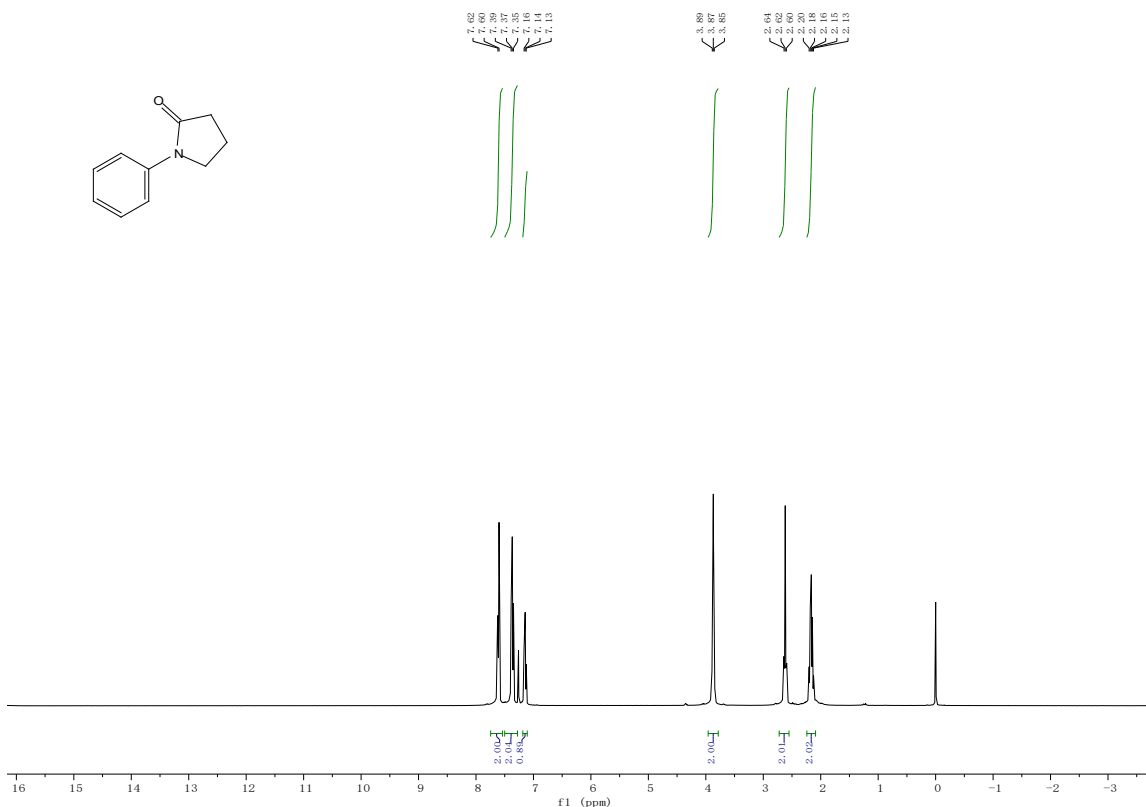

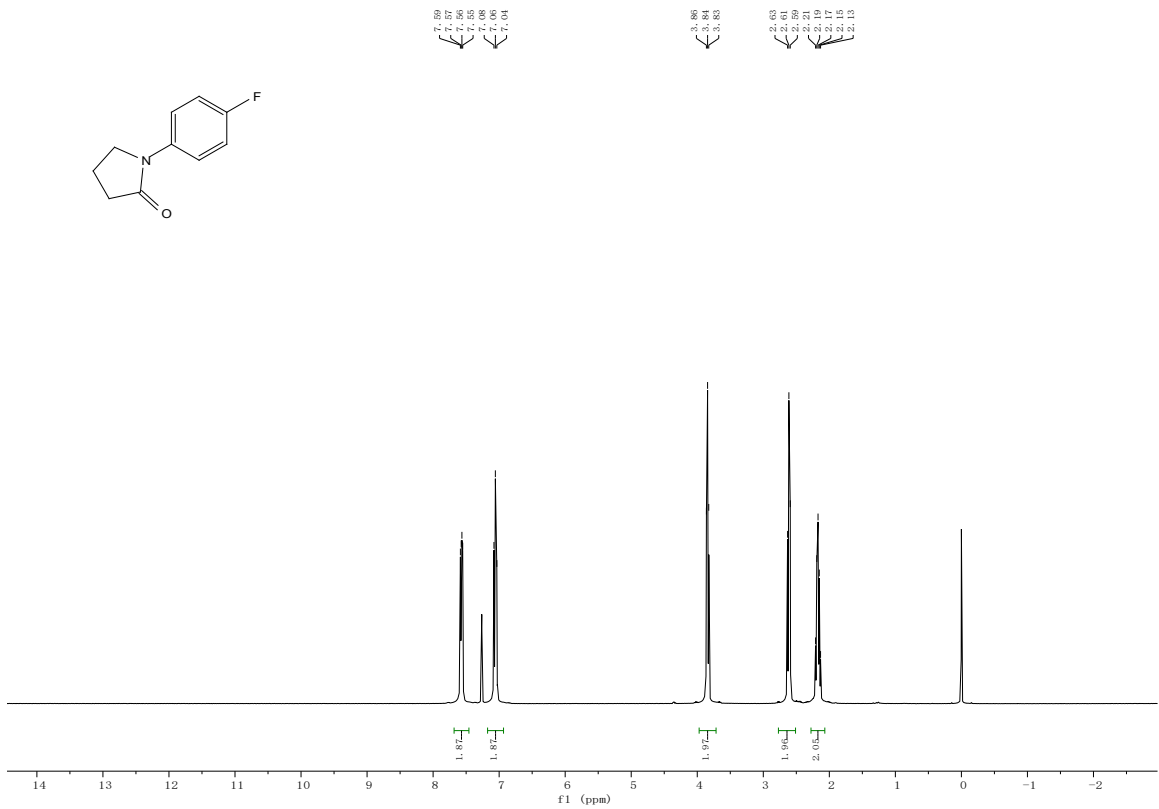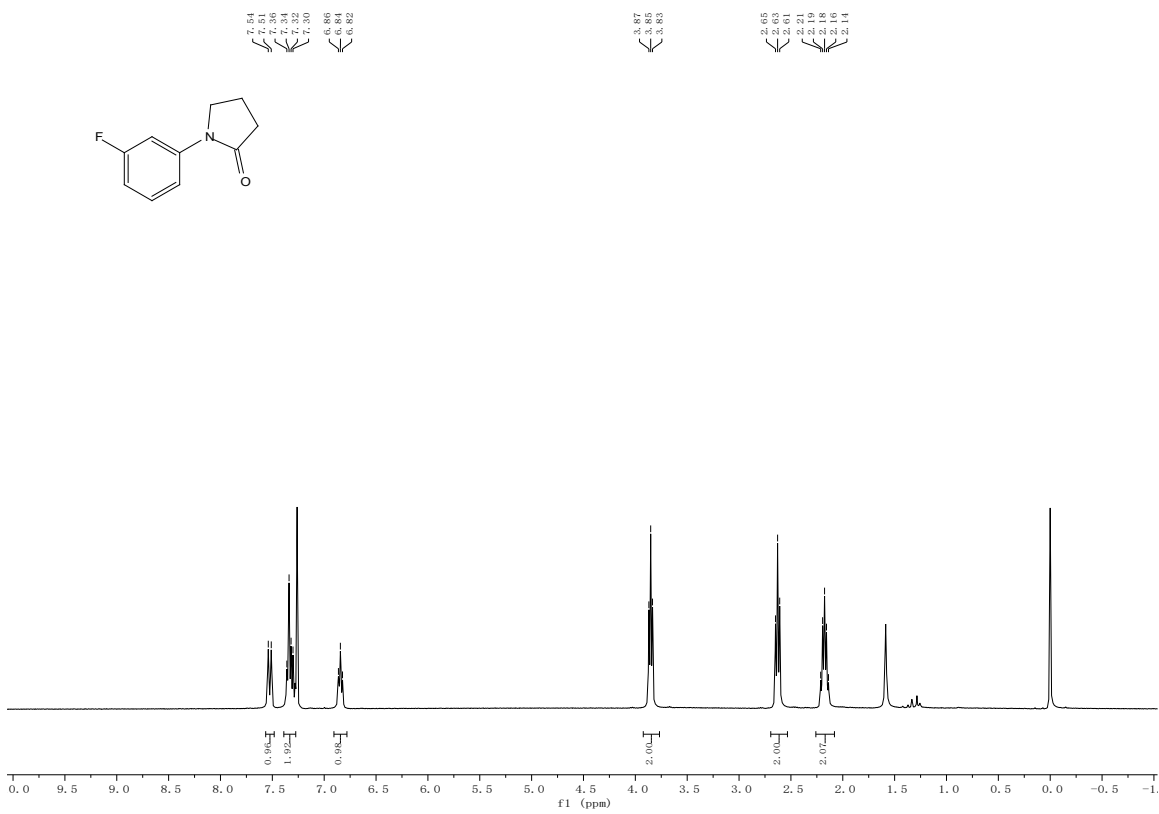



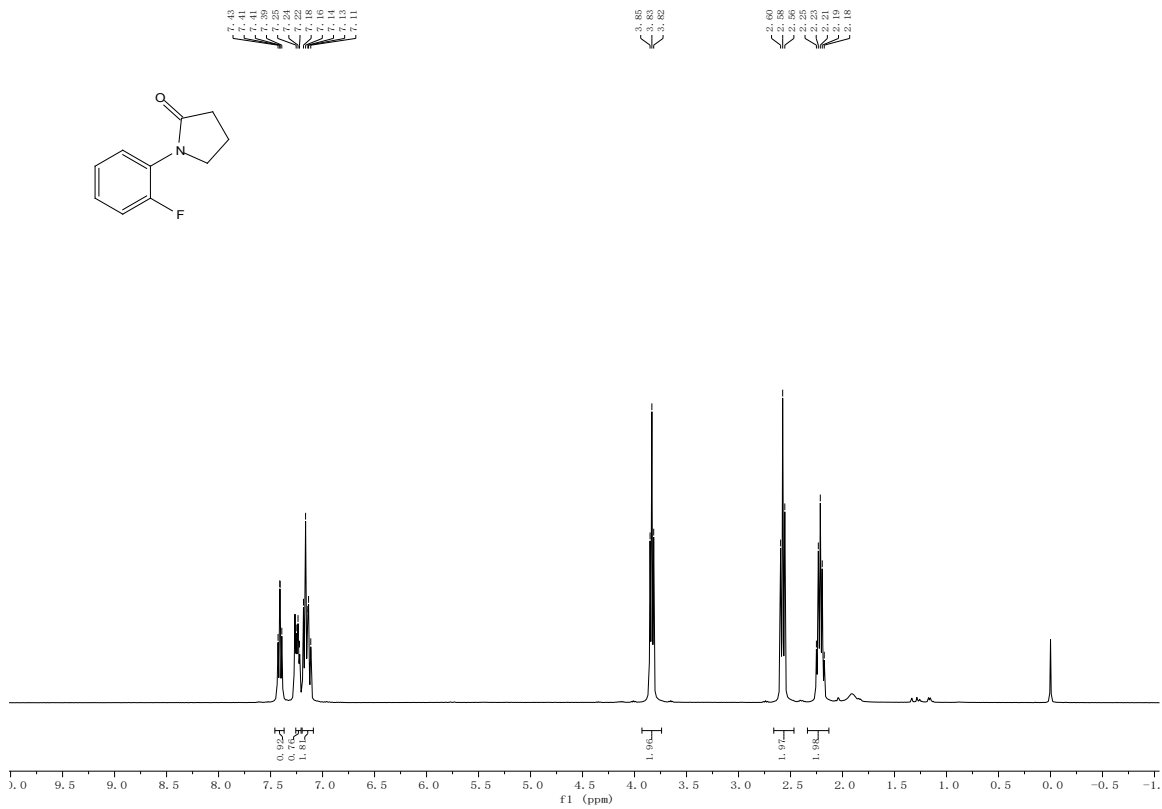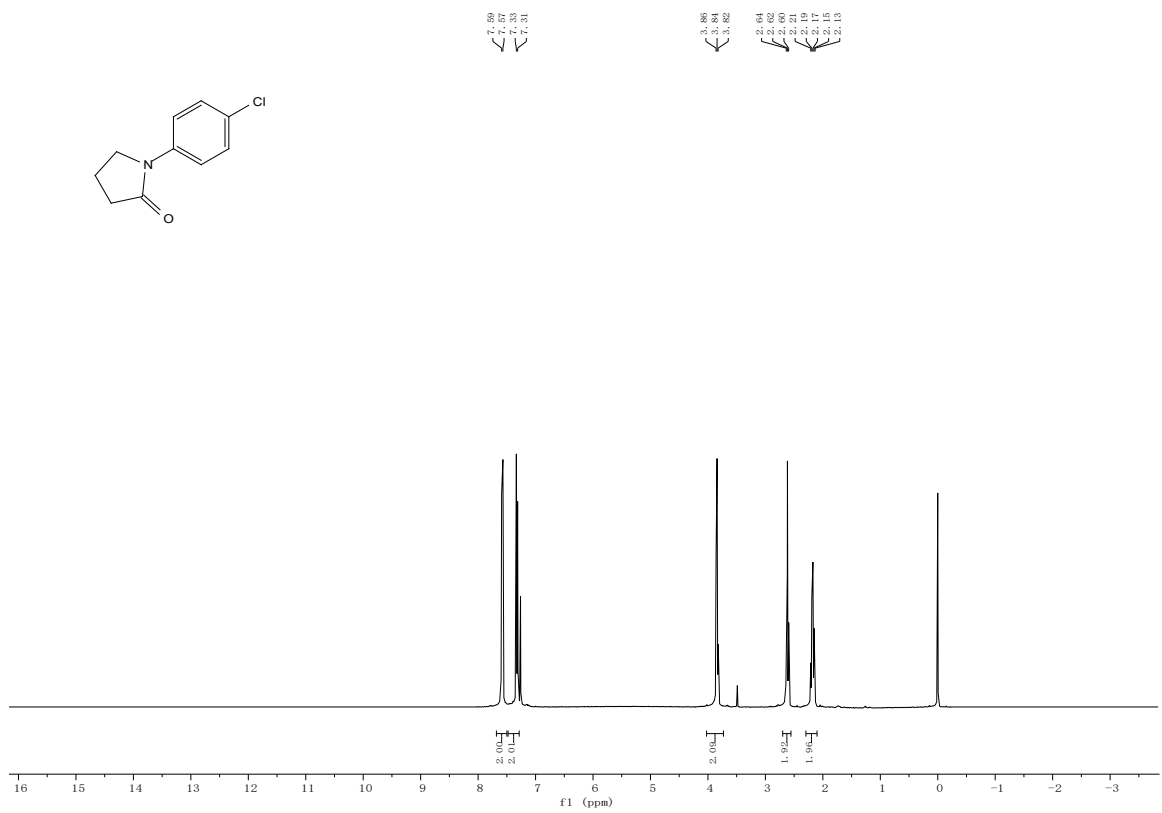

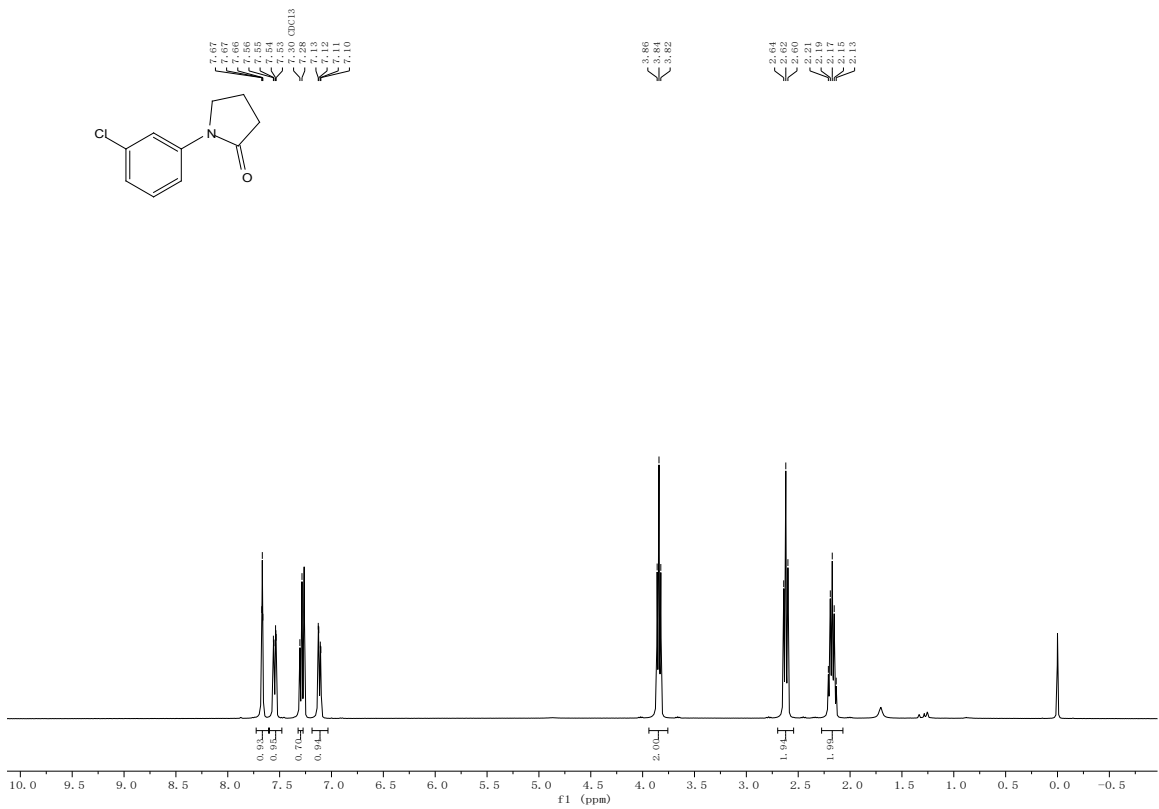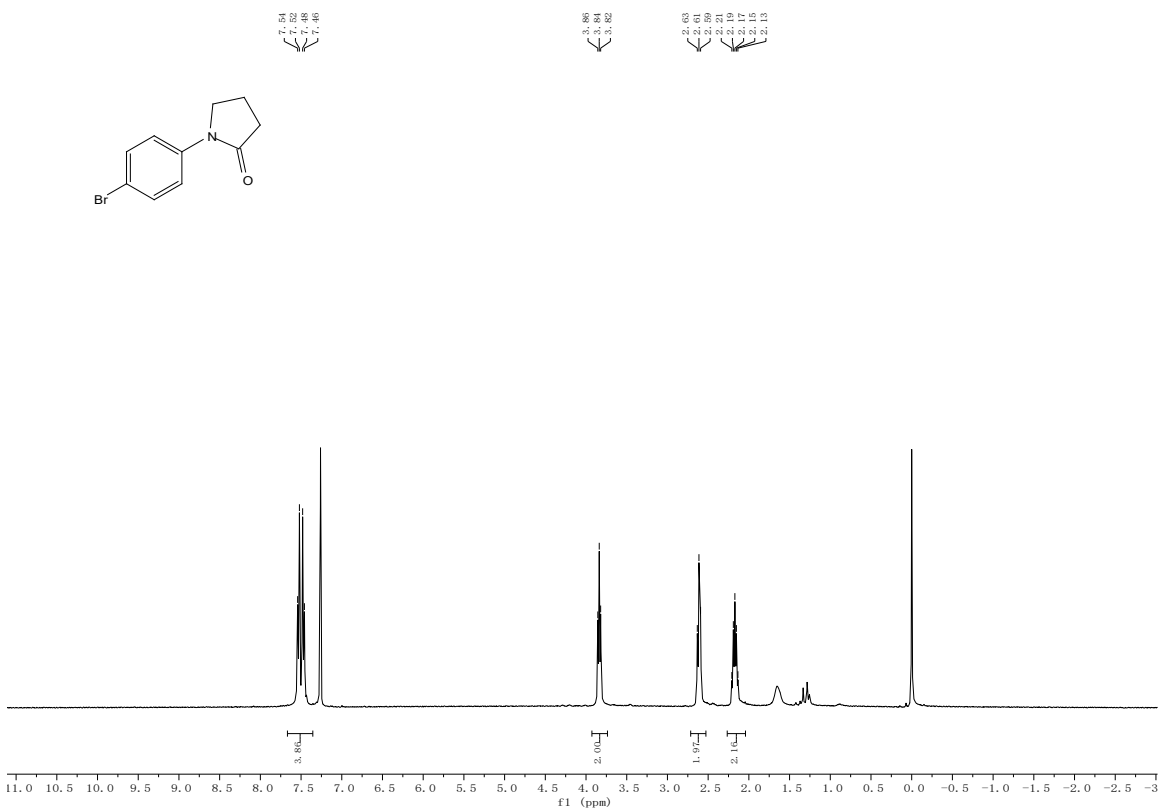

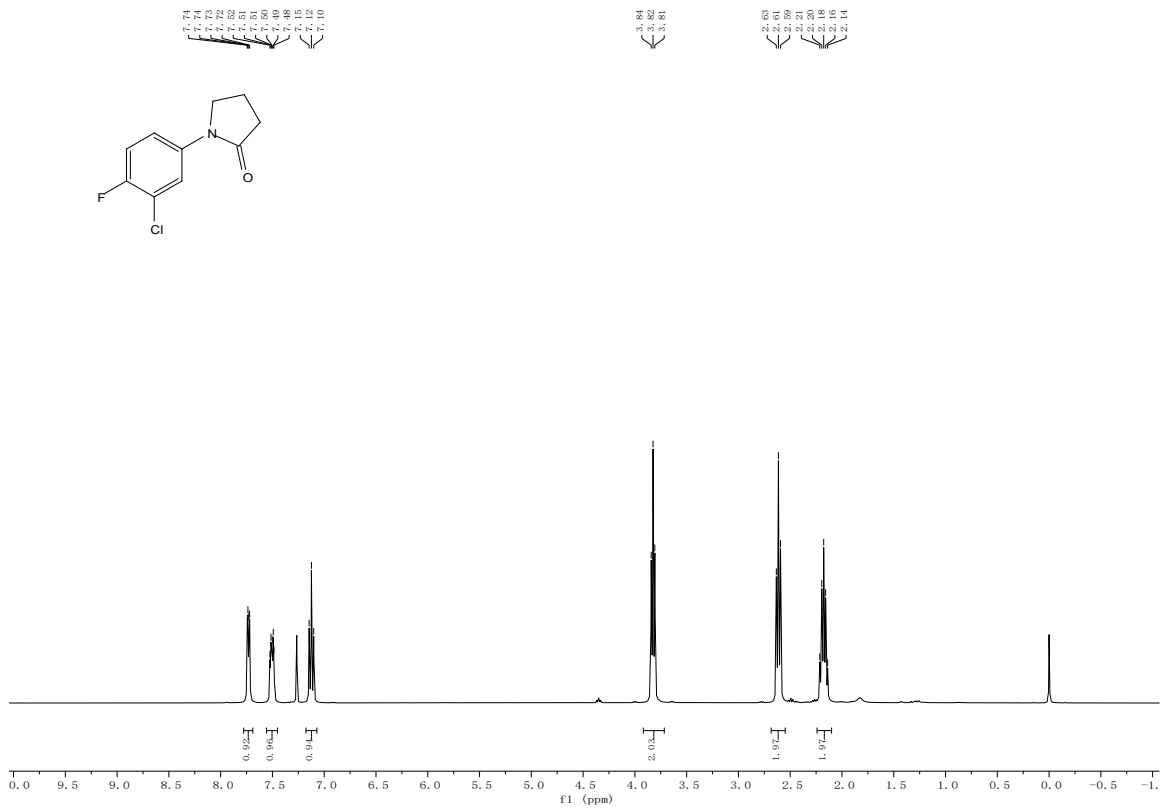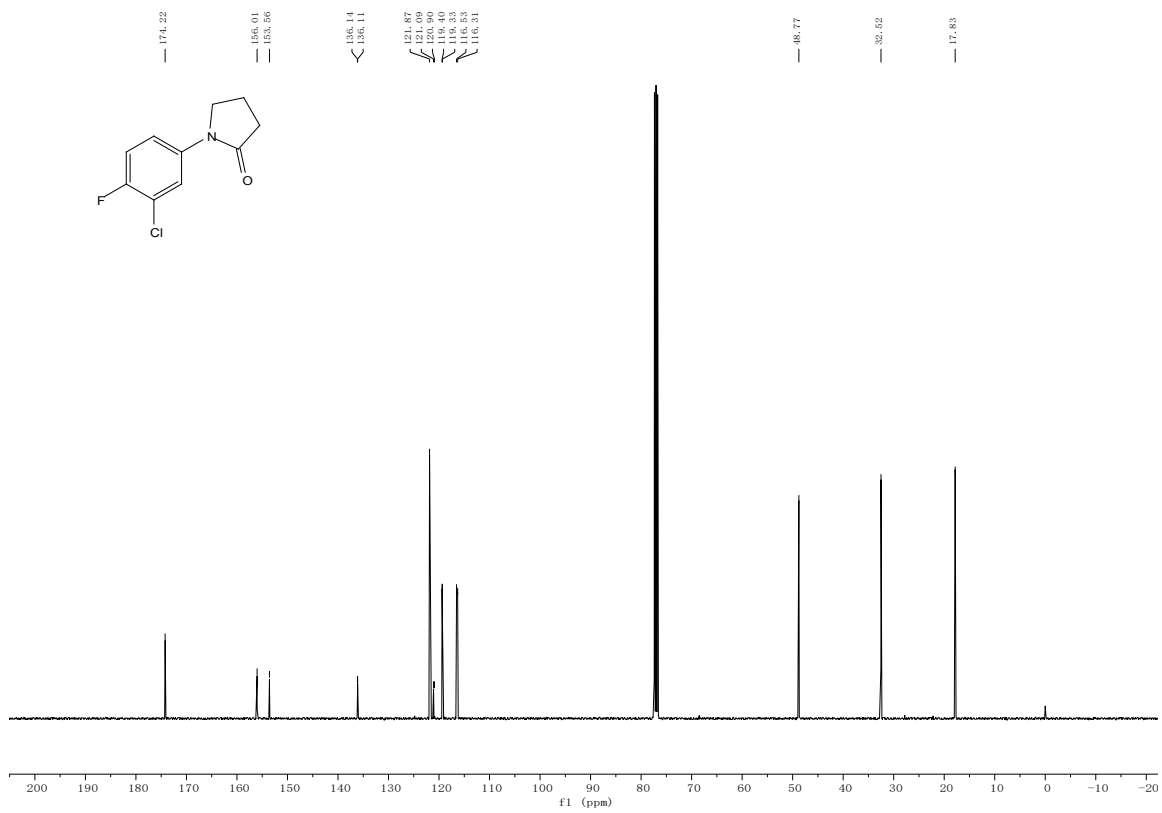

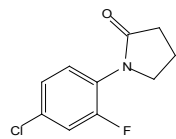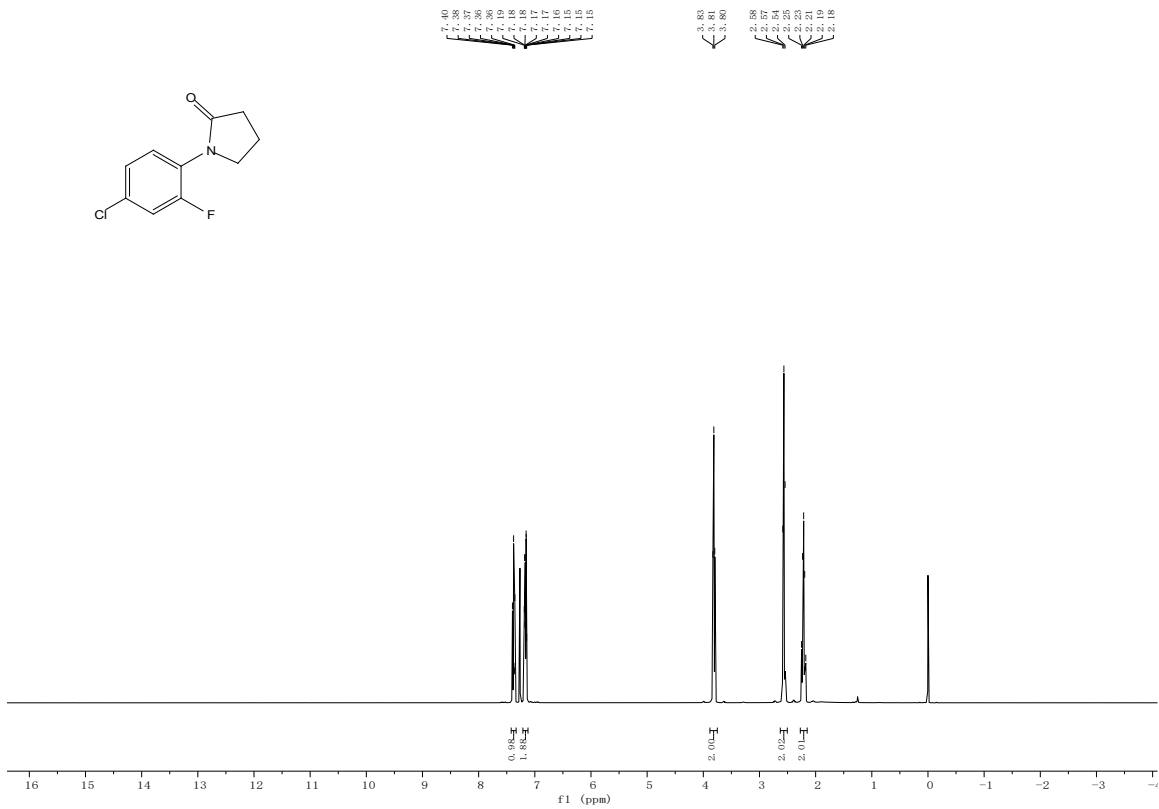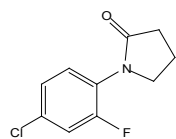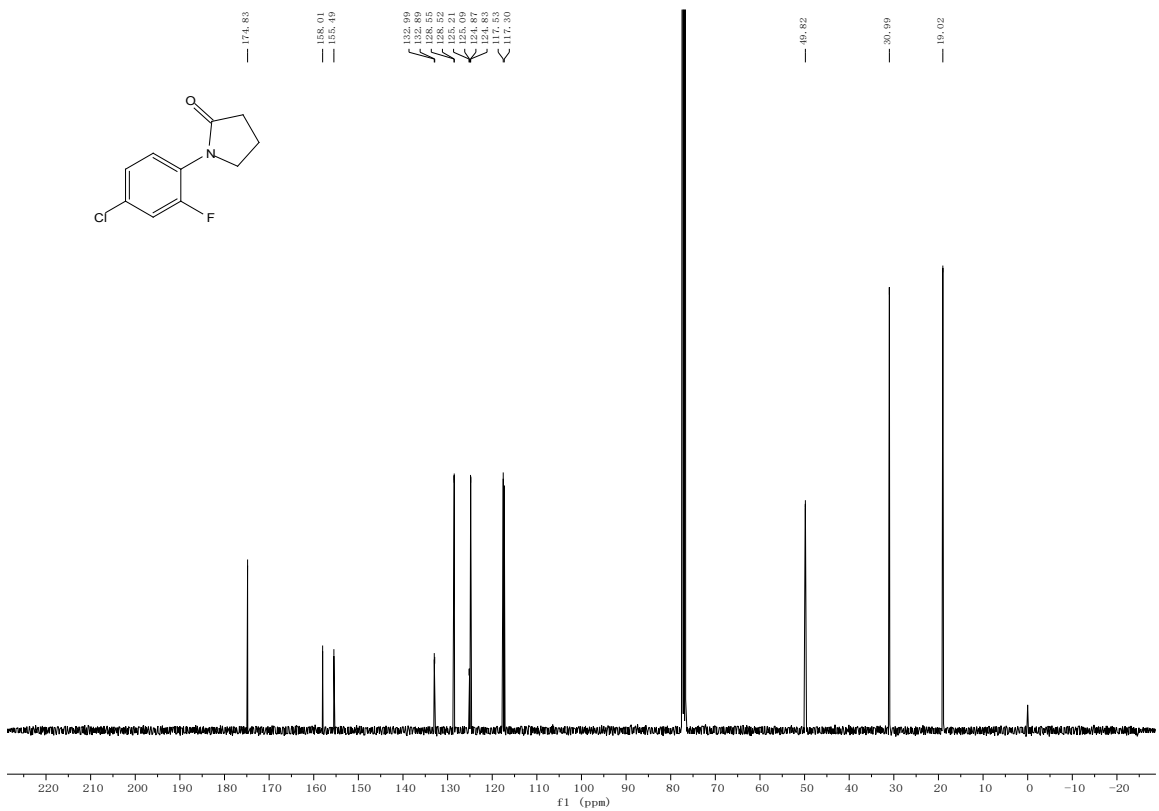

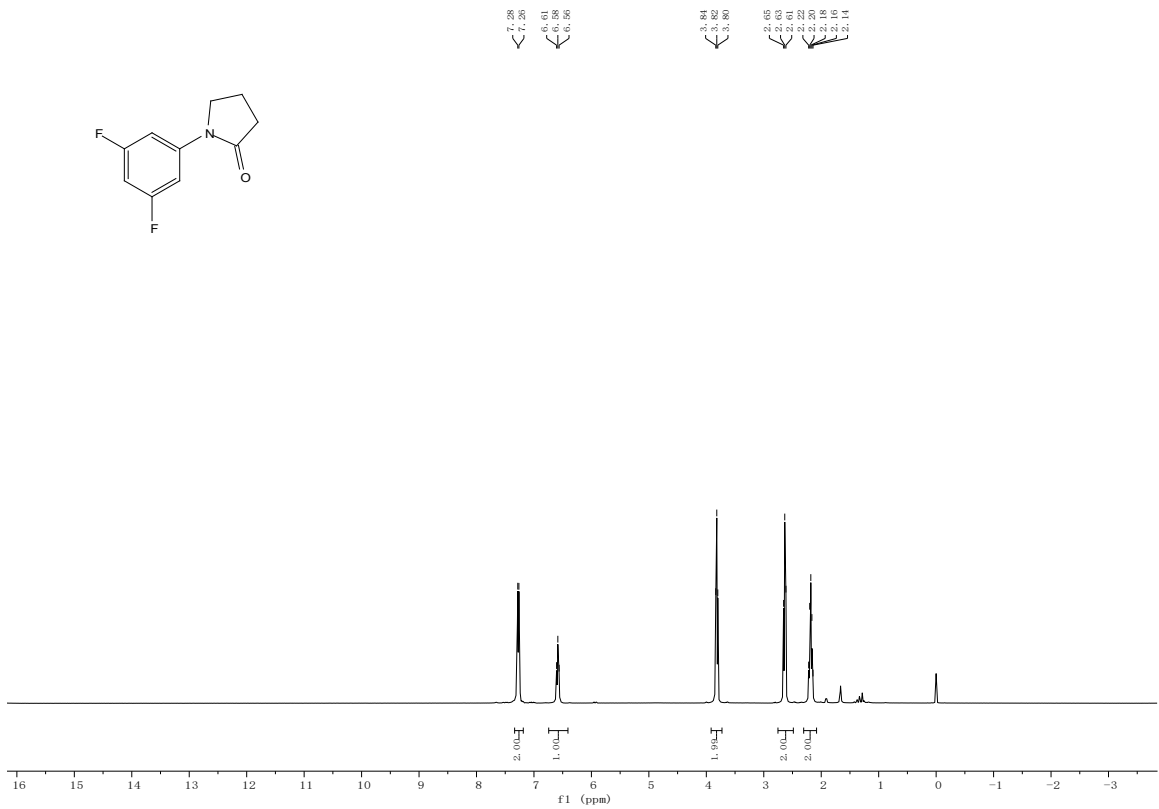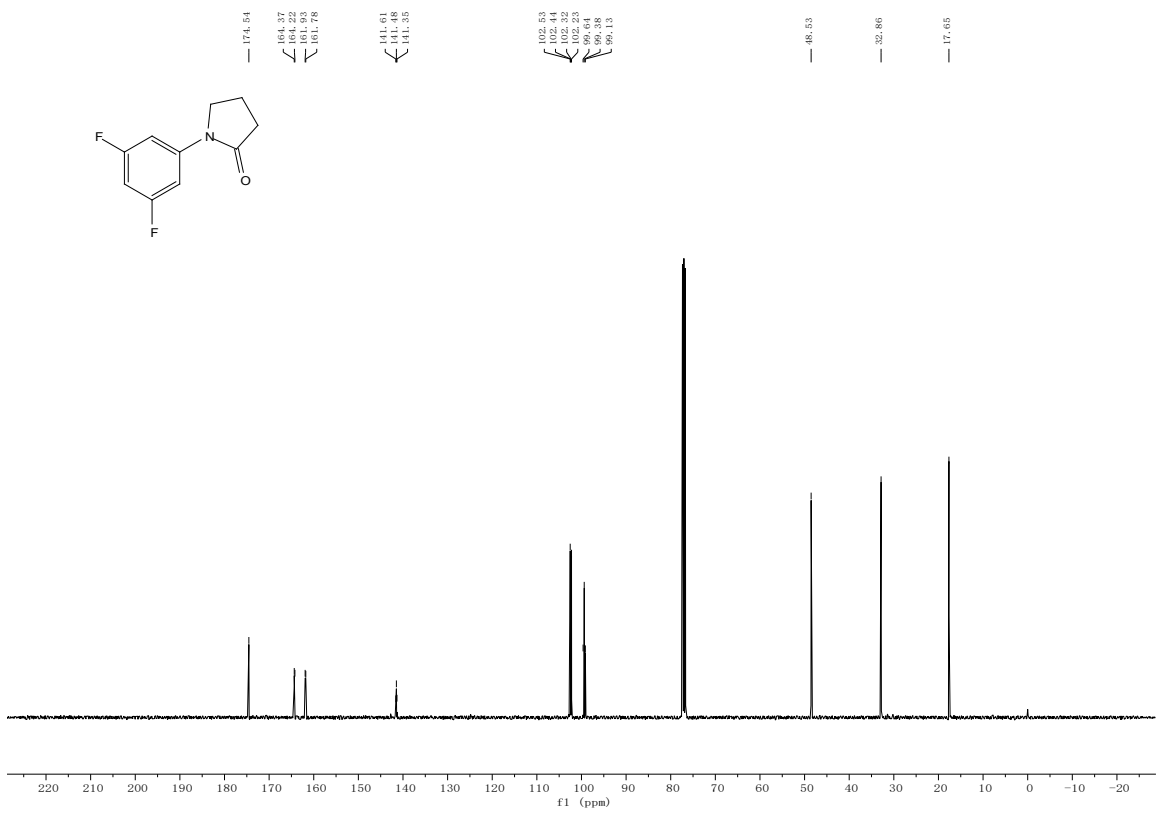

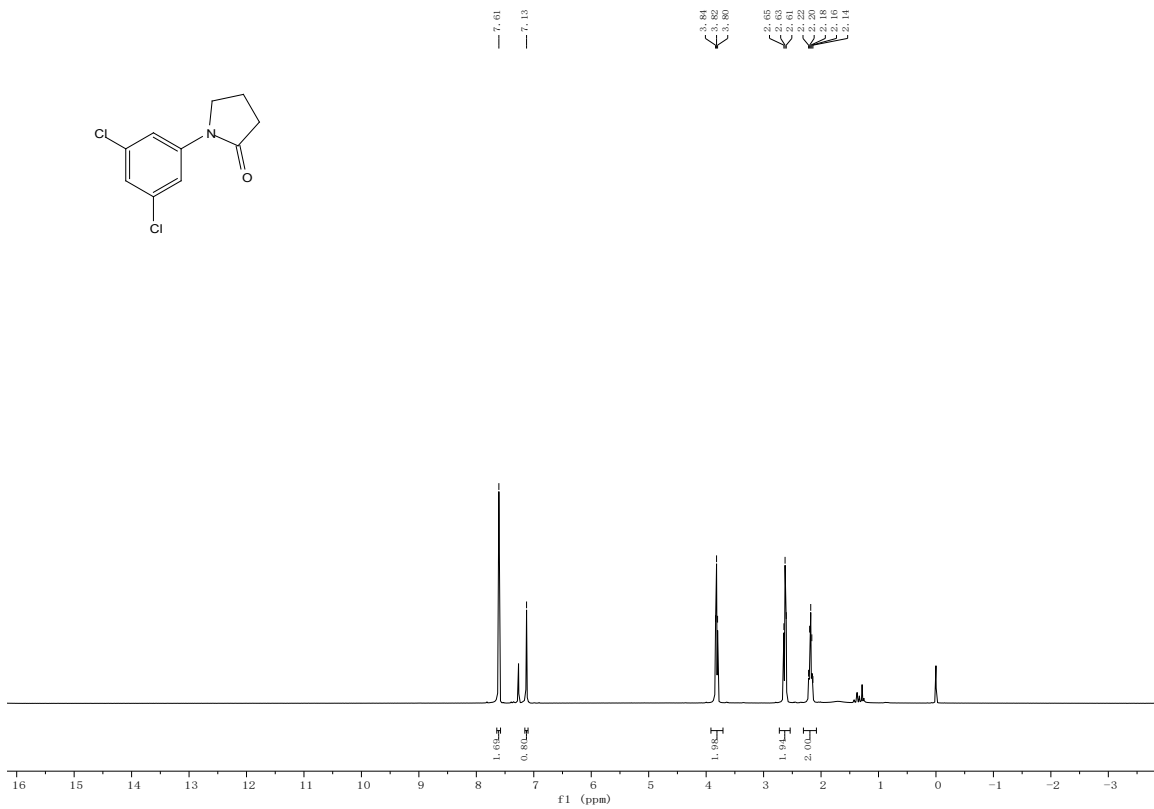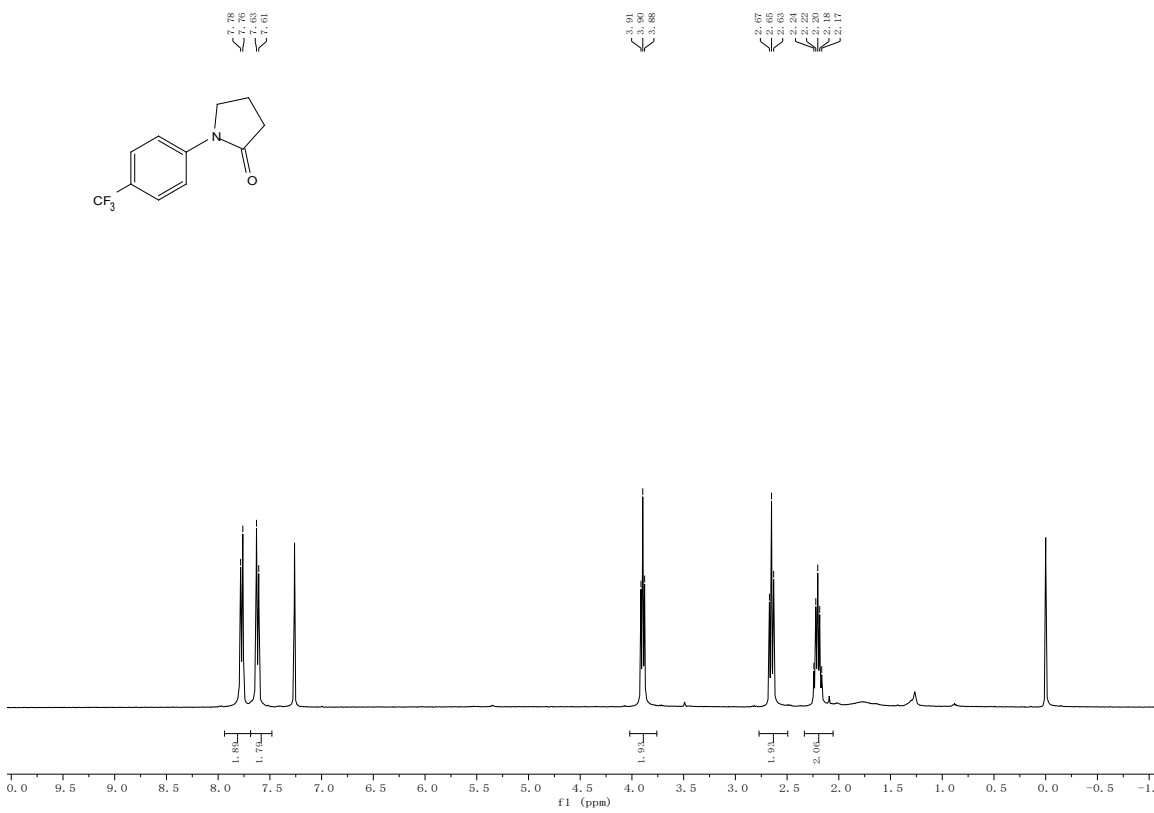

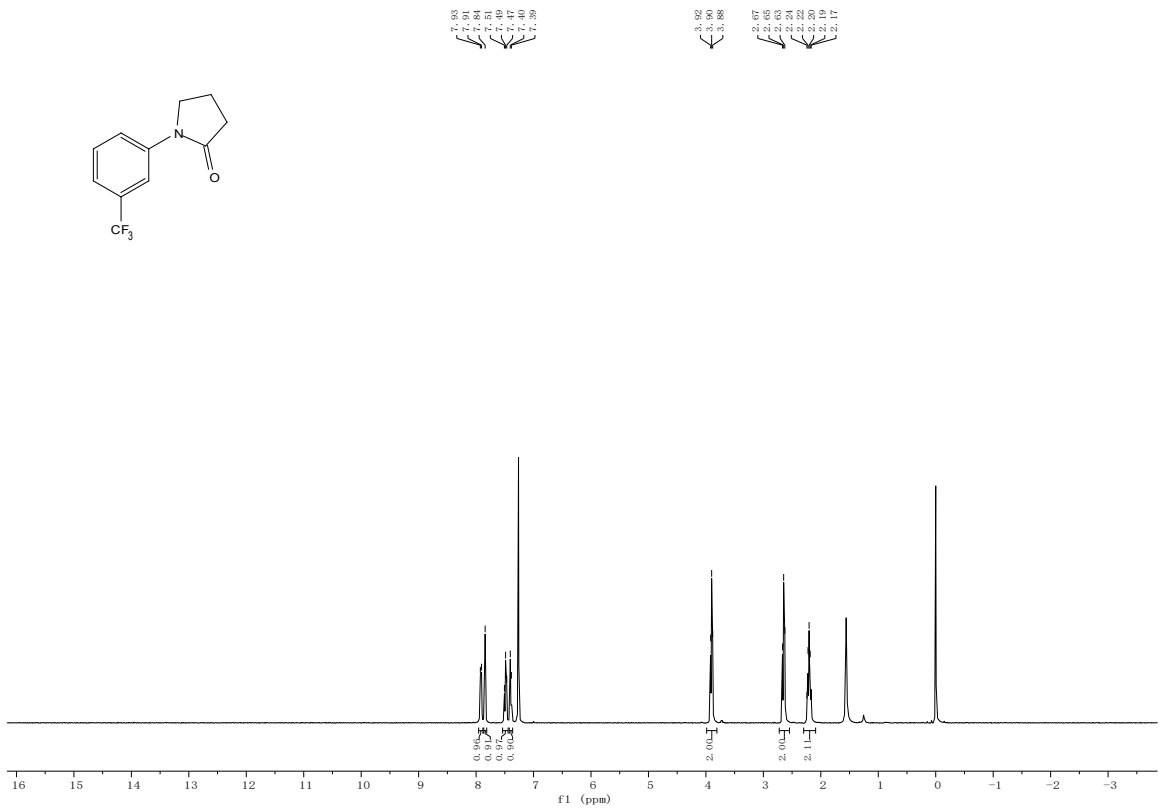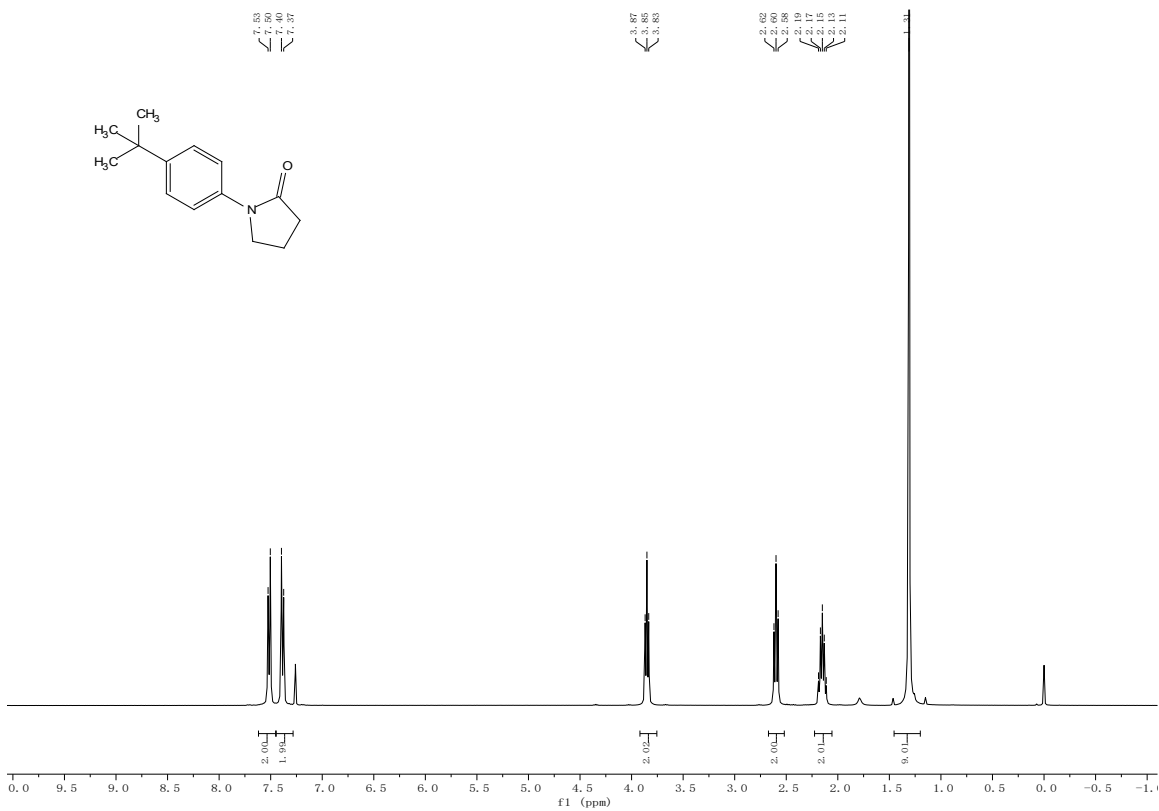

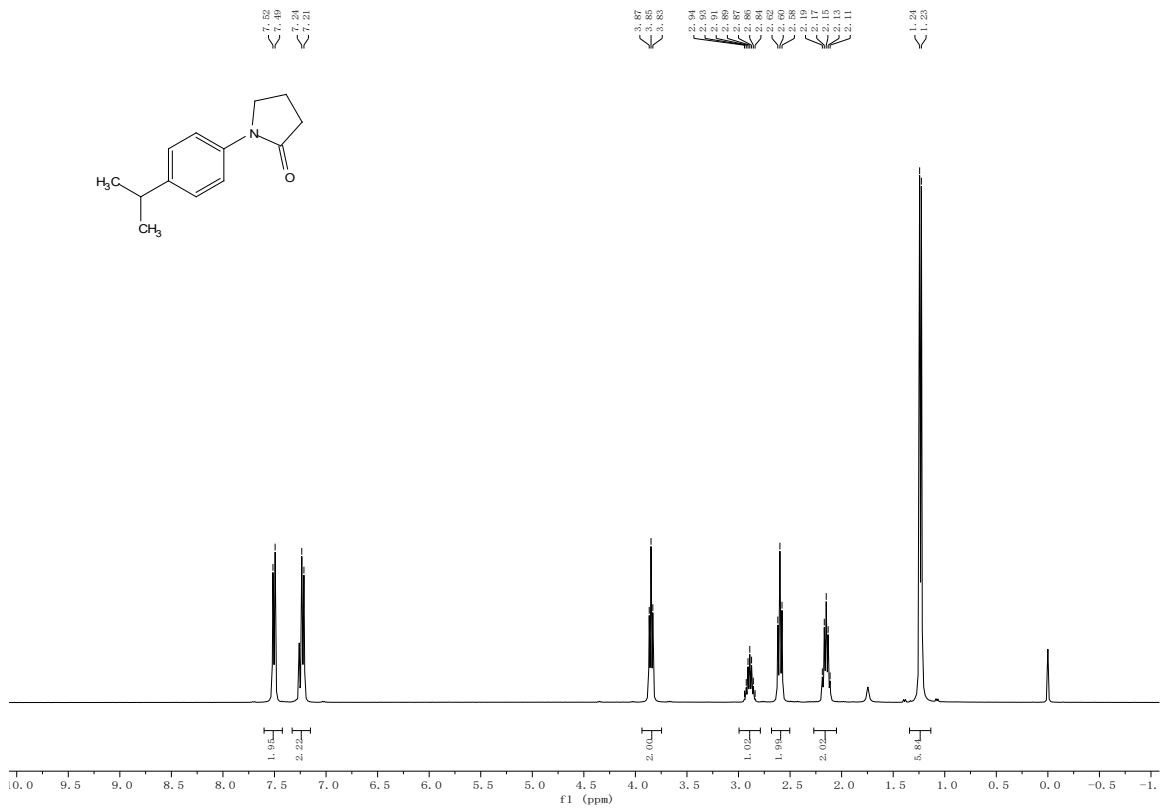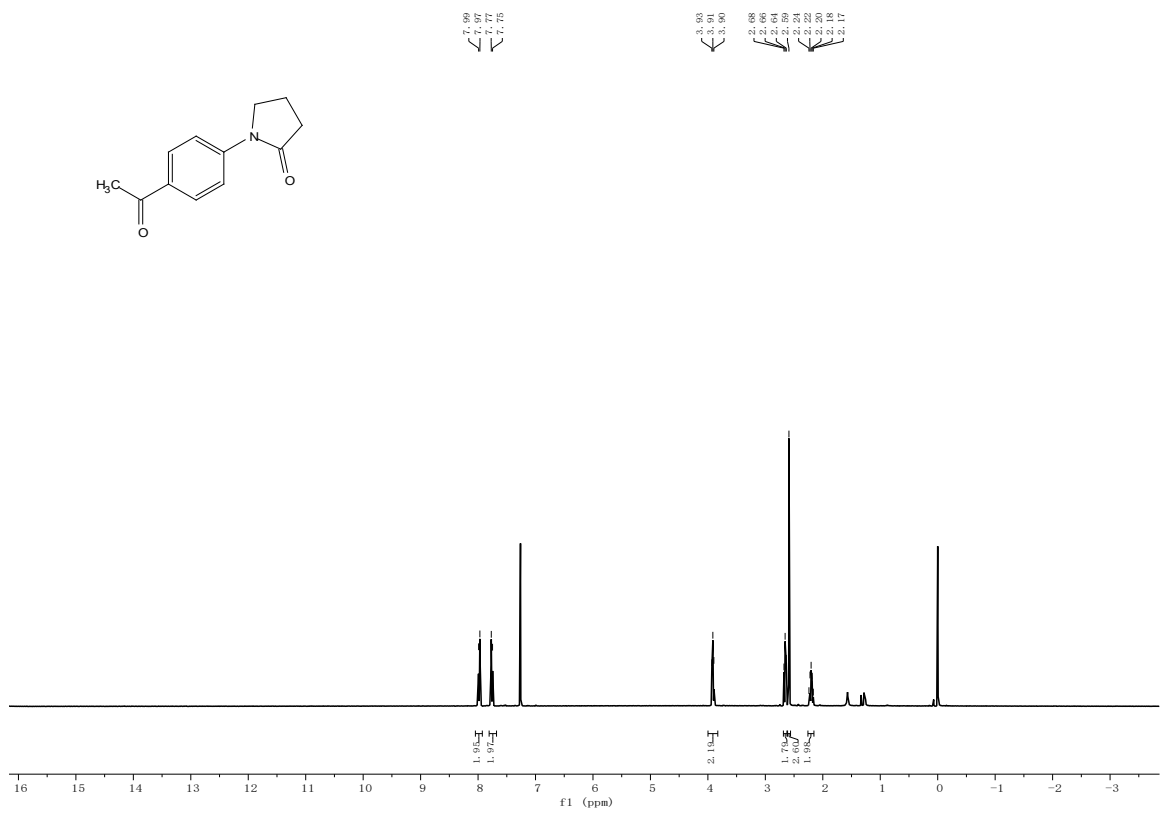



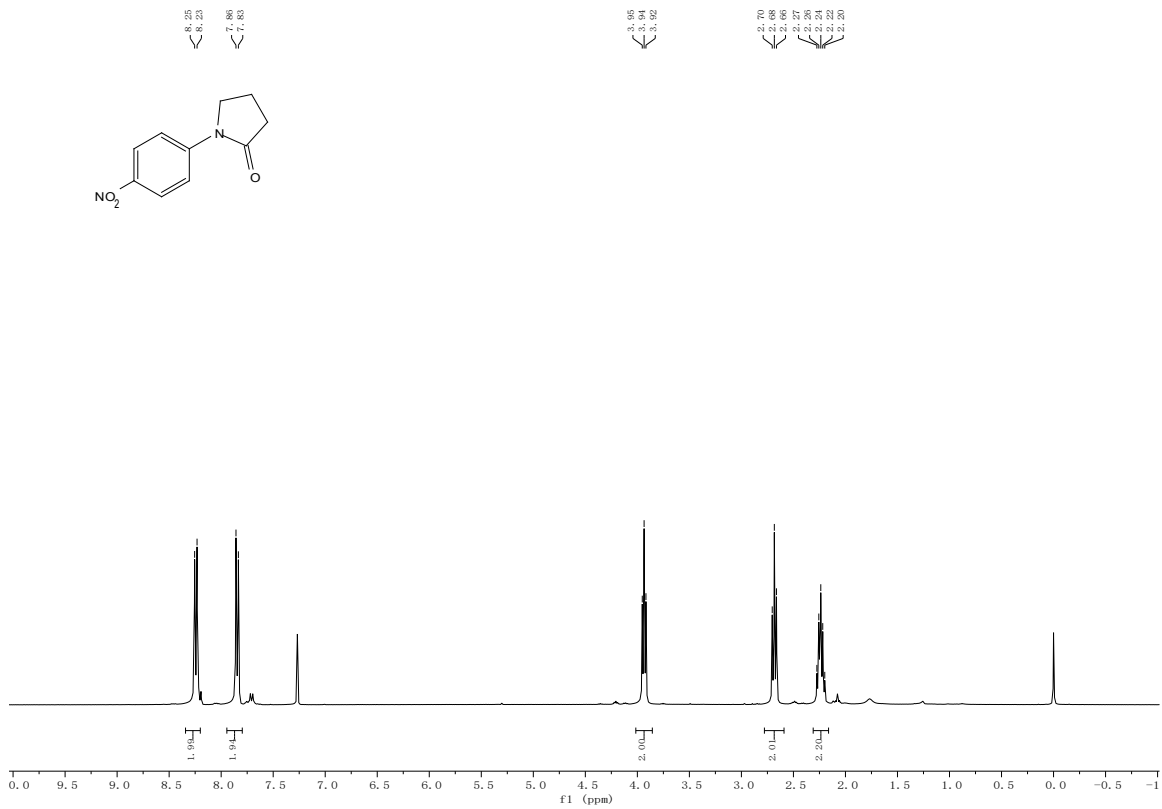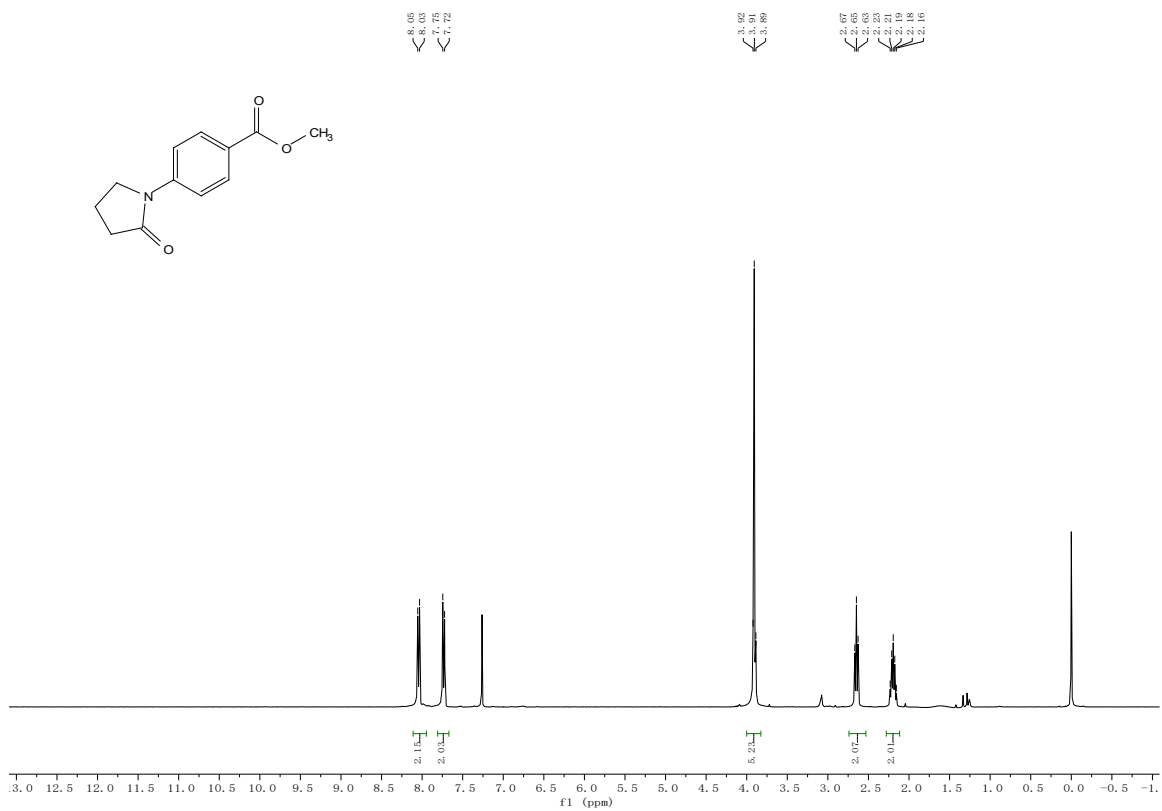

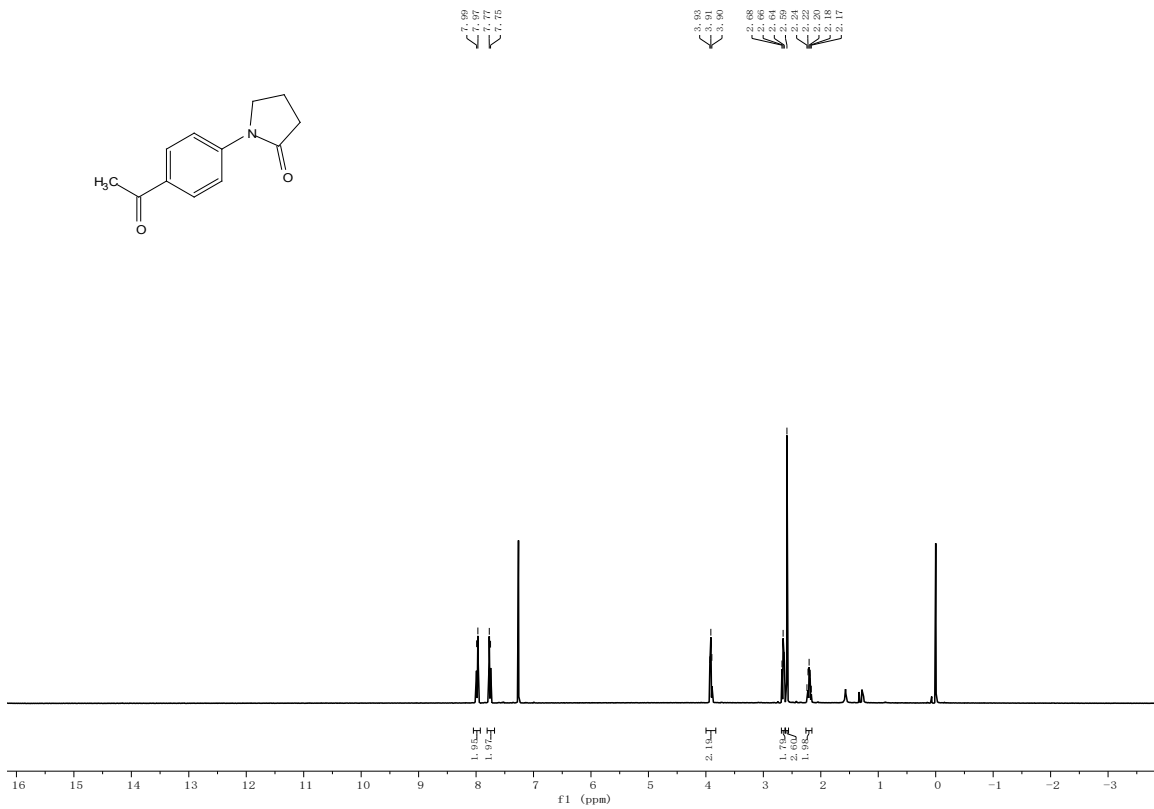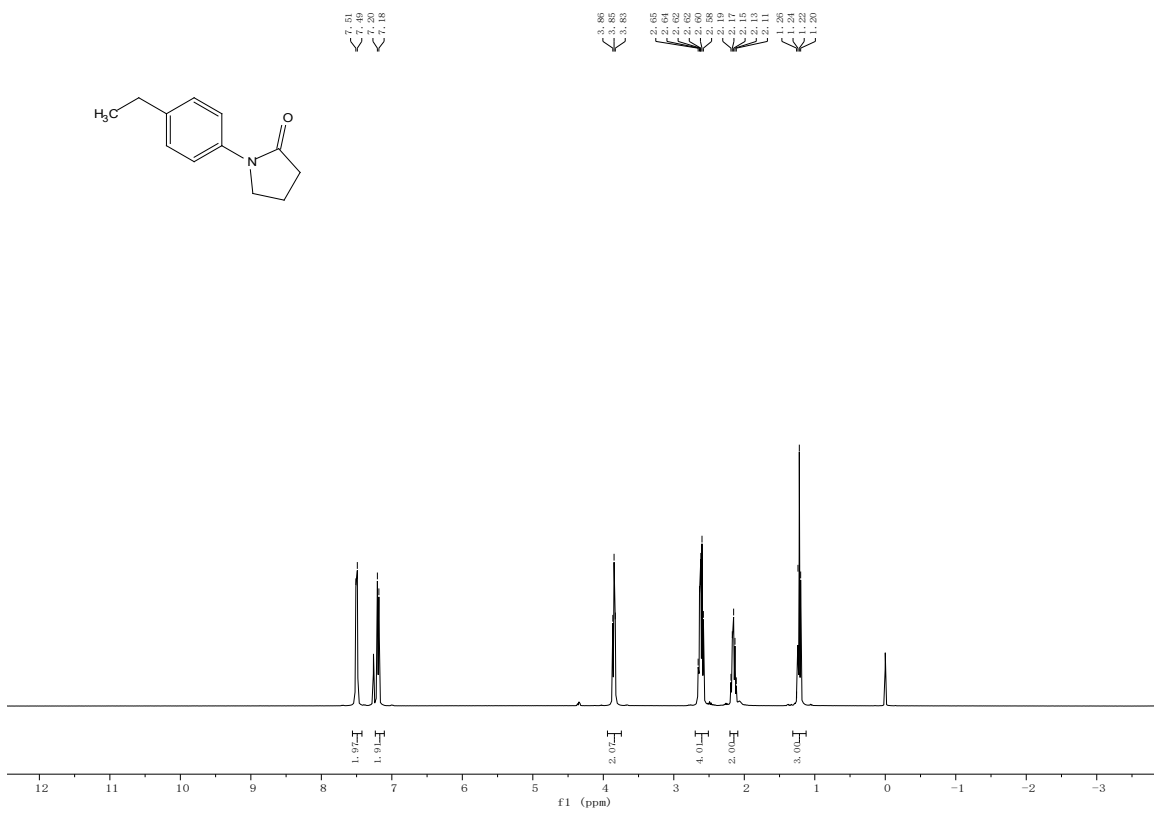

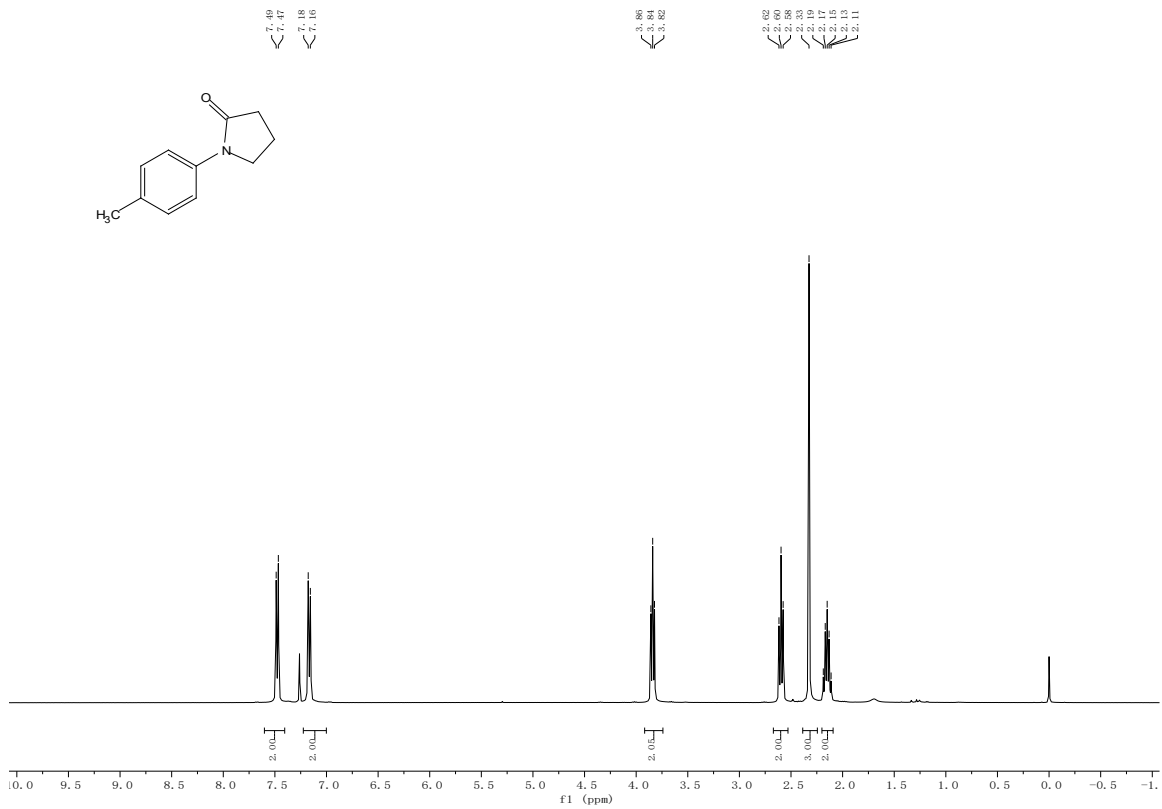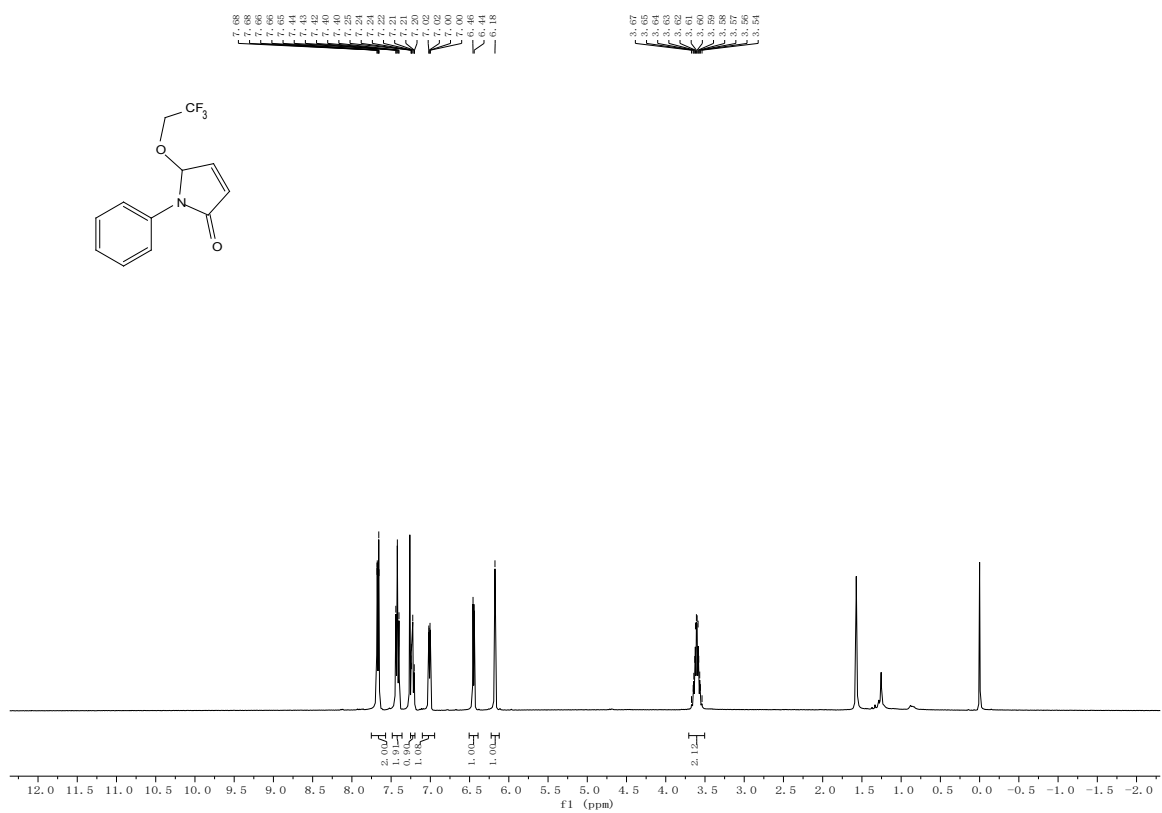

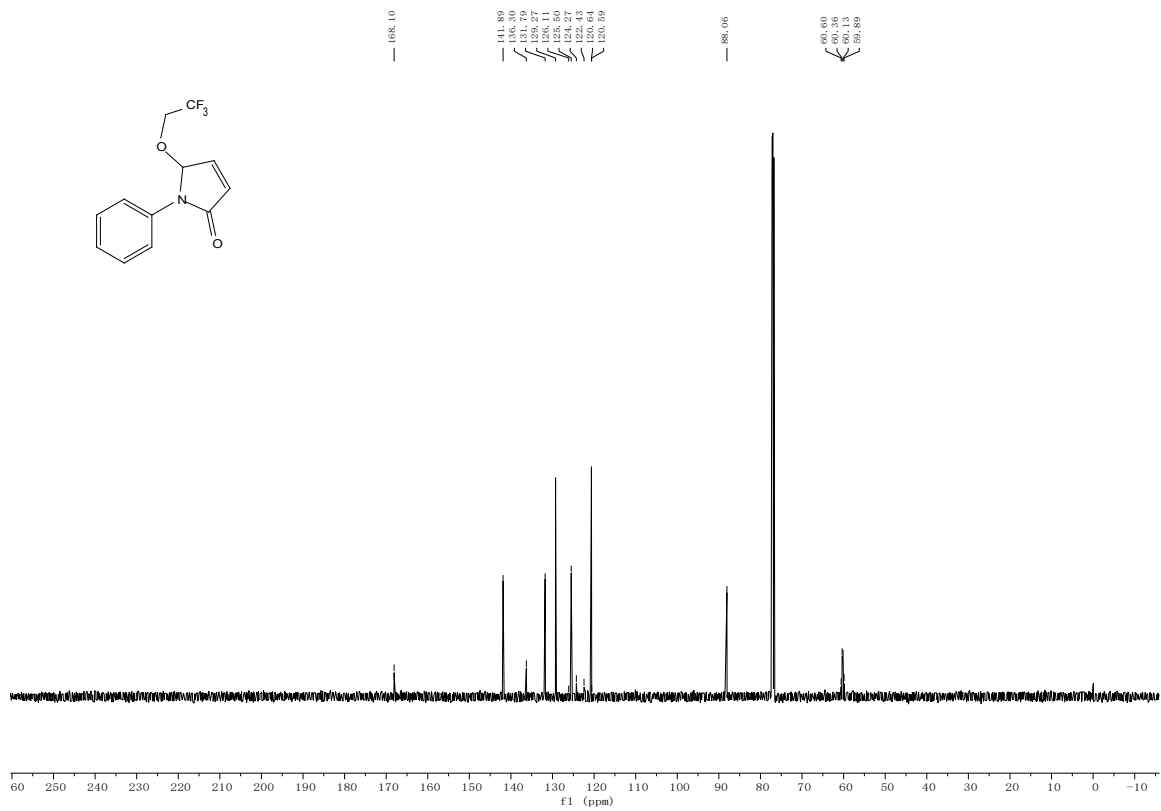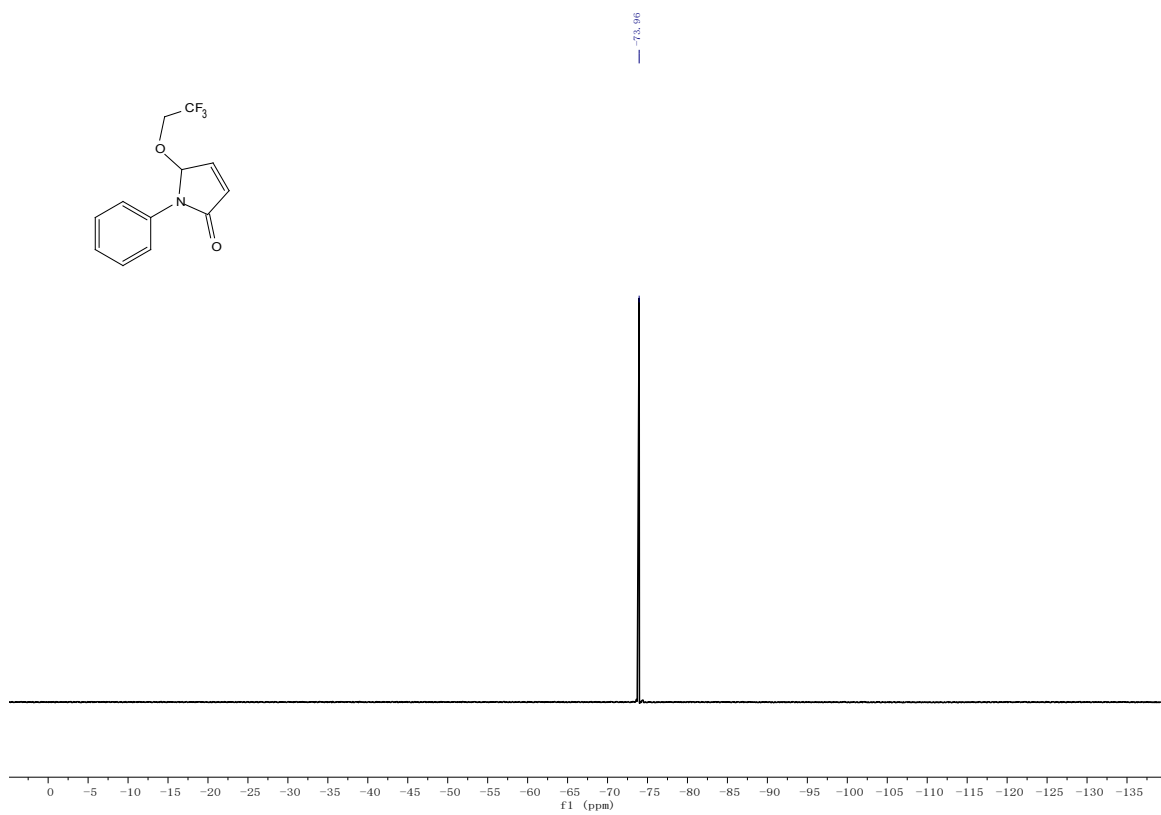

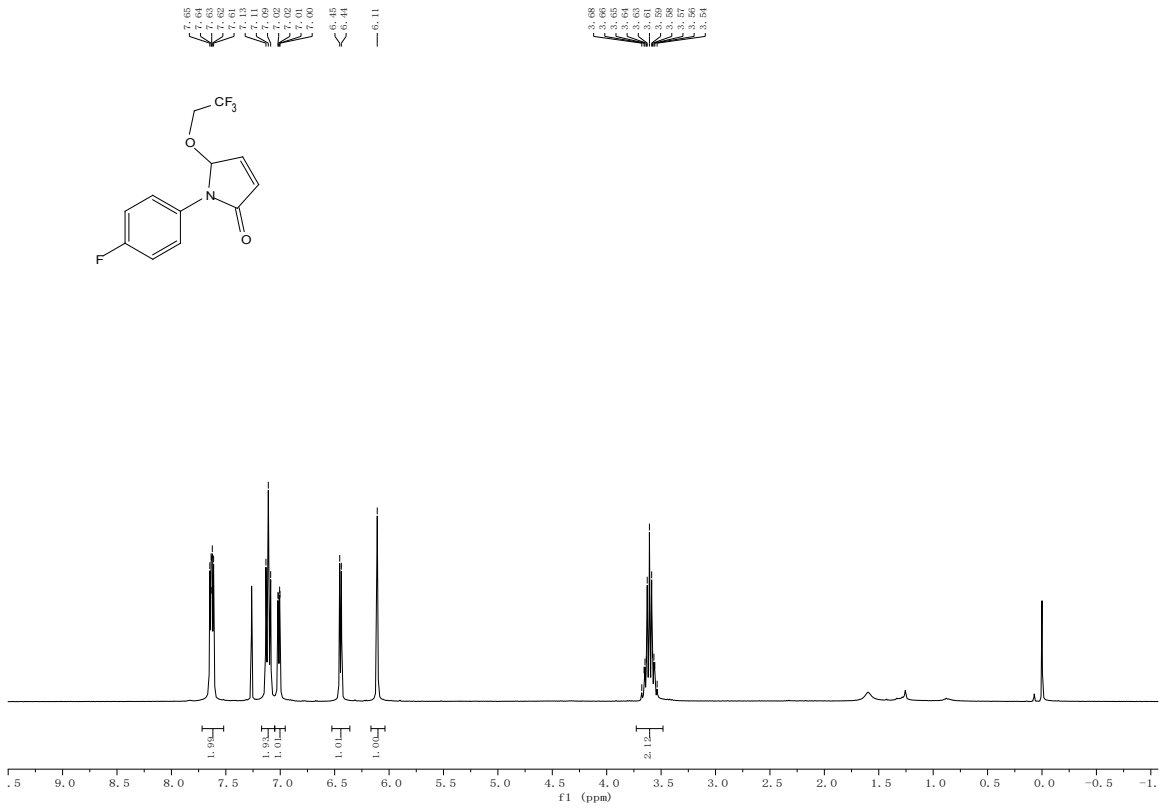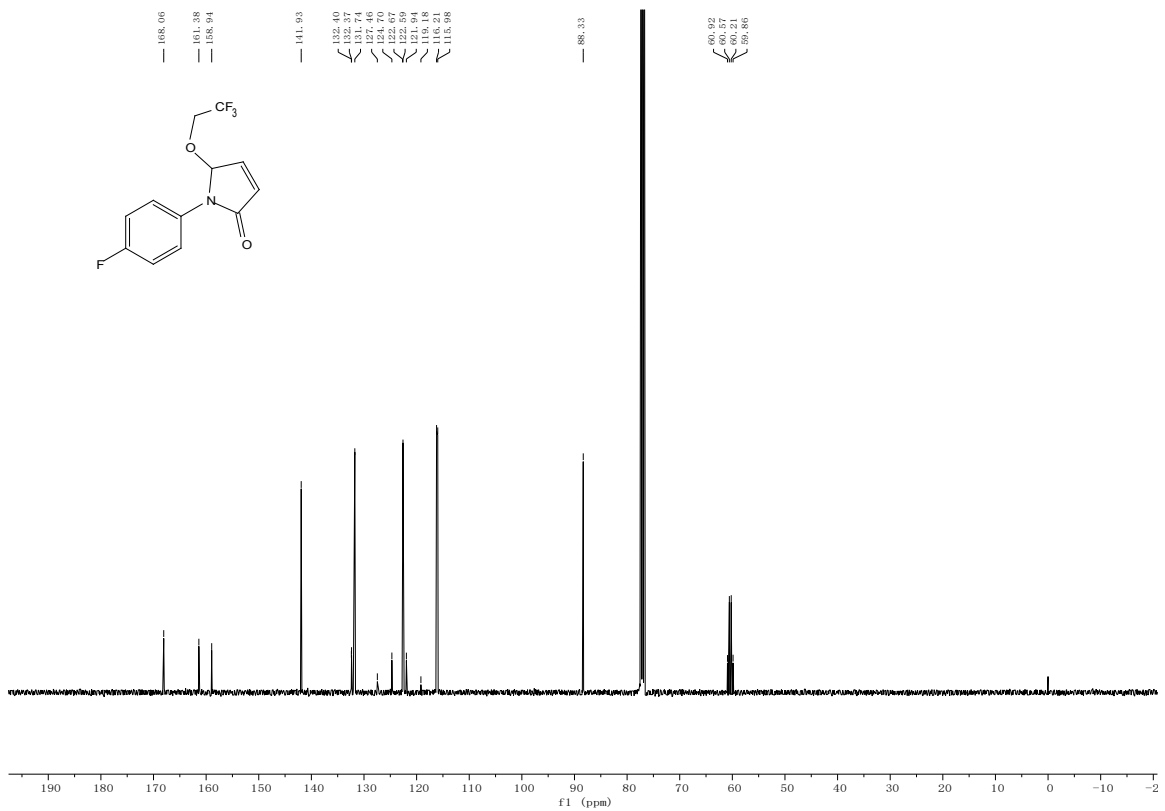

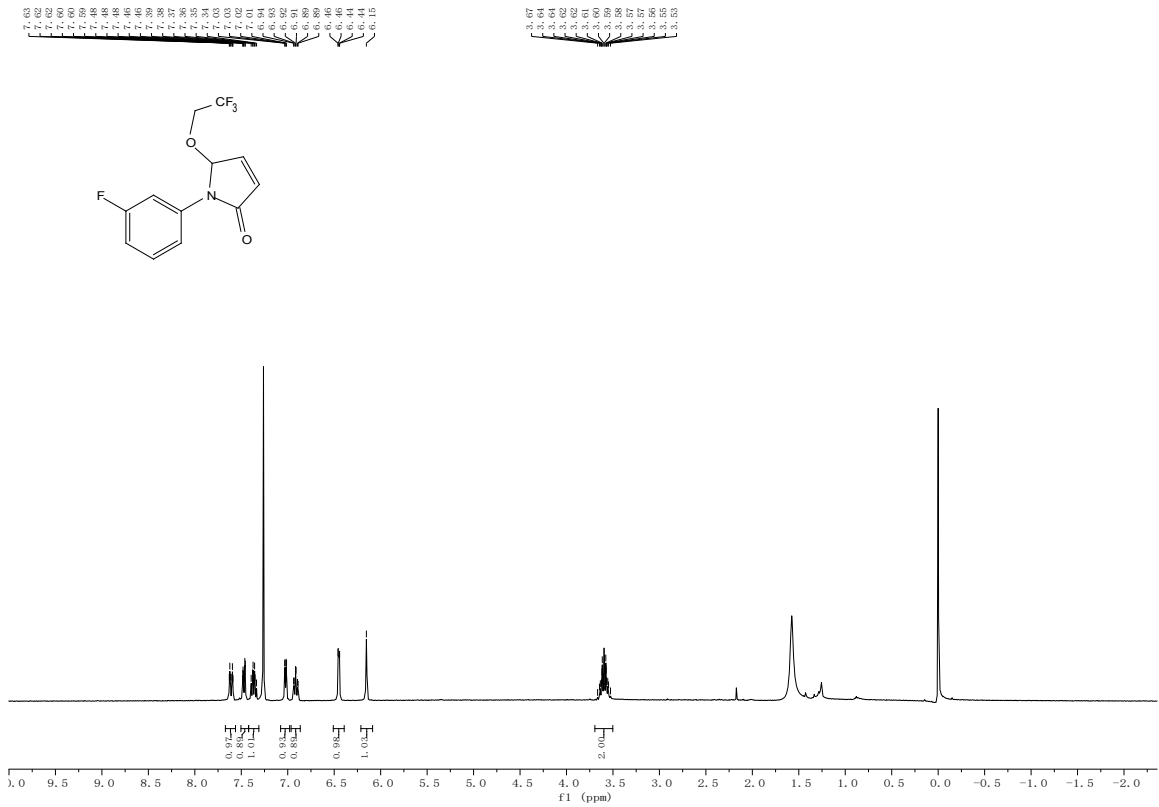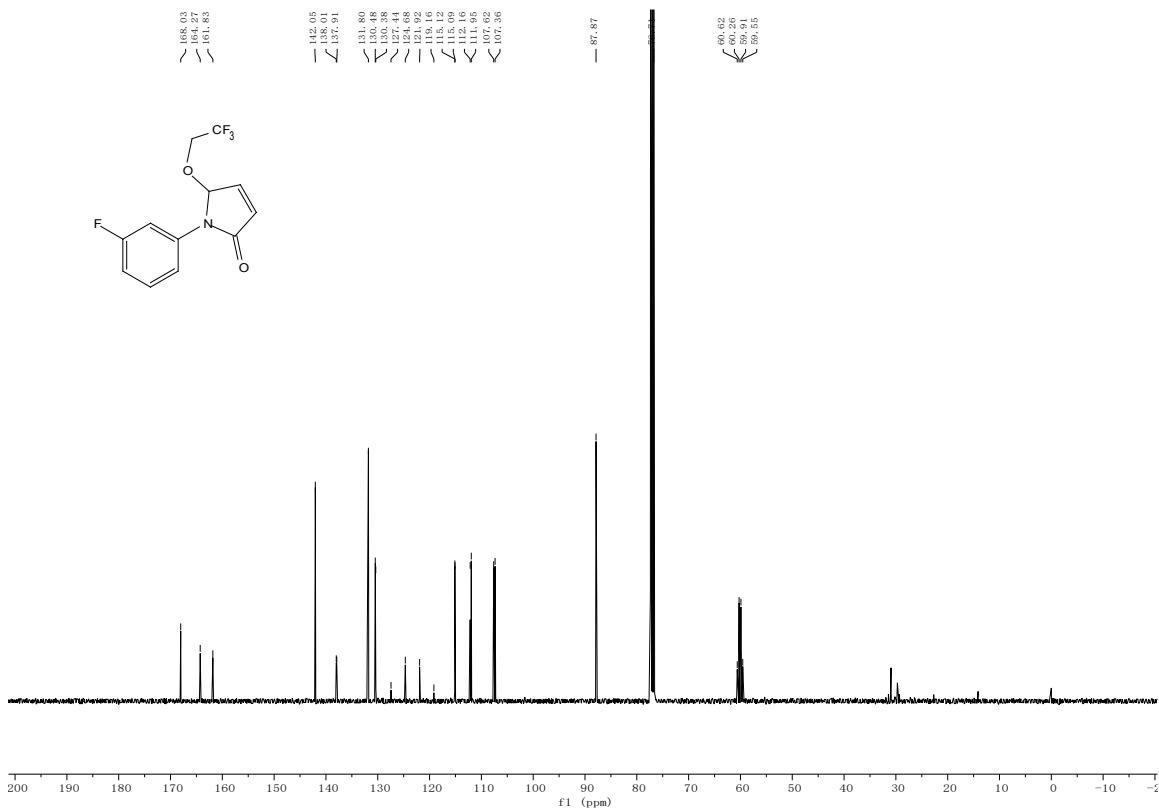

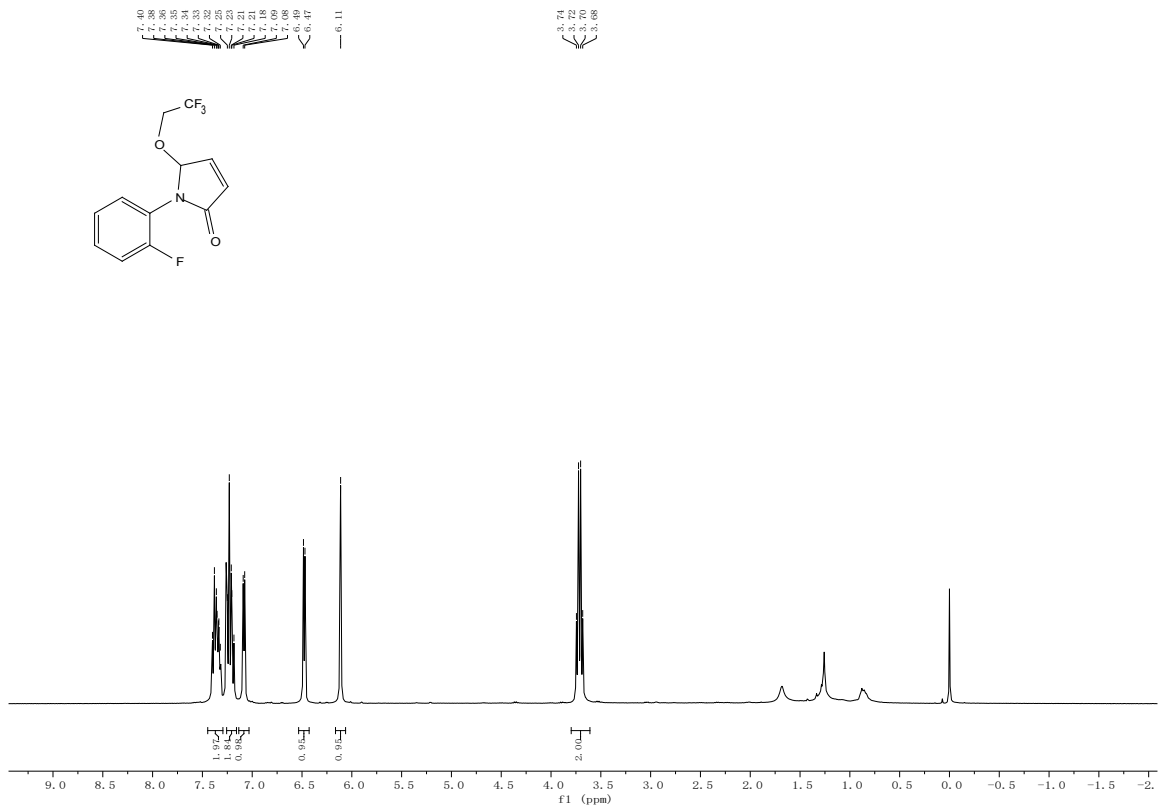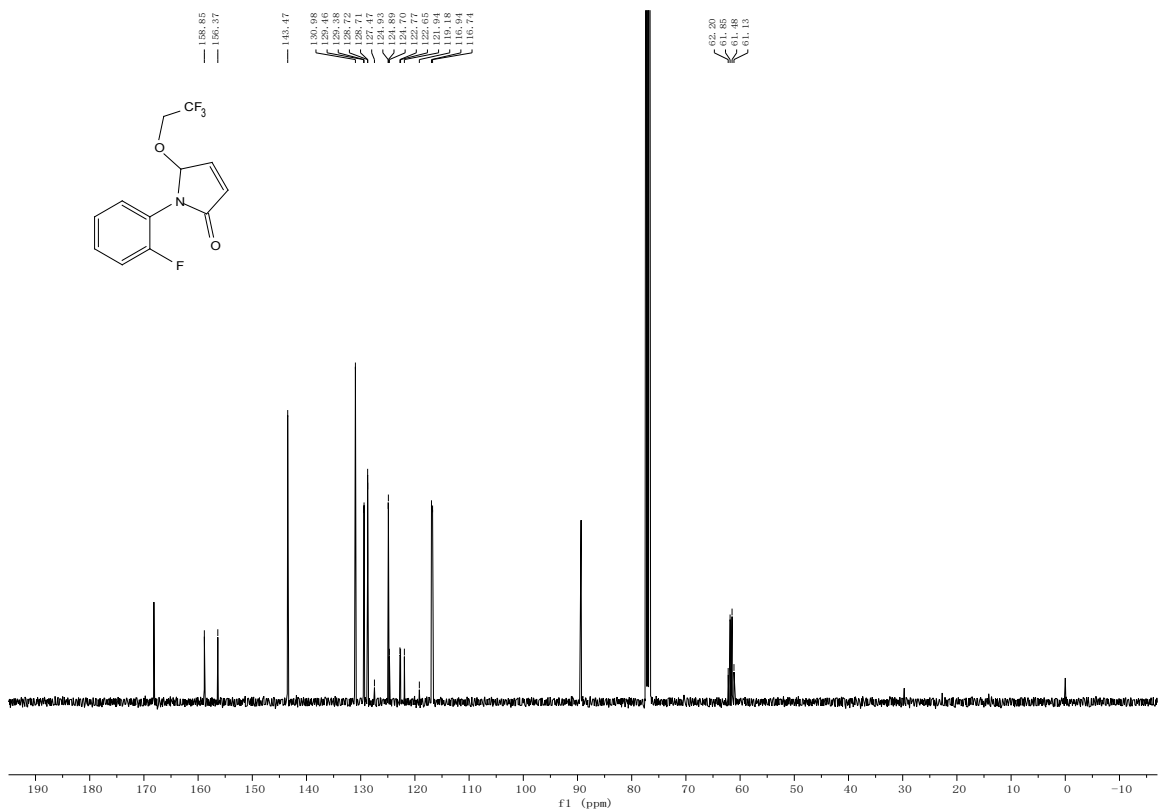

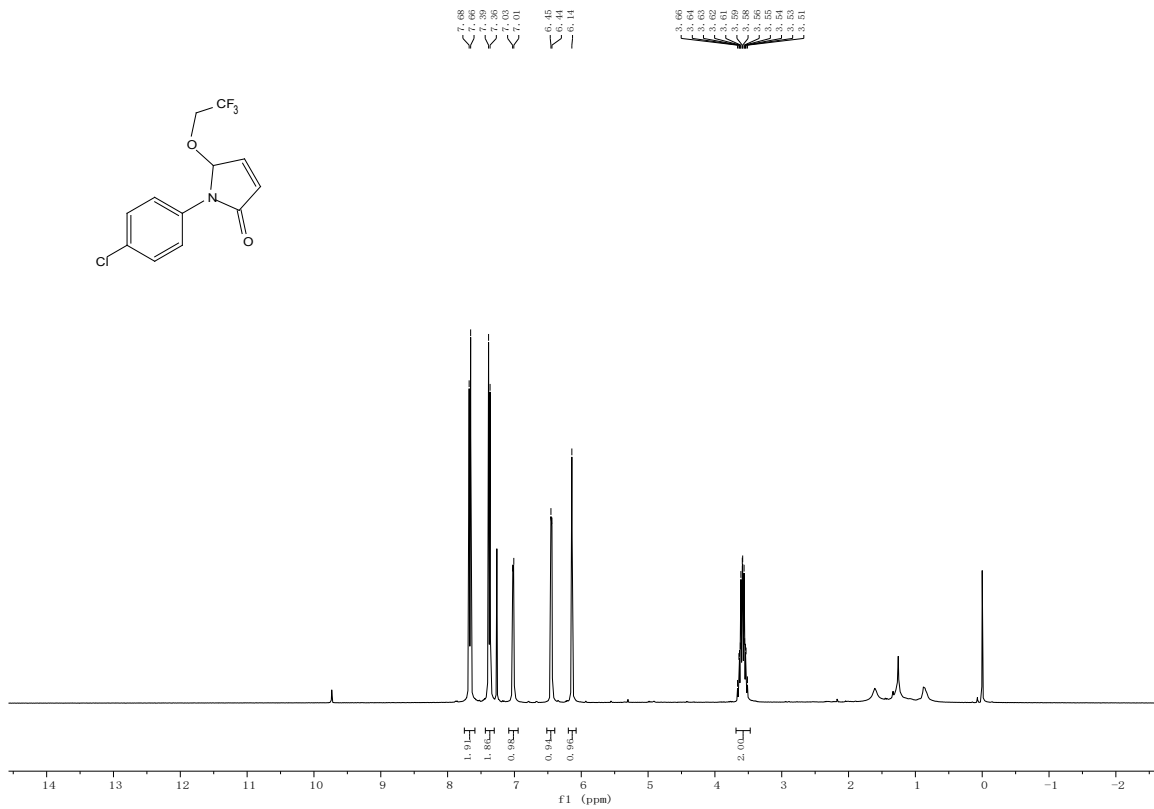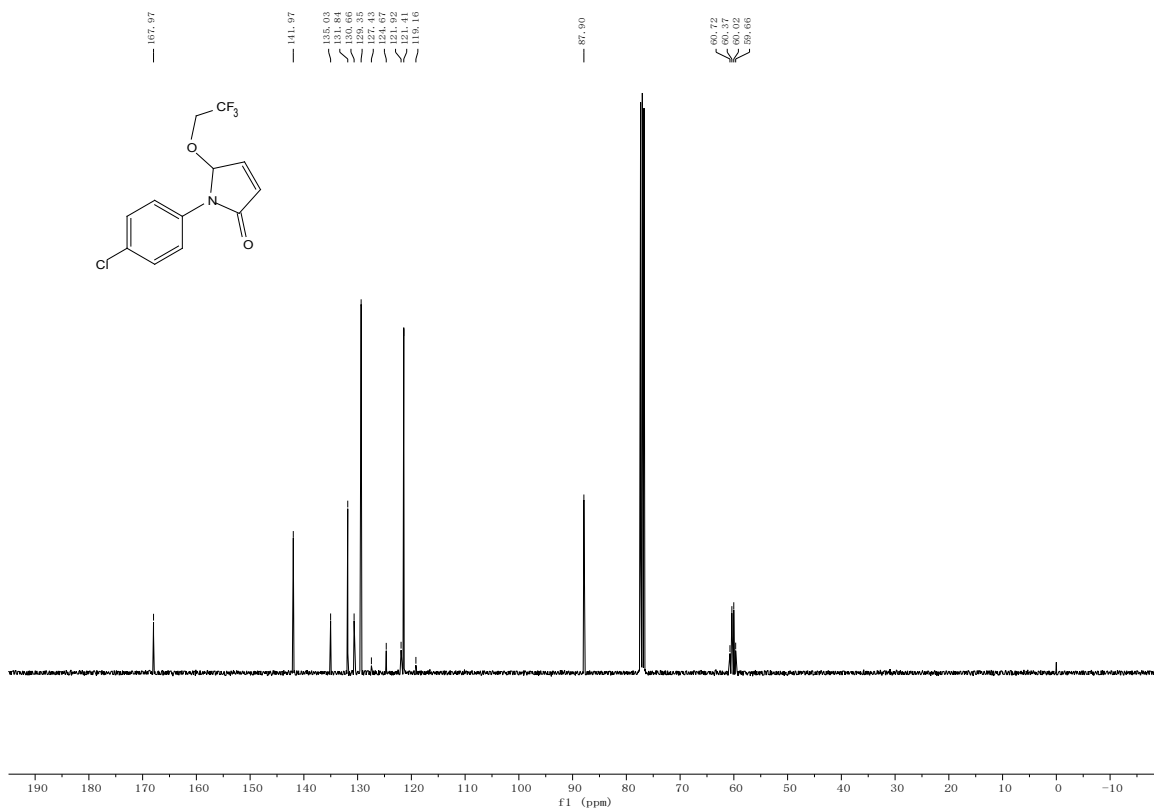



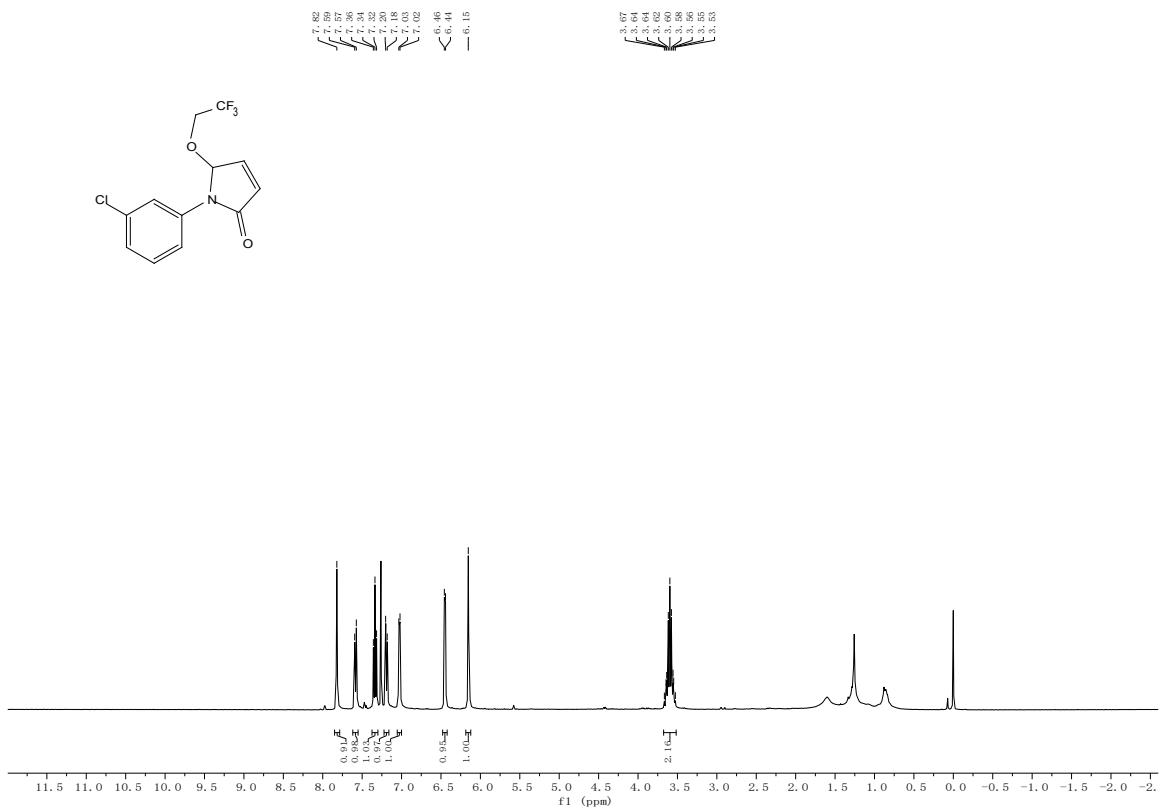

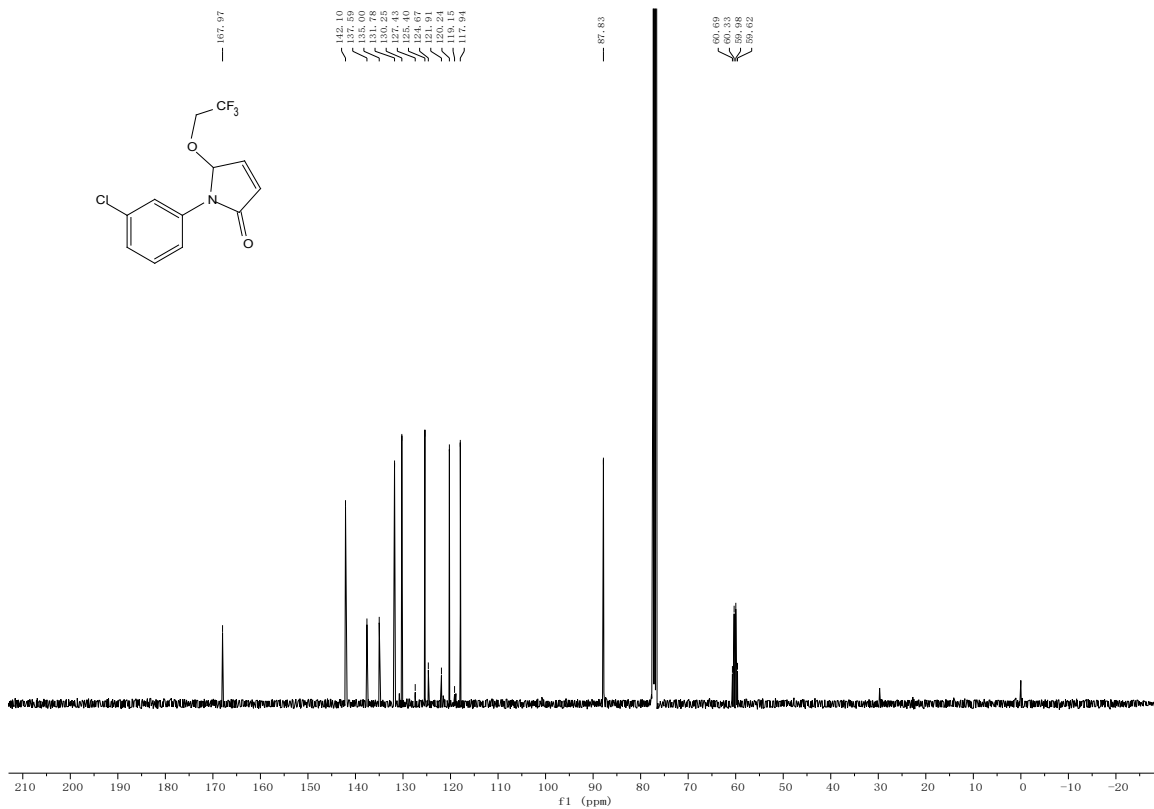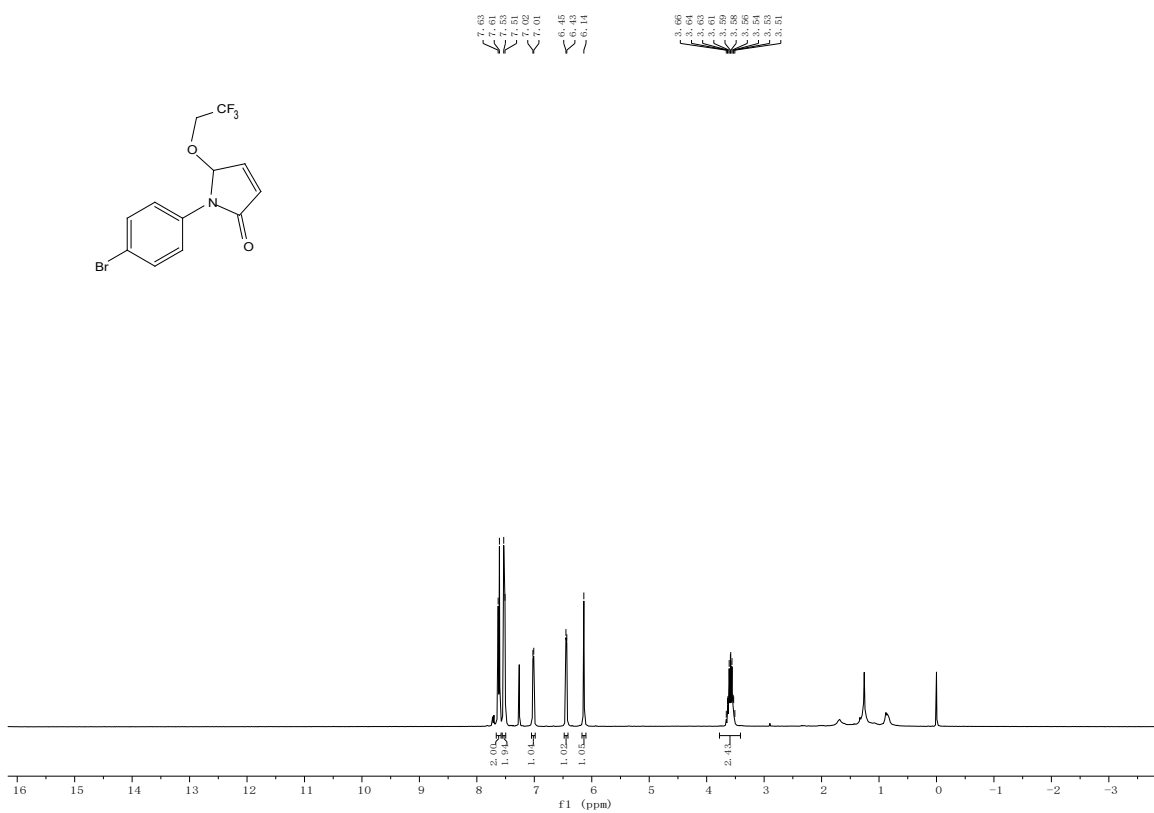

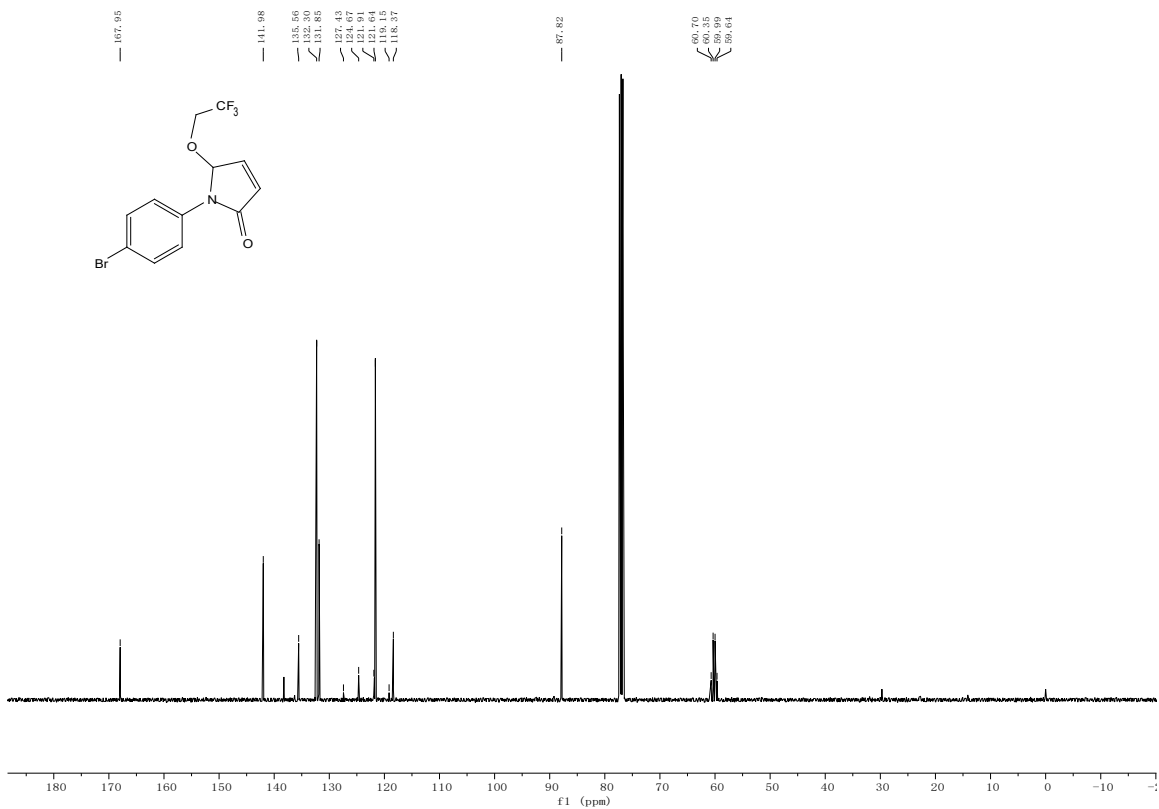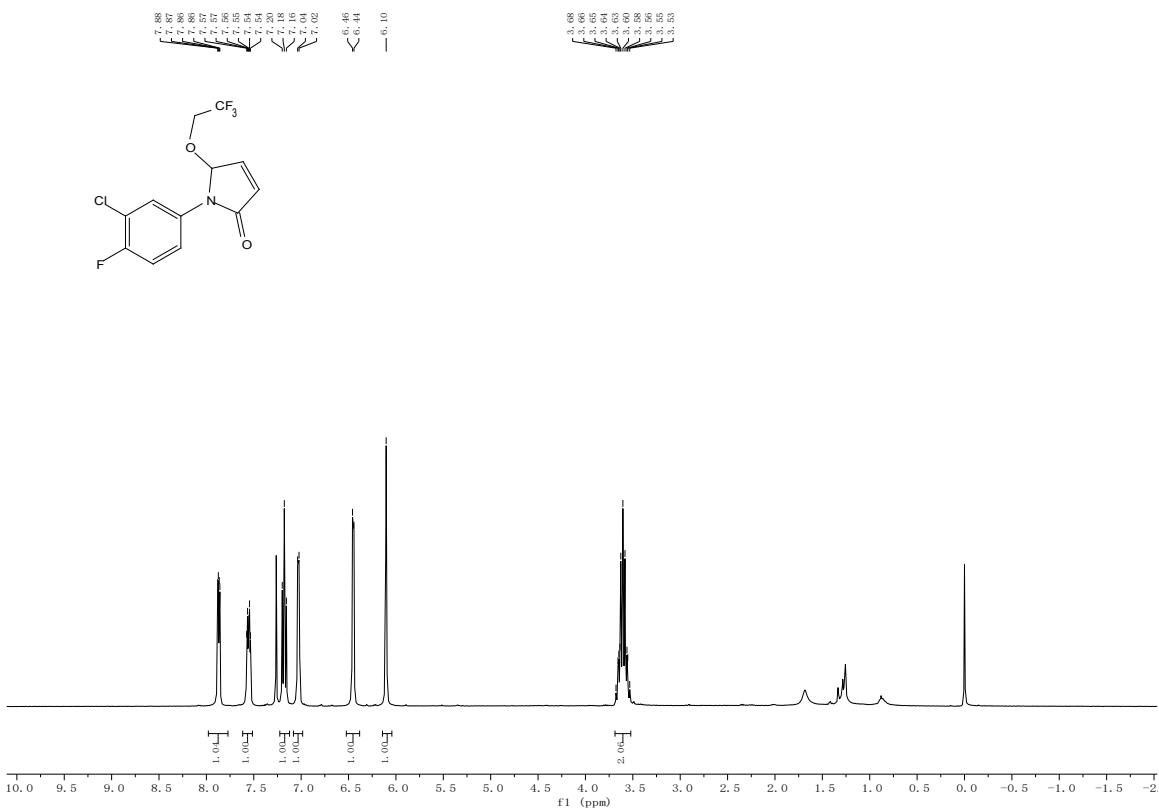

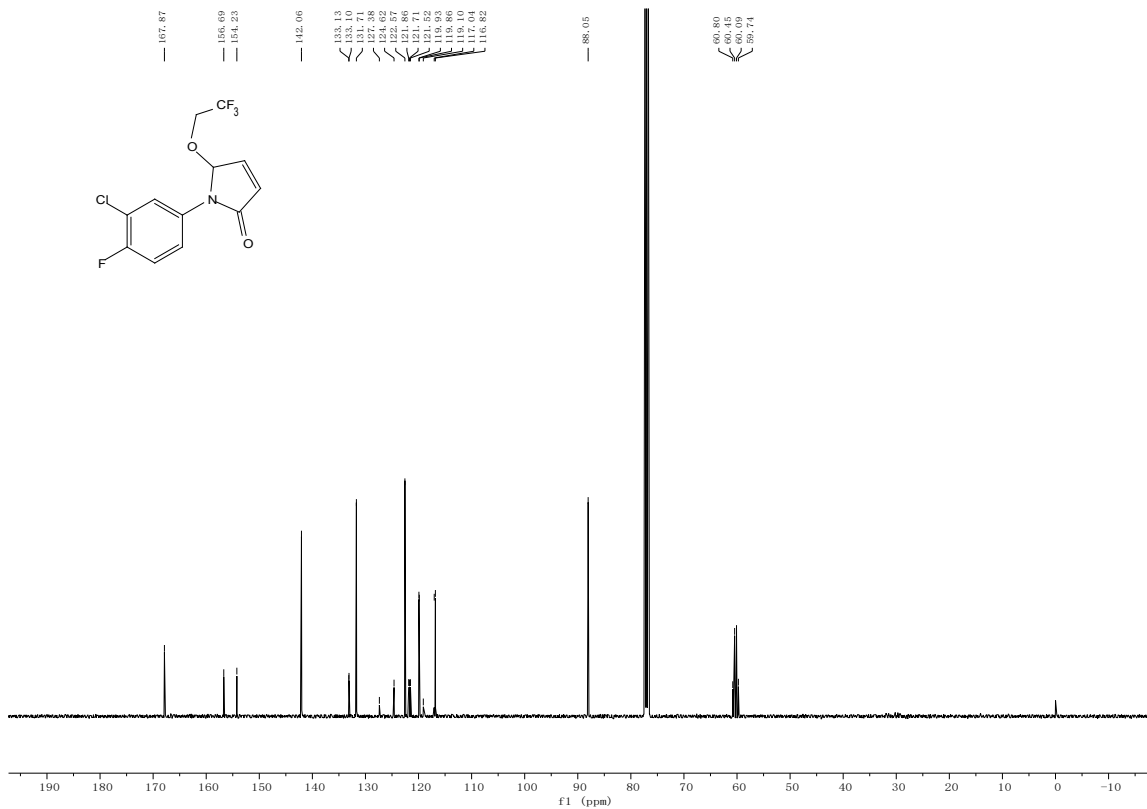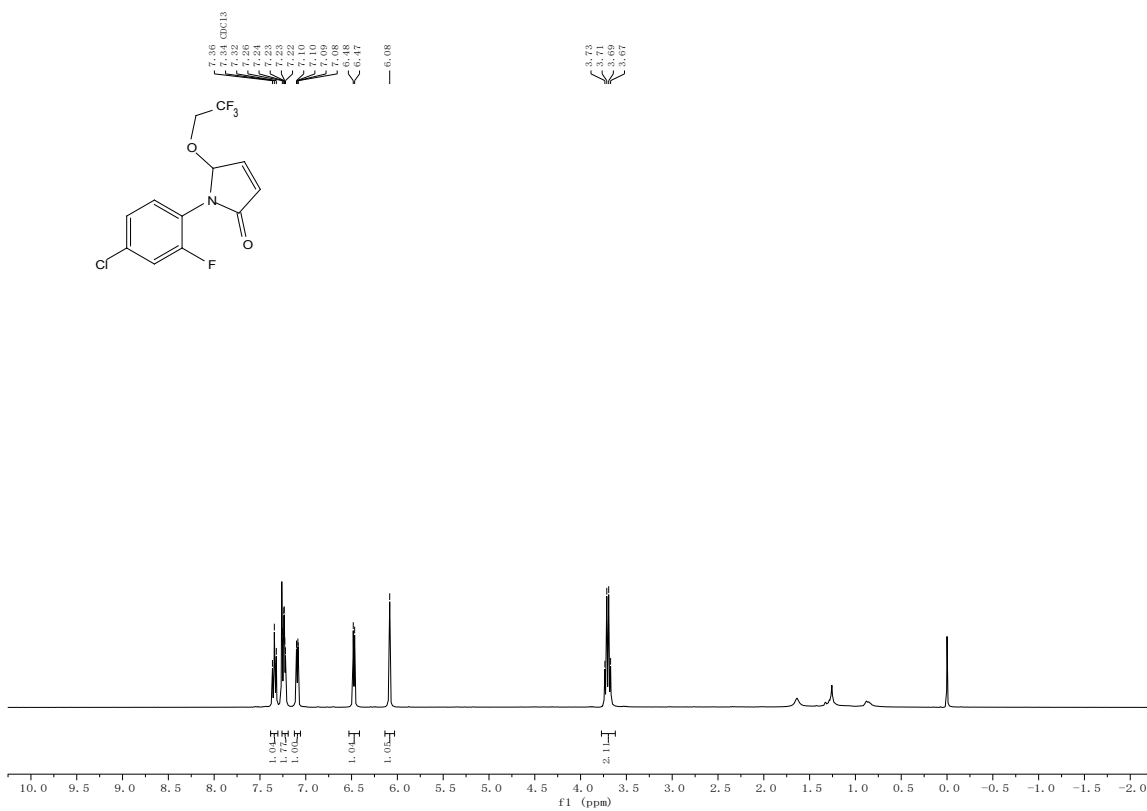

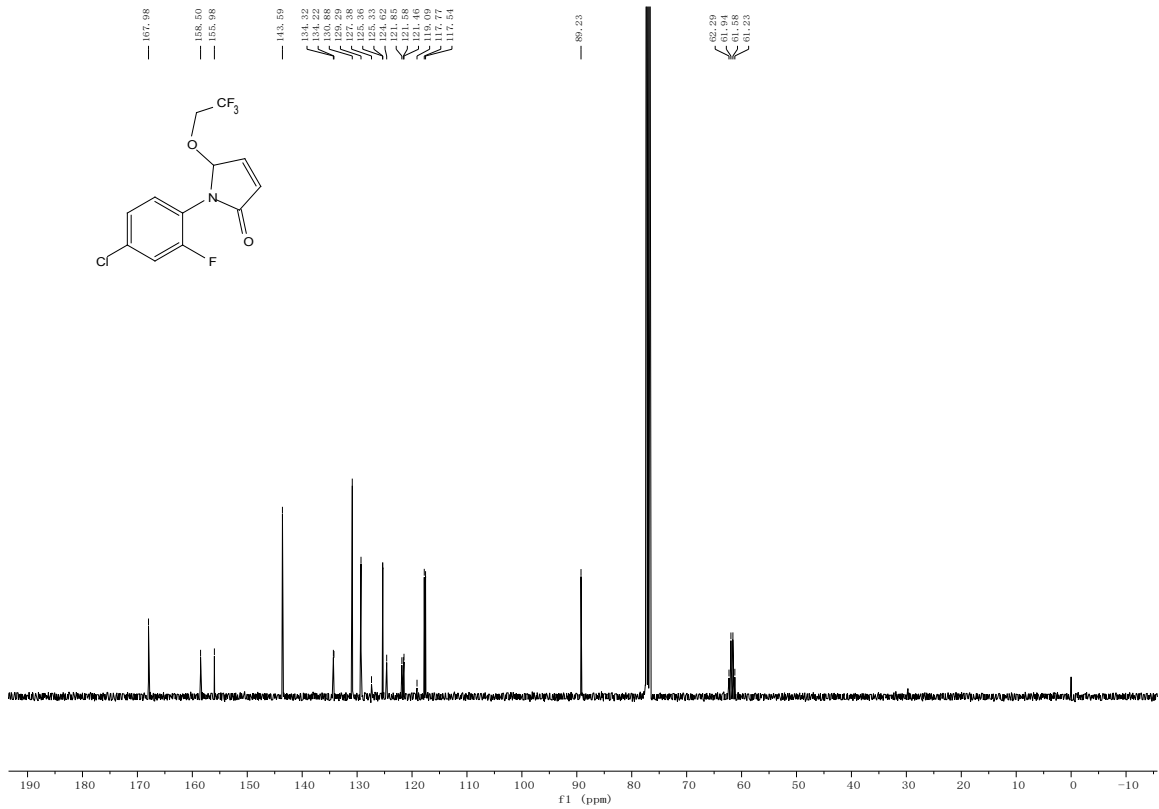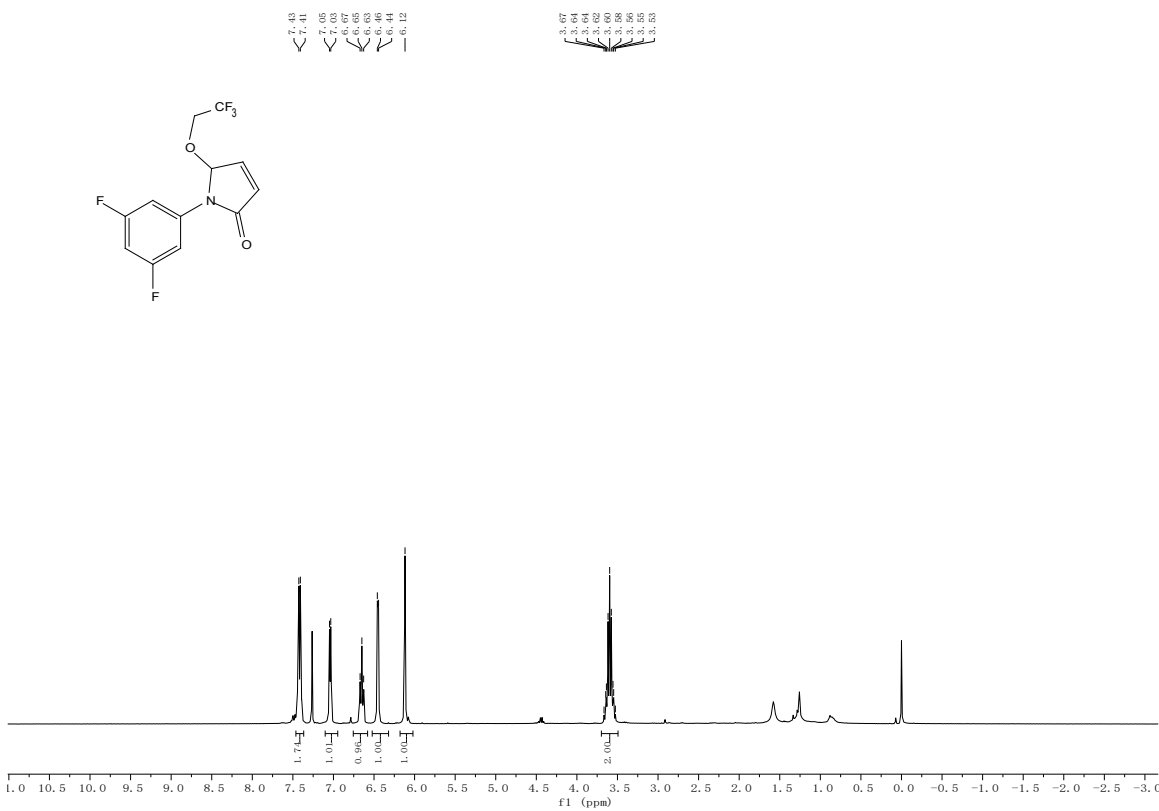

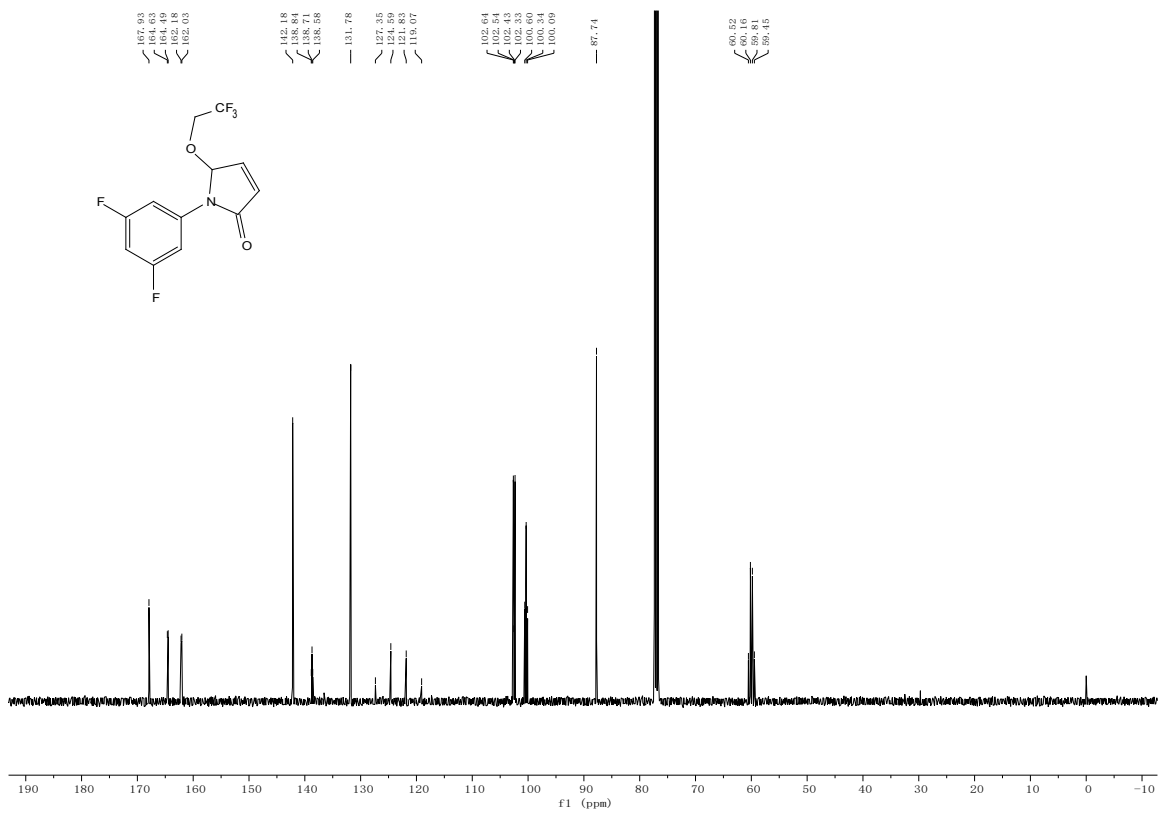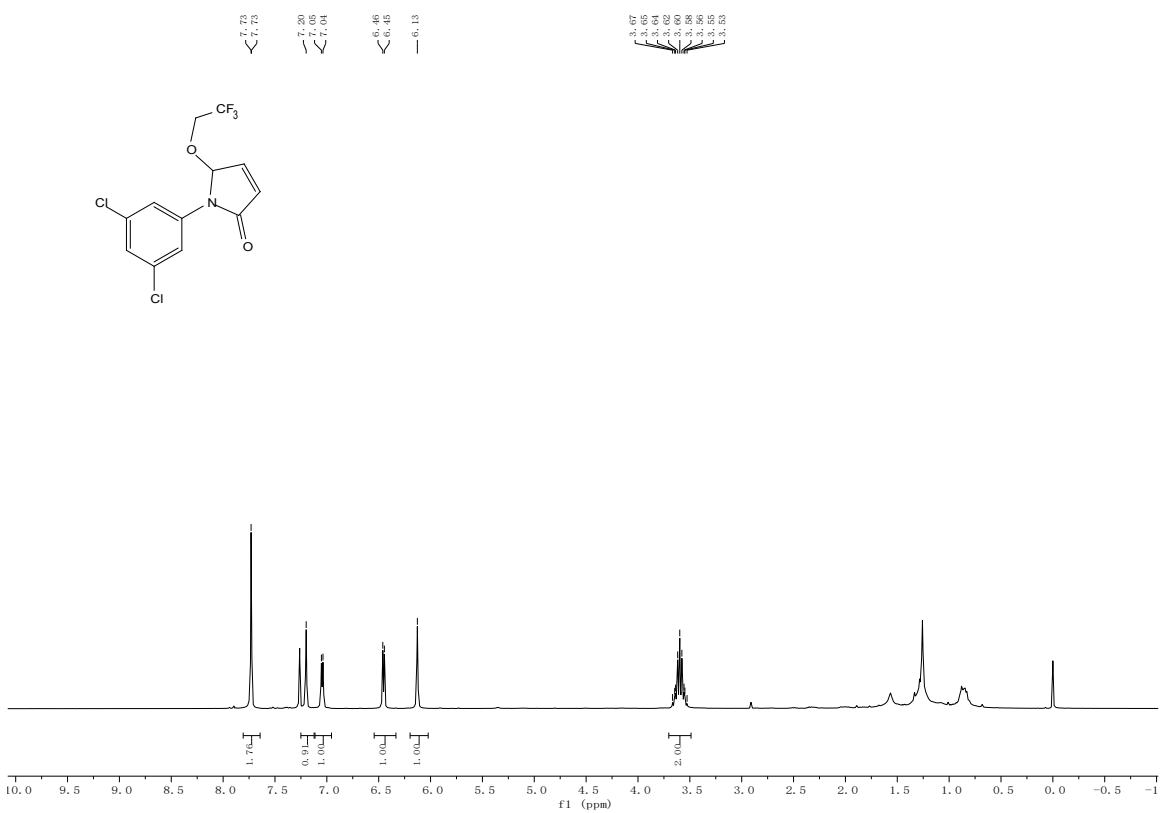

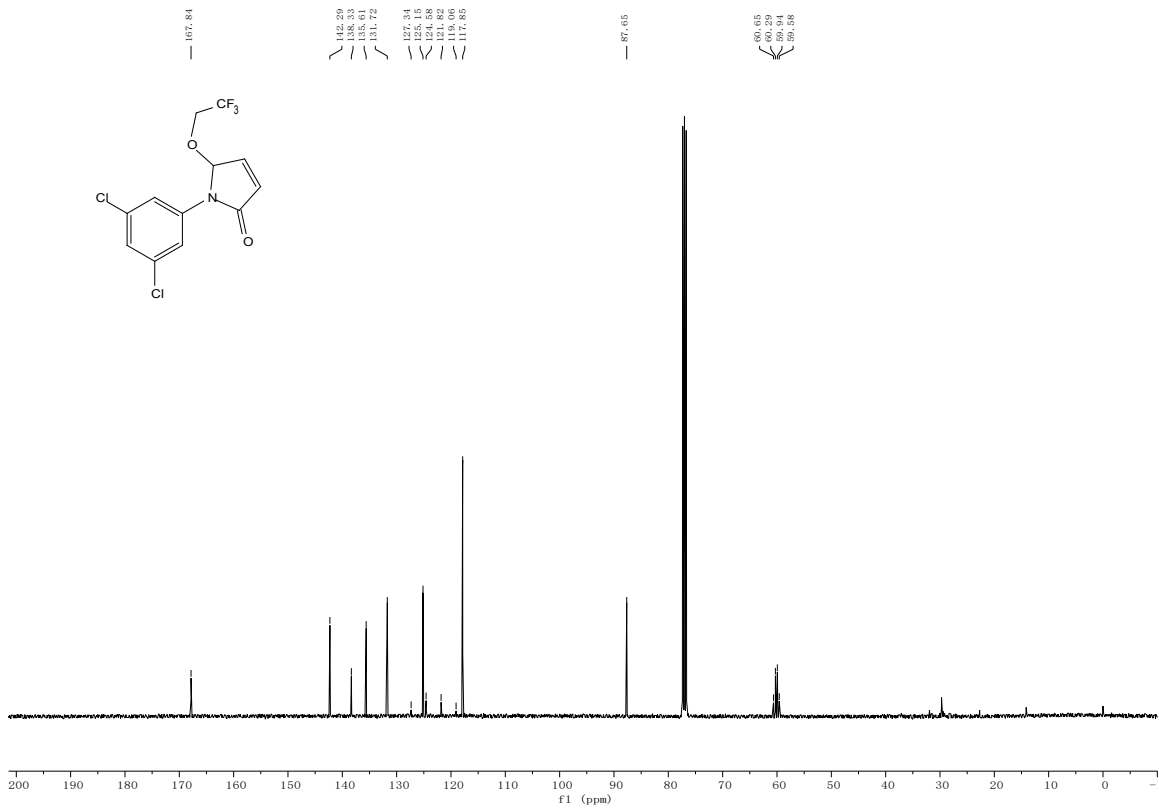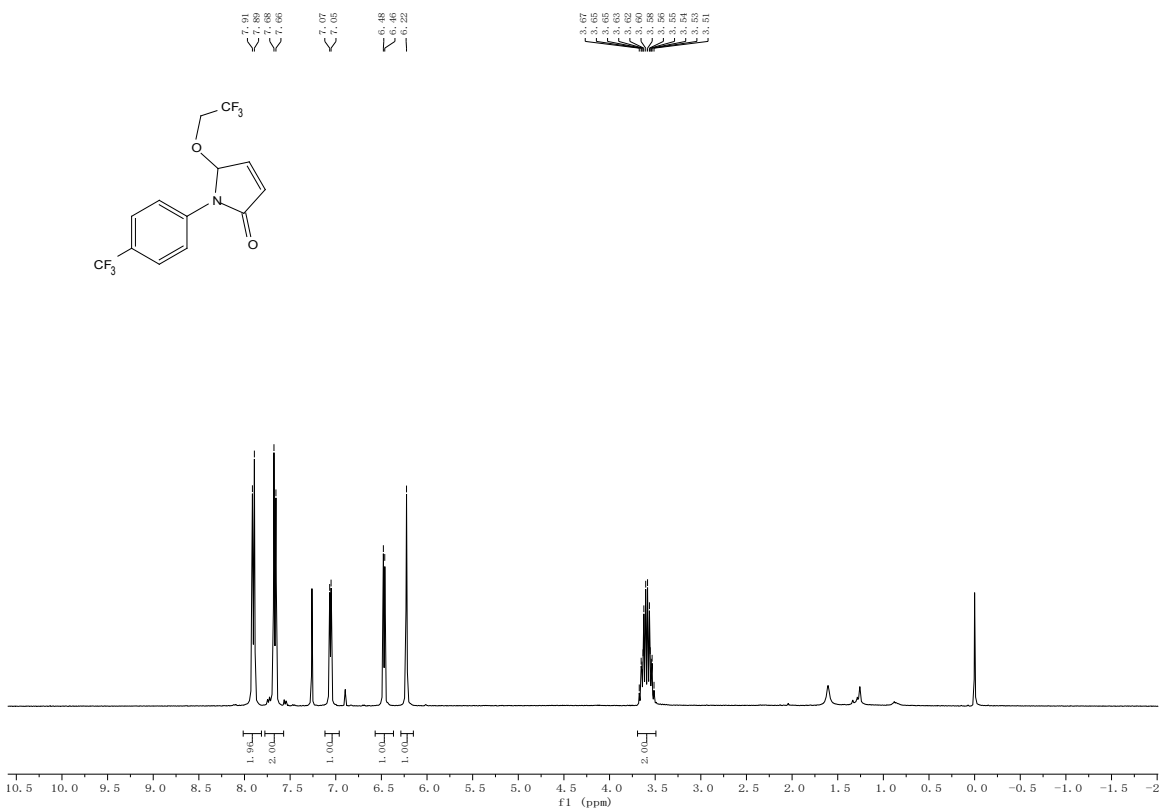

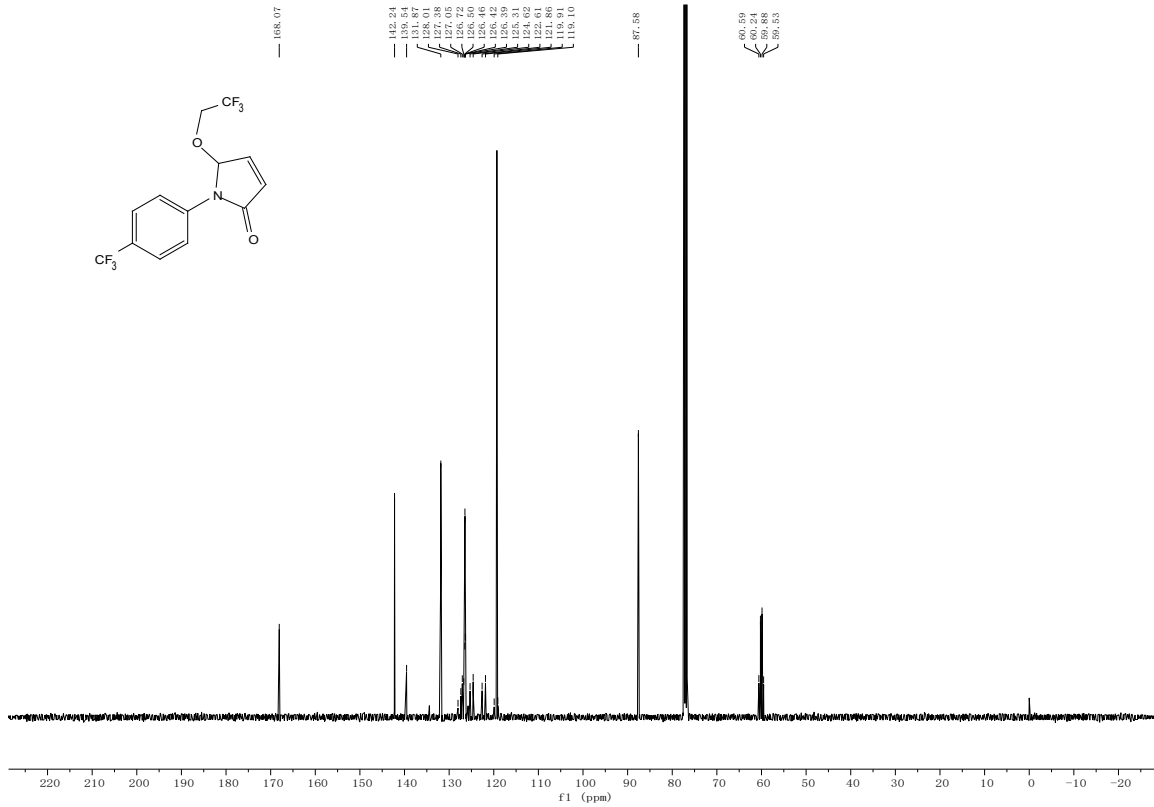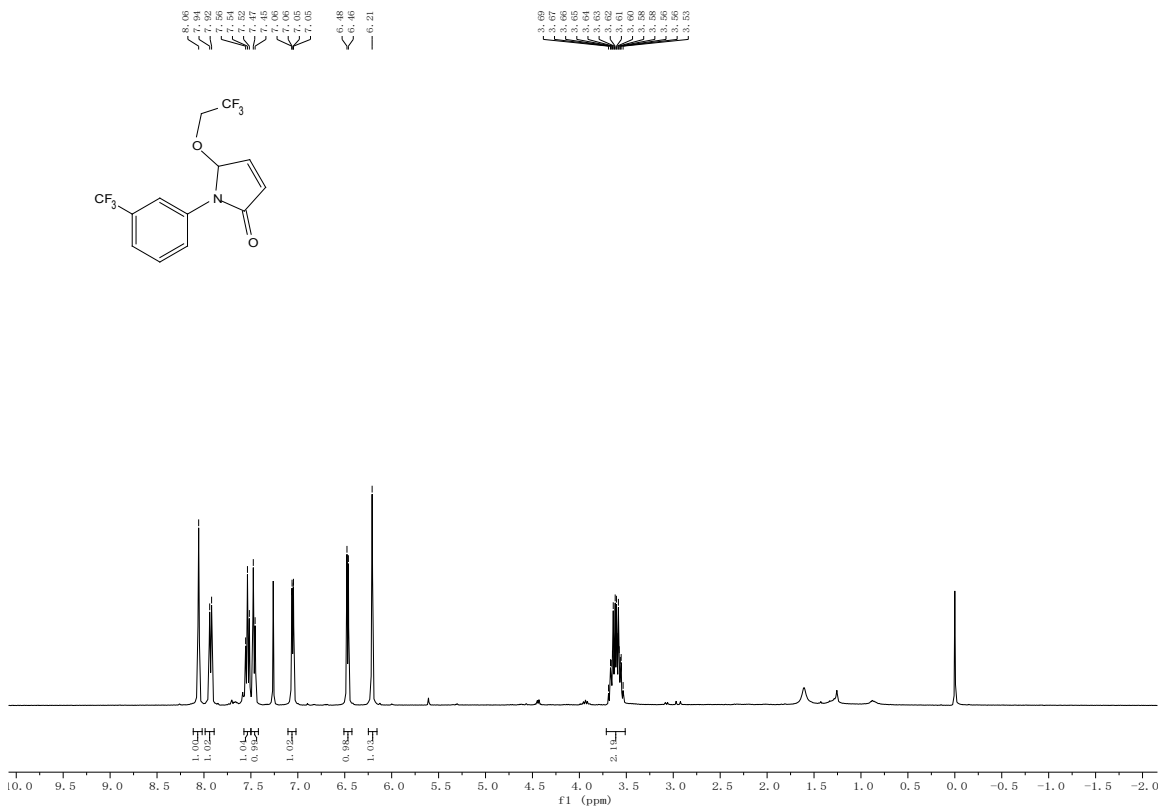



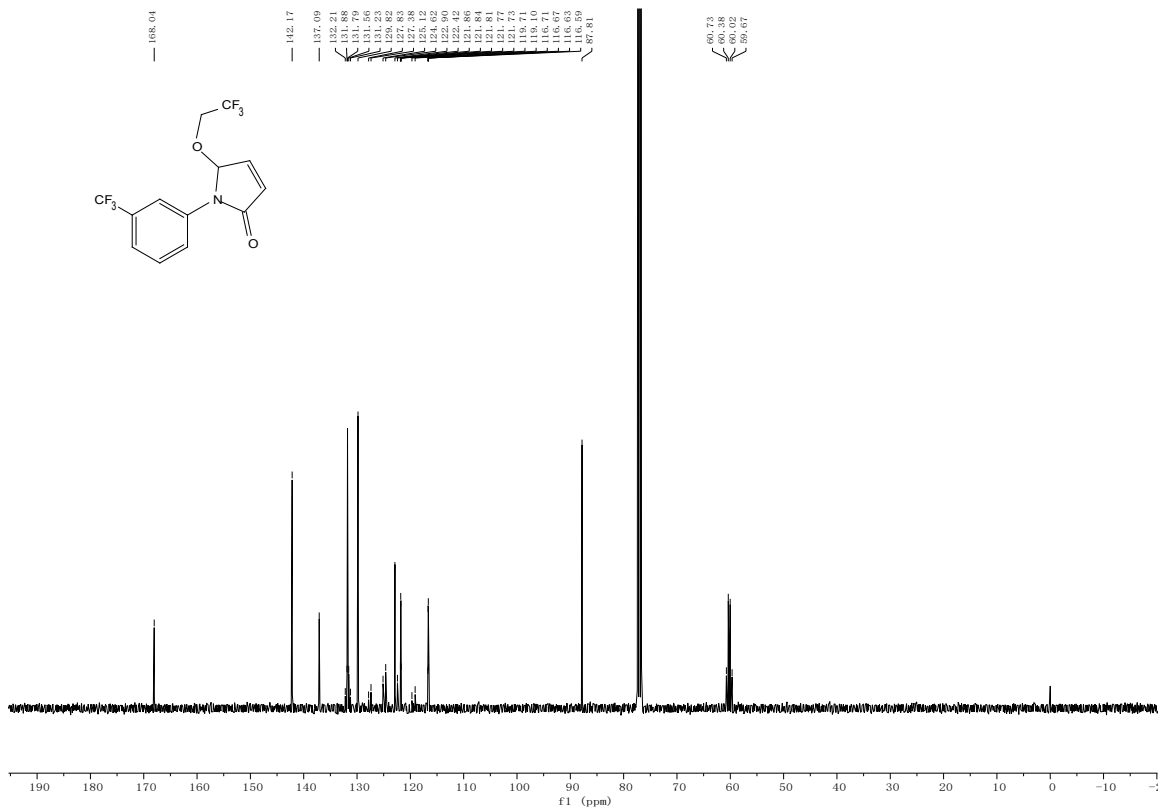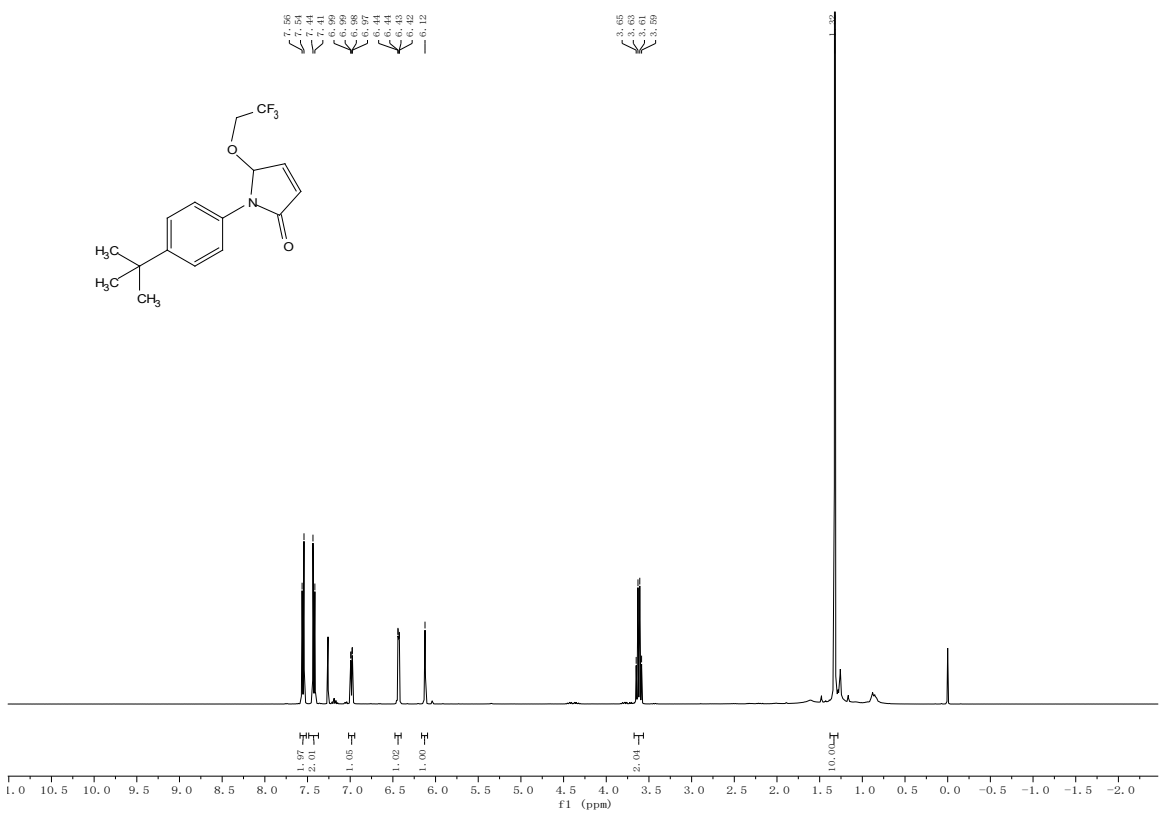

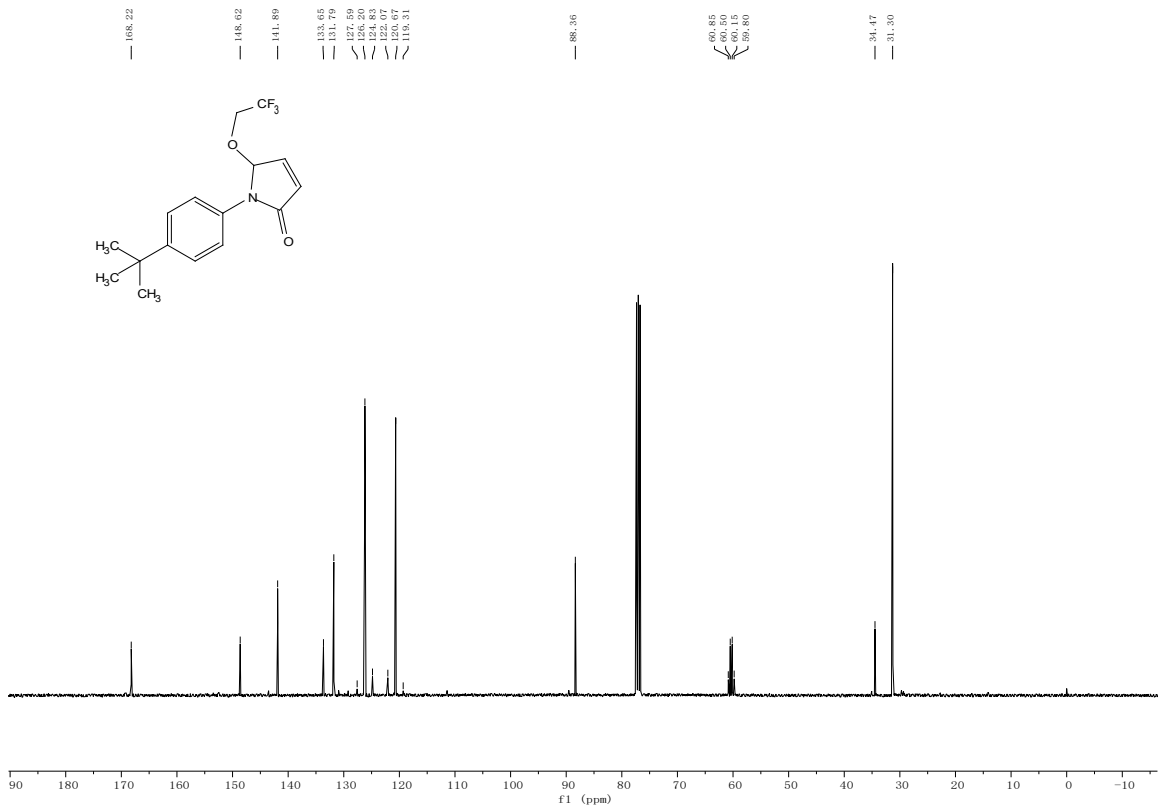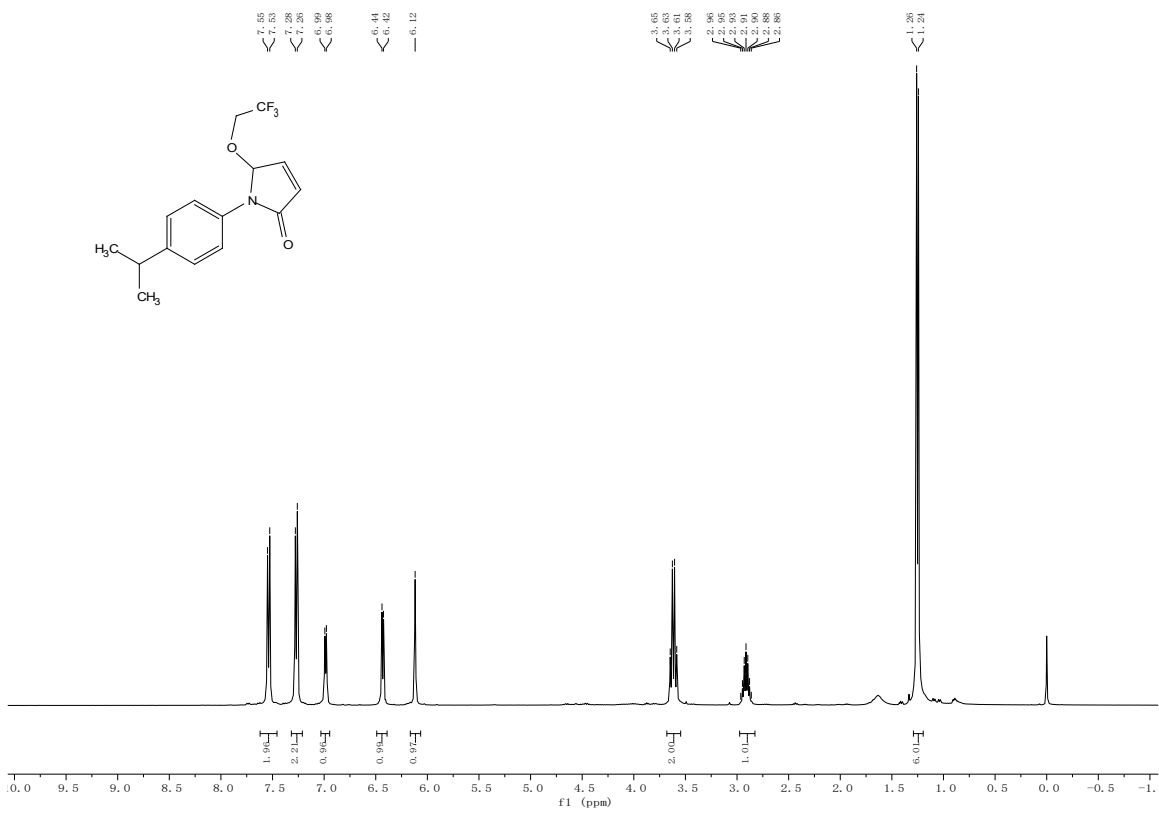

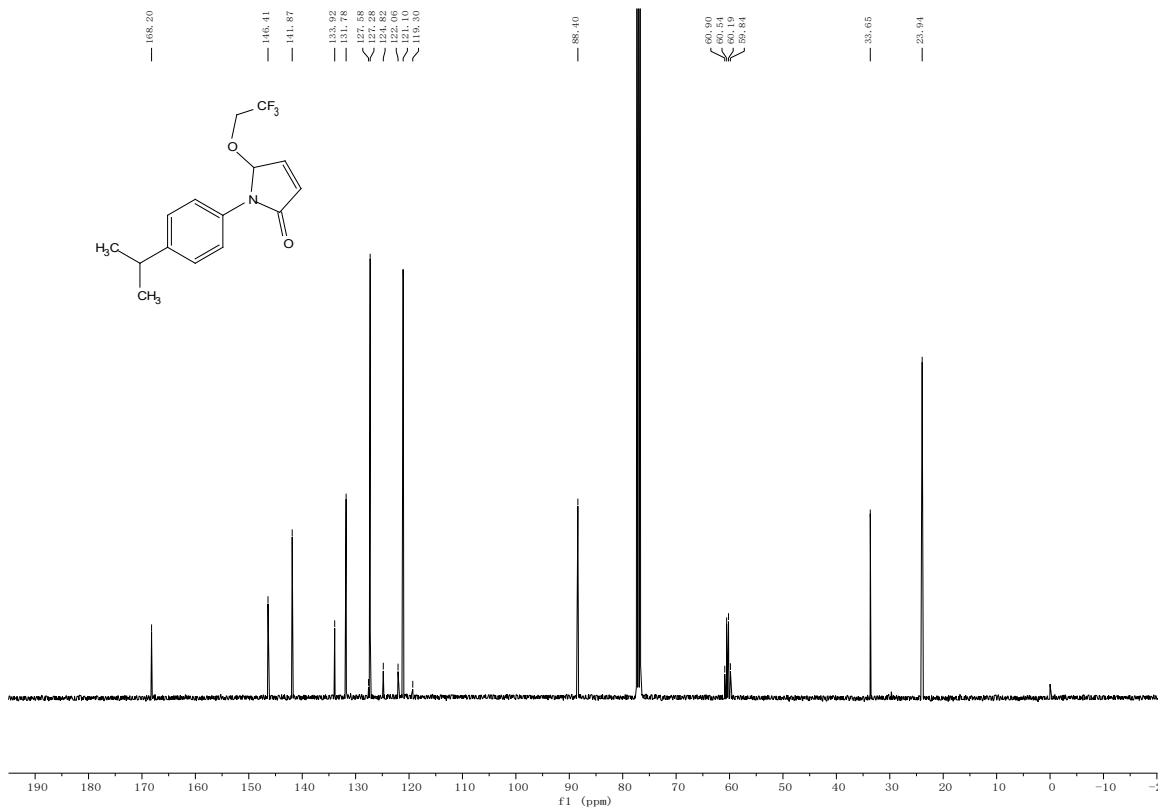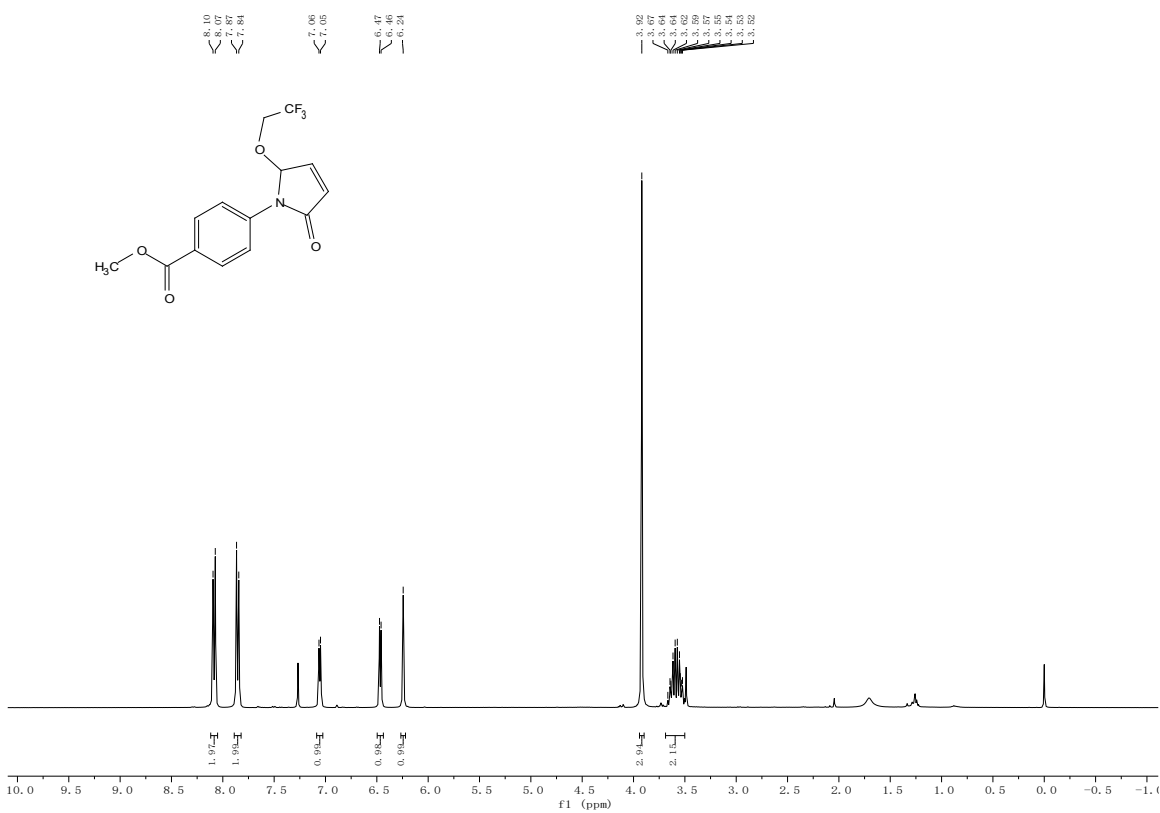

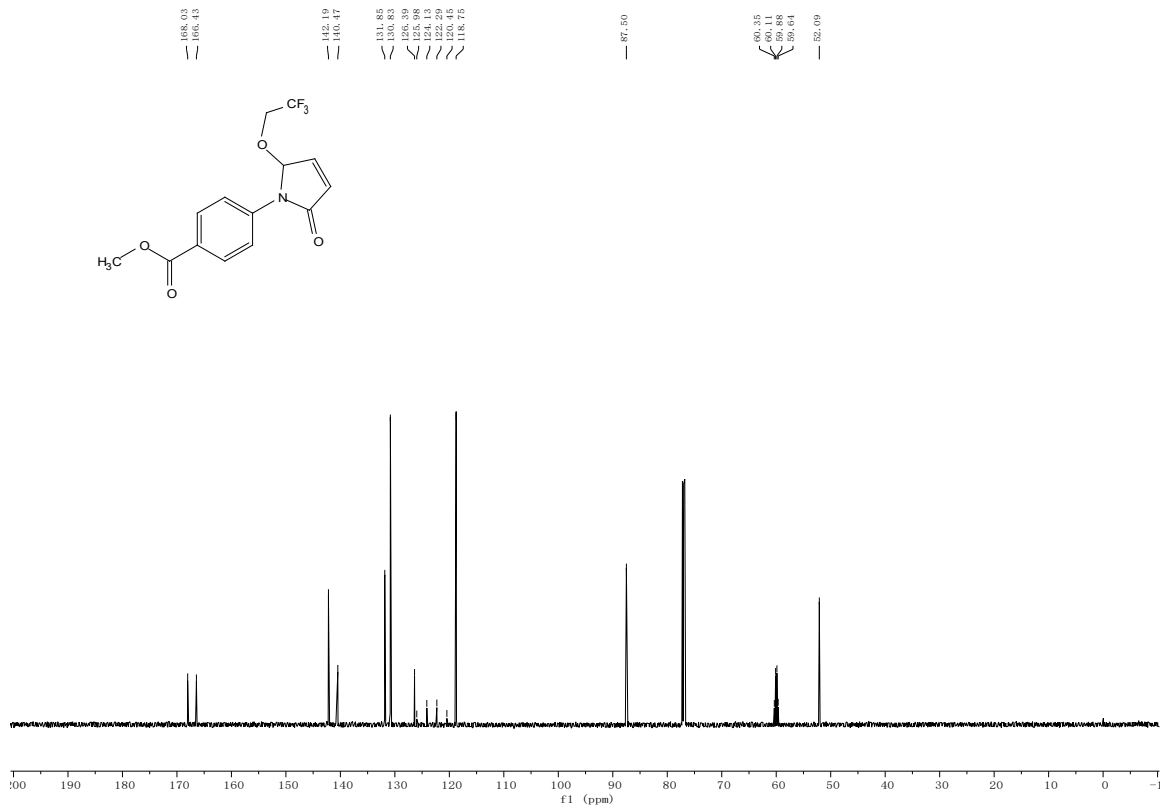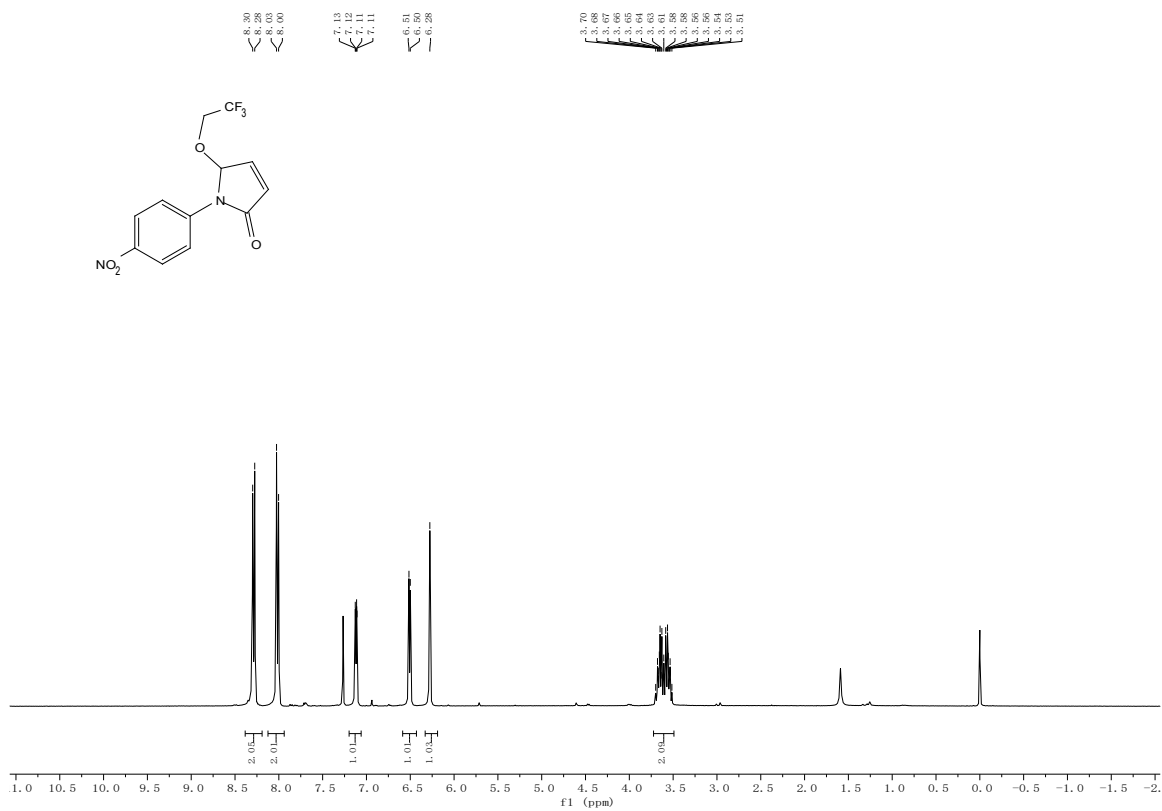

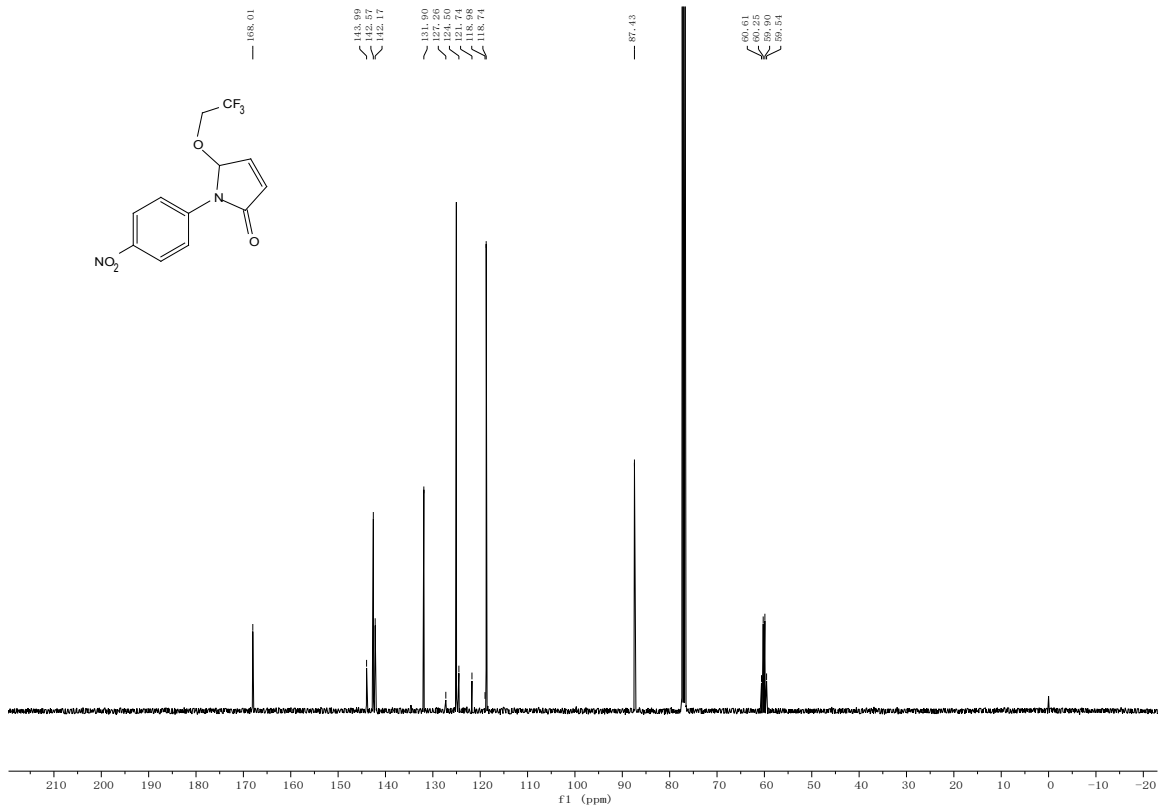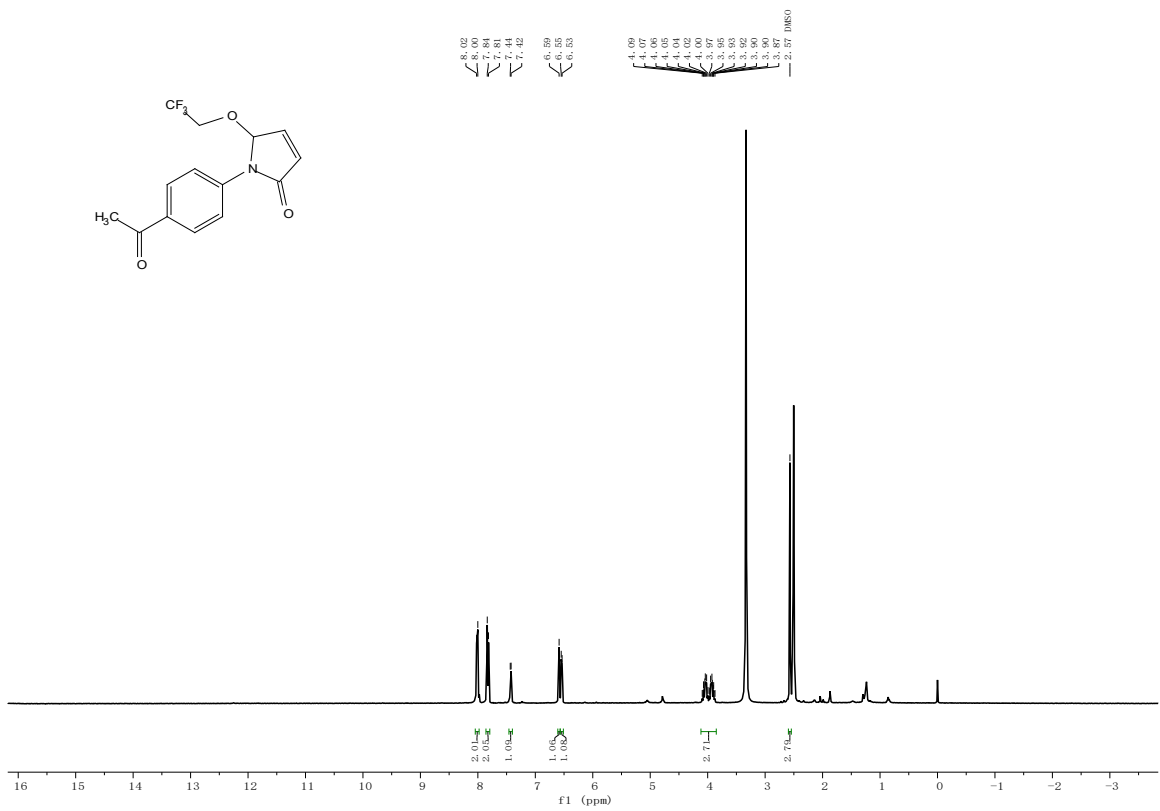

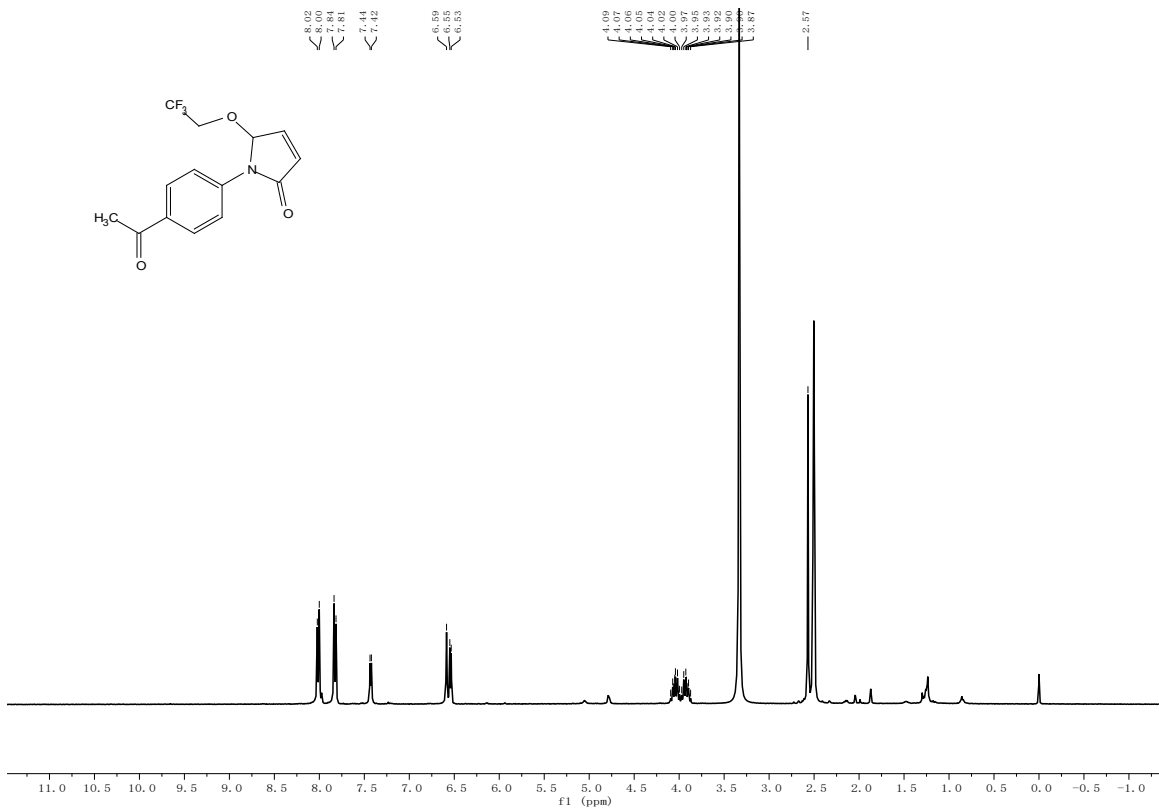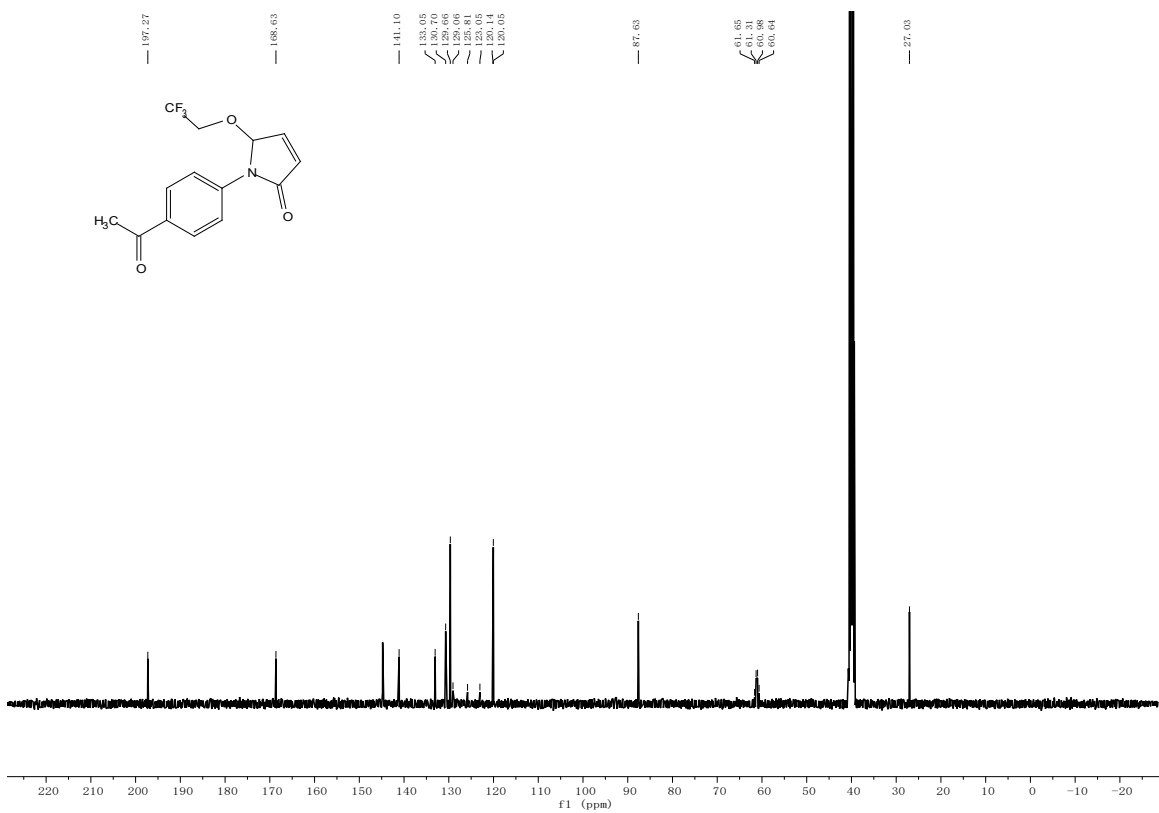

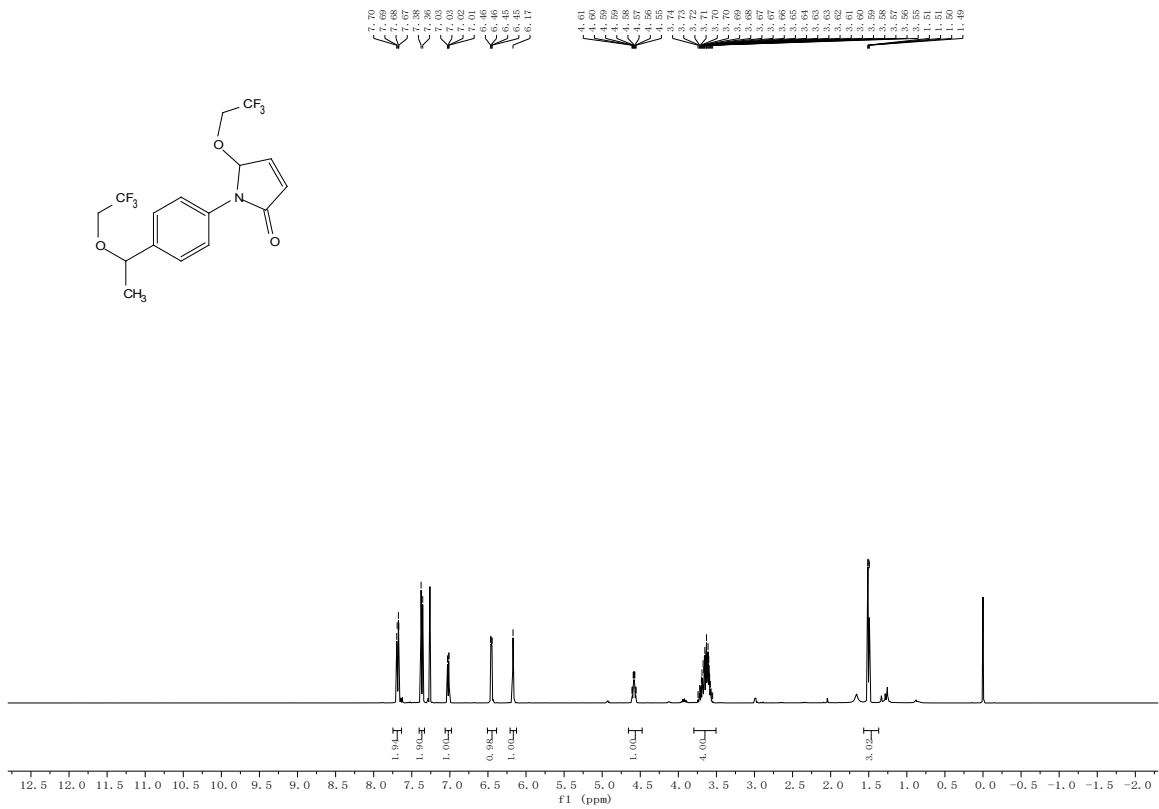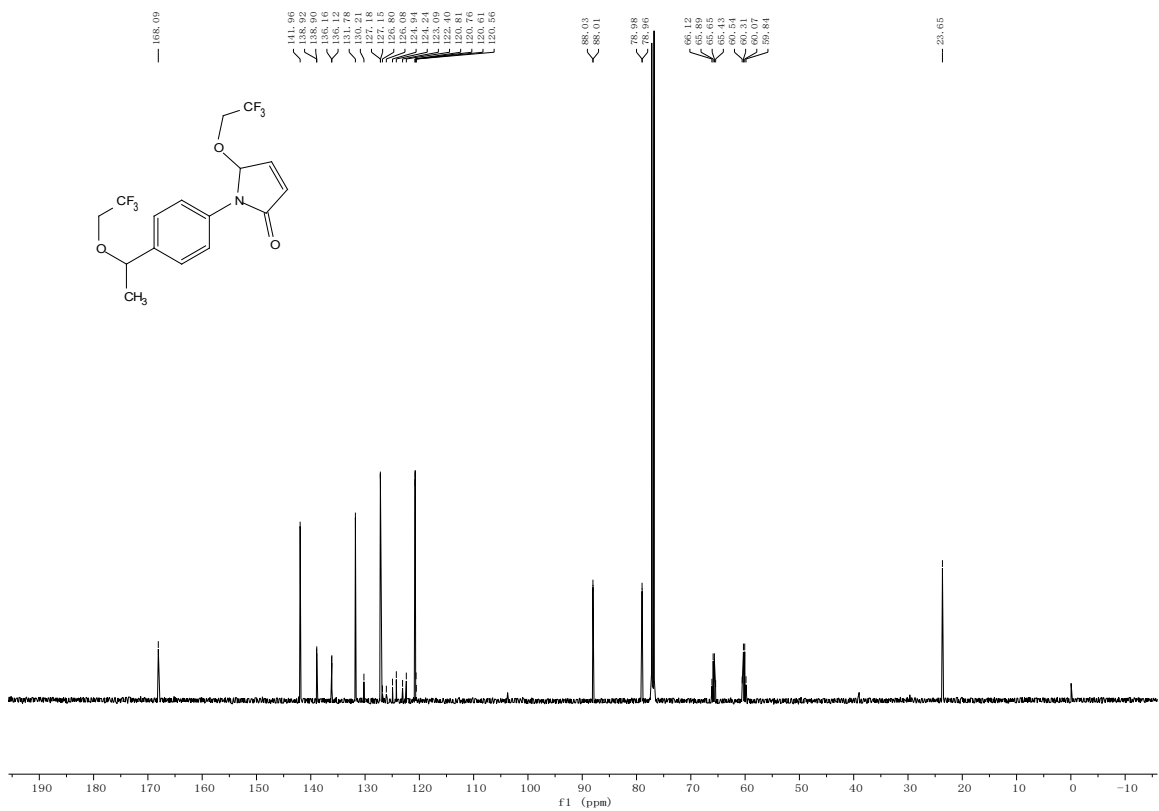

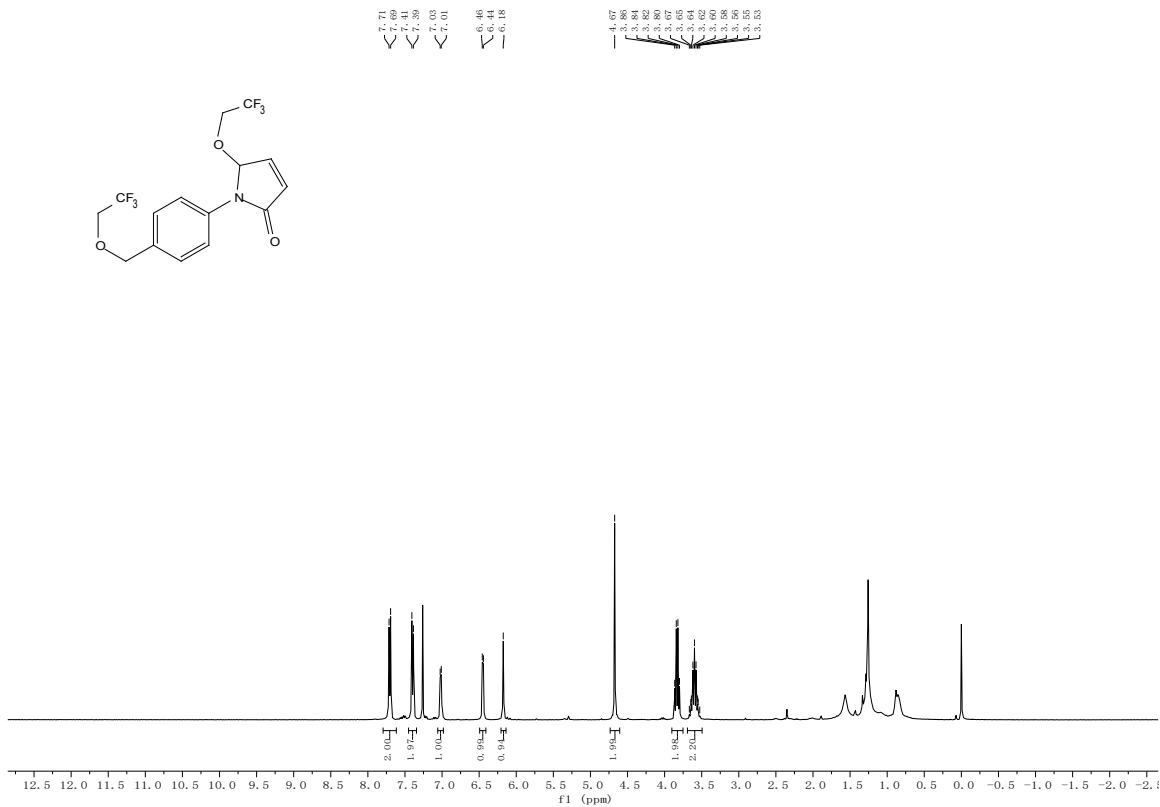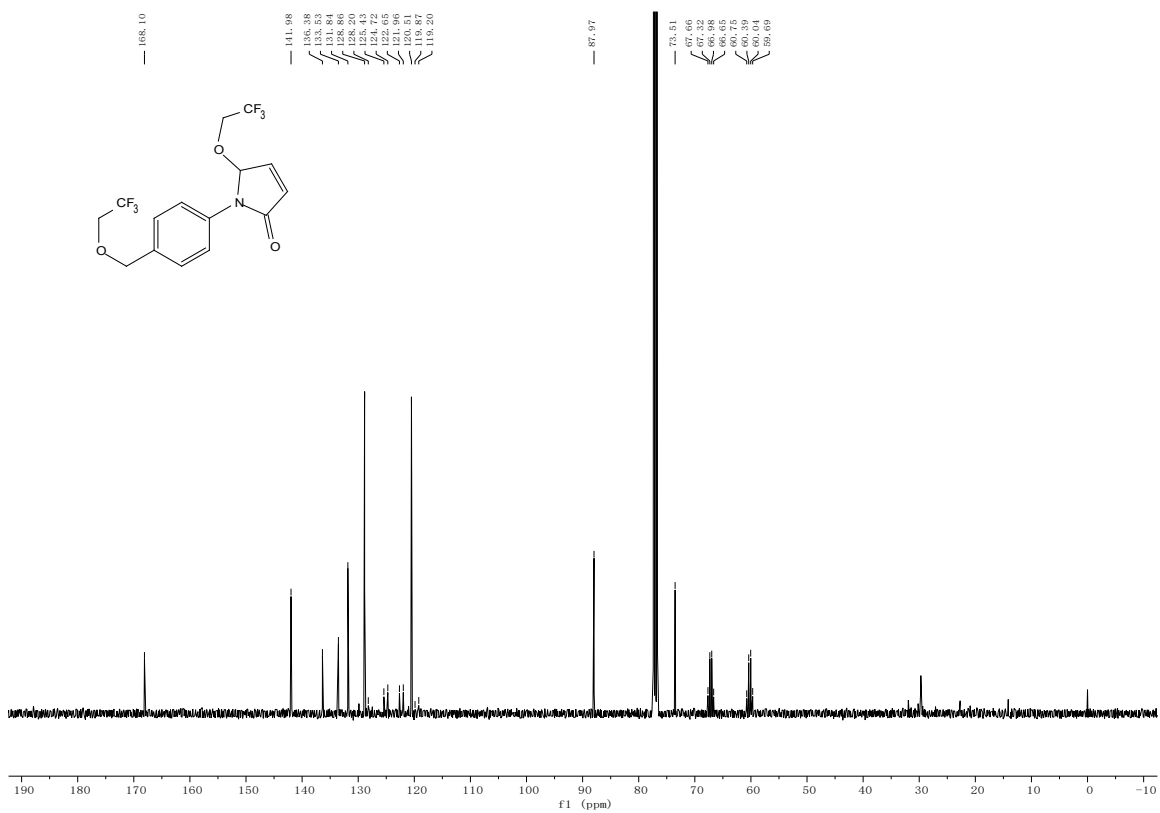



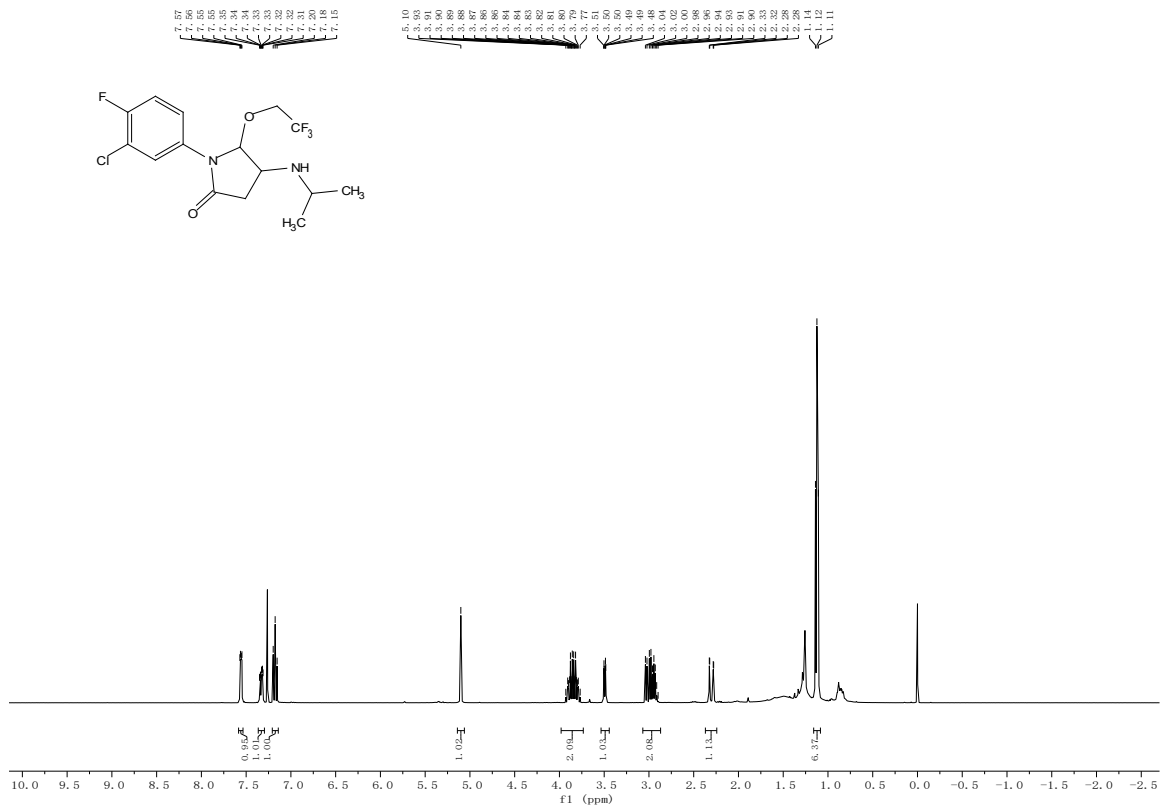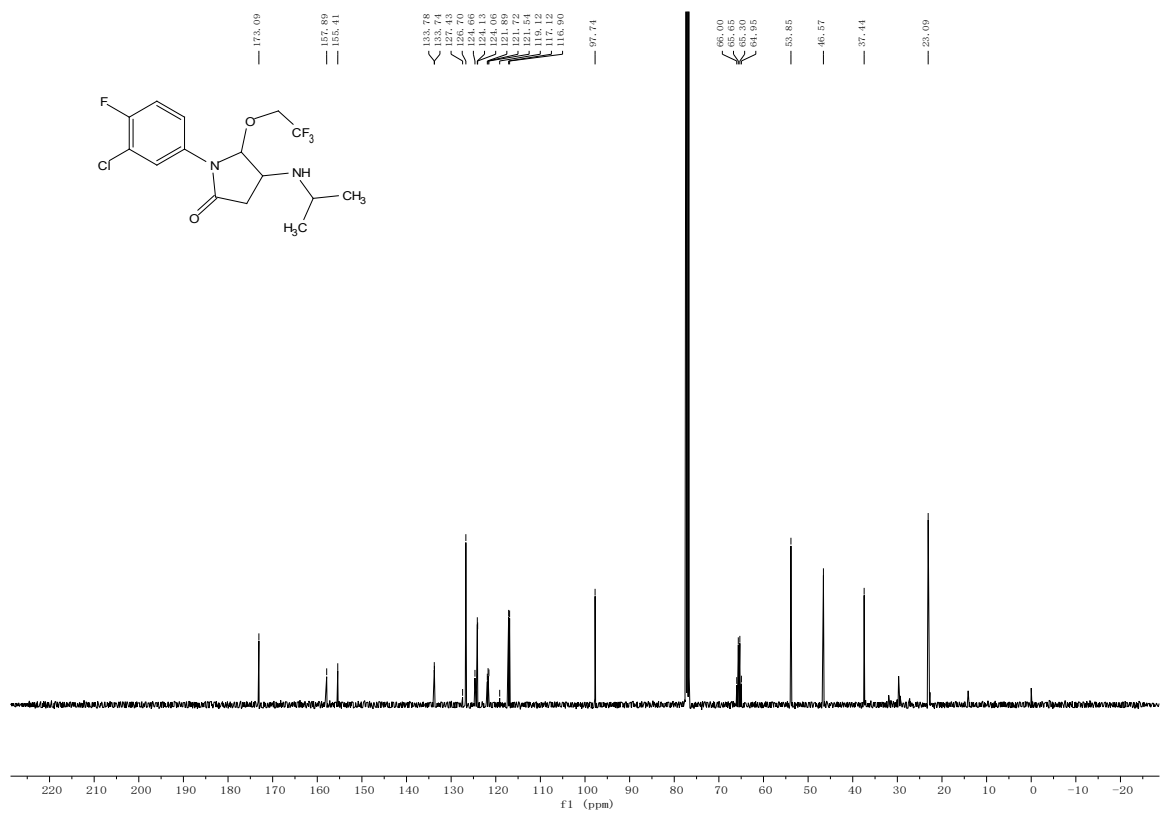

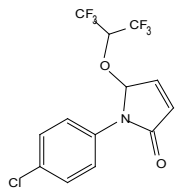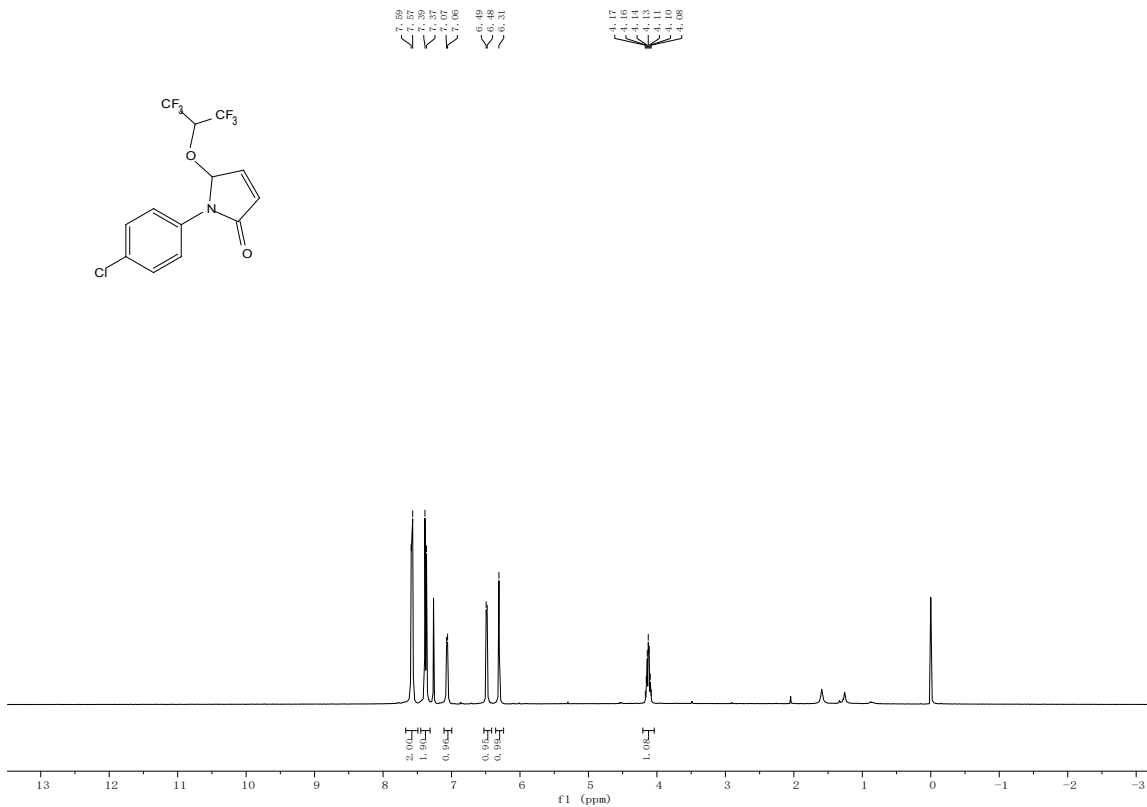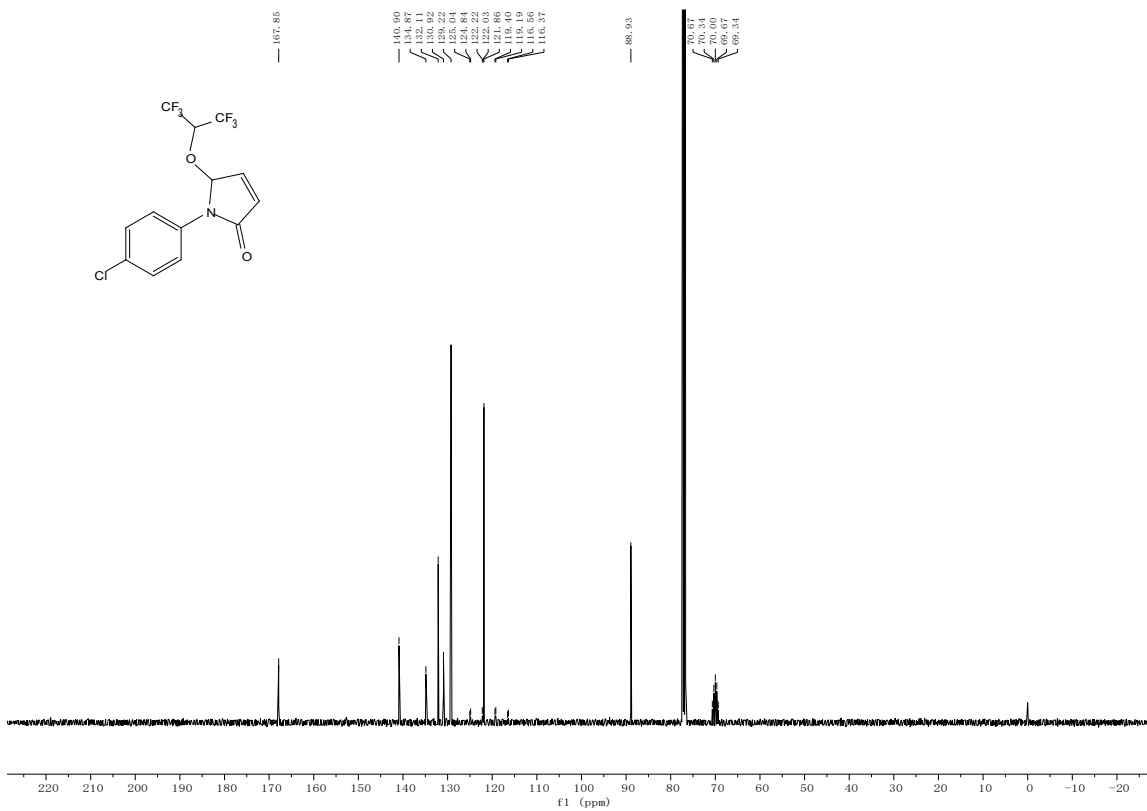

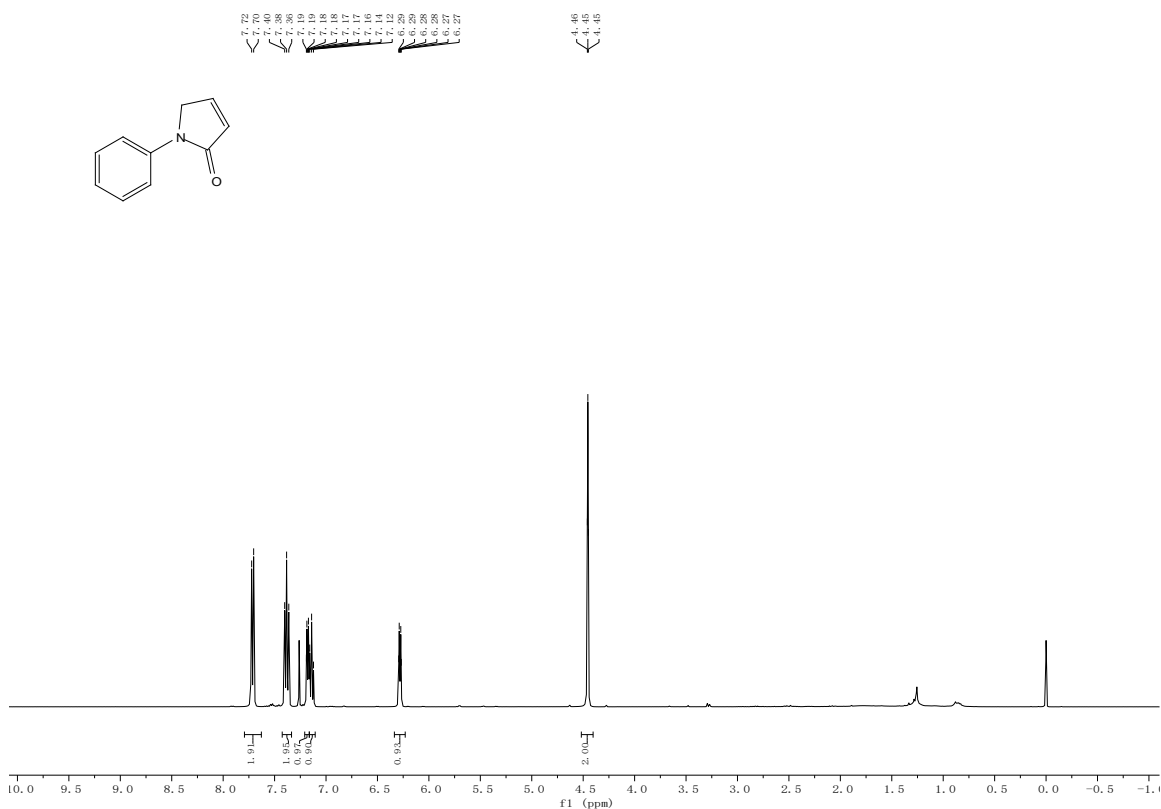

## 10. References

- (1) Zhukovsky, D.; Dar'in, D.; Kantin, G.; Krasavin, M. Synthetic Exploration of  $\alpha$ -Diazo  $\gamma$ -Butyrolactams. *European J. Org. Chem.* **2019**, *2019* (13), 2397–2400. <https://doi.org/10.1002/ejoc.201900133>.
- (2) Zheng, Y.; Nie, X.; Long, Y.; Ji, L.; Fu, H.; Zheng, X.; Chen, H.; Li, R. Ruthenium-Catalyzed Synthesis of N-Substituted Lactams by Acceptorless Dehydrogenative Coupling of Diols with Primary Amines. *Chem. Commun.* **2019**, *55* (82), 12384–12387. <https://doi.org/10.1039/C9CC06339K>.
- (3) Prince, R. J.; Gao, F.; Paziienza, J. E.; Marx, I. E.; Schulz, J.; Hopkins, B. T. Utilization of Cyclic Amides as Masked Aldehyde Equivalents in Reductive Amination Reactions. *J. Org. Chem.* **2019**, *84* (12), 7936–7949. <https://doi.org/10.1021/acs.joc.9b00816>.
- (4) Morstein, J.; Kalkman, E. D.; Cheng, C.; Hartwig, J. F. Copper-Mediated C–N Coupling of Arylsilanes with Nitrogen Nucleophiles. *Org. Lett.* **2016**, *18* (20), 5244–5247. <https://doi.org/10.1021/acs.orglett.6b02543>.
- (5) Orrling, K. M.; Wu, X.; Russo, F.; Larhed, M. ChemInform Abstract: Fast-, Acid-Free, and Selective Lactamization of Lactones in Ionic Liquids. *ChemInform* **2009**, *40* (12).
- (6) Chang, R. K.; Clairmont, B. P.; Lin, S.; MacArthur, A. H. R. Amidation of Aryl Chlorides Using a Microwave-Assisted, Copper-Catalyzed Concurrent Tandem Catalytic Methodology. *Organometallics* **2019**, *38* (22), 4448–4454. <https://doi.org/10.1021/acs.organomet.9b00561>.
- (7) Jiang, L. Copper/N,N-Dimethylglycine Catalyzed Goldberg Reactions between Aryl Bromides and

Amides, Aryl Iodides and Secondary Acyclic Amides. *Molecules* **2014**, *19* (9), 13448–13460.  
<https://doi.org/10.3390/molecules190913448>.
